# Supplementary material
Source: publisher figshare collection journal article supplement (https://acs.figshare.com/ndownloader/files/3728758)
Supplement: Supplementary file 1 [file 3728758]

- Supporting Information -

# **Catalytic Enantioselective Nitroso Diels-Alder Reaction**

Biplab Maji,\* and Hisashi Yamamoto\*

Molecular Catalyst Research Center, Chubu University, 487-8501 Kasugai, Japan

E-mail: [biplabmaji@isc.chubu.ac.jp](mailto:biplabmaji@isc.chubu.ac.jp), [hyamamoto@isc.chubu.ac.jp](mailto:hyamamoto@isc.chubu.ac.jp)

## Table of contents

|    |                                                                                                                                  |     |
|----|----------------------------------------------------------------------------------------------------------------------------------|-----|
| 1  | General                                                                                                                          | S3  |
| 2  | Enantioselective nitroso Diels-Alder reaction with symmetrical dienes <b>2a–h</b> .                                              | S4  |
| 3  | Enantioselective nitroso Diels-Alder reaction with unsymmetrical dienes <b>2i–p</b> .                                            | S8  |
| 4  | Enantioselective nitroso Diels-Alder reaction with racemic 2,6-disubstituted 1,3-cyclohexadienes <b>2q–u</b> .                   | S13 |
| 5  | Kinetic resolution of racemic diene <b>2r</b> via enantioselective NDA reaction.                                                 | S16 |
| 6  | Enantioselective NDA reaction of <i>rac</i> - <b>2v,w</b> .                                                                      | S17 |
| 7  | Synthesis of benzyl ((1 <i>S</i> ,4 <i>R</i> )-4-(( <i>tert</i> -butyldiphenylsilyl)oxy)cyclohex-2-en-1-yl)carbamate <b>4a</b> . | S18 |
| 8  | Formal synthesis tetraacetylated conduramine A-1 ( <b>5</b> )                                                                    | S20 |
| 9  | Formal synthesis of narciclasine <b>6a</b>                                                                                       | S22 |
| 10 | Effect of steric and electronic properties of nitroso compounds on nitroso Diels-Alder reaction.                                 | S24 |
| 11 | Competition experiment                                                                                                           | S29 |
| 12 | Synthesis of nitroso compounds                                                                                                   | S30 |
| 13 | Synthesis of the dienes <b>2q–u</b>                                                                                              | S34 |
| 14 | Synthesis of the dienes <b>2v,w</b>                                                                                              | S37 |
| 15 | References                                                                                                                       | S38 |
| 16 | Copies of <sup>1</sup> H and <sup>13</sup> C NMR spectra                                                                         | S39 |
| 17 | Copies of HPLC chromatogram                                                                                                      | S92 |

## 1. General.

*Chemicals.* Anhydrous THF, Et<sub>2</sub>O, toluene and CH<sub>2</sub>Cl<sub>2</sub> were dried with Glass Contour solvent purification system. Dry acetonitrile, EtOH, MeOH, and *n*-hexane were purchased from WAKO chemicals and used as received. All other chemicals were purchased from their commercial sources and used as it received.

*Analytics.*

NMR spectra were recorded on a JEOL JNM LA-400 (400 MHz for <sup>1</sup>H NMR and 100 MHz for <sup>13</sup>C NMR). Chemical shifts were reported in ppm on the  $\delta$  scale relative to solvent residual signal CDCl<sub>3</sub> ( $\delta$  = 7.26 <sup>1</sup>H NMR and for 77.2 for <sup>13</sup>C NMR), DMSO ( $\delta$  = 2.50 <sup>1</sup>H NMR and for 39.5 for <sup>13</sup>C NMR),  $\alpha,\alpha,\alpha$ -trifluorotoluene ( $\delta$  = -63.72 for <sup>19</sup>F NMR) as an internal reference. Multiplicities are indicated as: br (broad), s (singlet), d (doublet), t (triplet), dd (doublet of doublet), spt (septate), td (triplet of doublet), or m (multiplet). Coupling constants (*J*) are reported in Hertz (Hz). High performance liquid chromatography (HPLC) was performed on Agilent Technologies 1220 Infinity LC instruments using Daicel Chiralpak AD-H, OD-H, OJ-H and AS-H 4.6 mm  $\times$  25 cm column or Shimadzu HPLC instrument using IA-3, IB-3, IC-3 4.6 mm  $\times$  25 cm column. Optical rotations were measured on an ATAGO CO., LTD AP-300 polarimeter. Low temperature reactions were performed on UC reactor from Techno Signa. Column chromatography was conducted with silica gel 60 N (KANTO CHEMICAL, spherical, neutral, 40-50 or 63-210  $\mu$ m). For thin-layer chromatography (TLC) analysis Merck precoated TLC plates (silica gel 60 F254 0.25 mm) were used. Visualization was accomplished by UV light (254 nm), I<sub>2</sub>, KMnO<sub>4</sub>, and cerium molybdate.

## 2. Enantioselective nitroso Diels-Alder reaction with symmetrical dienes **2a–h**.

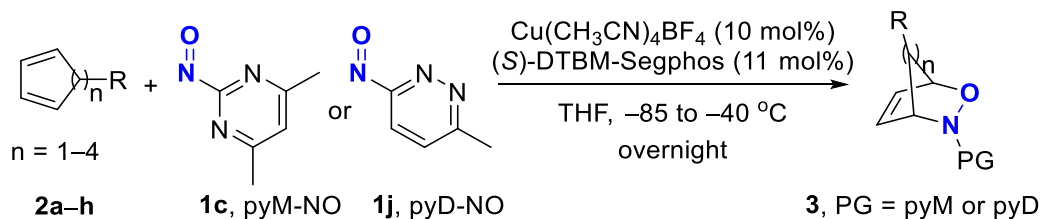

### General procedure 1:

Cu(CH<sub>3</sub>CN)<sub>4</sub>BF<sub>4</sub> (3.1 mg, 0.010 mmol) and (S)-DTBM-Segphos (13.0 mg, 0.011 mmol) were taken in an oven dried 16 × 150 mm test tube equipped with a magnetic stir bar and a rubber septum. The test tube was evacuated and carefully purged with nitrogen. THF (1 mL) was added to it and the mixture was stirred for 1 h. After that the catalyst solution was placed on a –85 °C bath. The nitroso compound **1c,j** (0.1 mmol) was then added and the wall of the test tube was rinsed with THF (0.5 mL). The mixture was further stirred for 10 min before the diene **2a–h** (0.12 mmol) was added. Then the reaction mixture was warmed to –40 °C over ~2 h and stirred at –40 °C overnight. It was then allowed to warm to 0 °C before directly loaded into a column packed with silica gel and purified using EtOAc/*n*-hexane (1:1 to 3:1), Acetone/*n*-hexane (1:4 to 1:3) as eluent to afford the nitroso Diels-Alder adducts **3**.

All the racemic samples were prepared by mixing the nitroso compounds **1c,j** (0.1 mmol) with the dienes **2a–h** (0.12 mmol) in CH<sub>2</sub>Cl<sub>2</sub> at 0 °C.

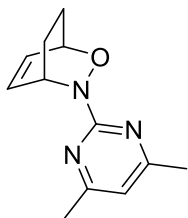

**3ac:** According to GP 1. 21 mg, 97%.  $[\alpha]_D^{24} -73.3$  ( $c = 1.5$ , CHCl<sub>3</sub>, 1.6:98.4 e.r.).

<sup>1</sup>H NMR (CDCl<sub>3</sub>, 400MHz):  $\delta = 6.44 - 6.58$  (m, 2 H), 6.41 (s, 1 H), 5.43 – 5.46 (m, 1 H), 4.84 – 4.87 (m, 1 H), 2.10 - 2.40 (m, 8 H), 1.47 - 1.62 (m, 1 H), 1.37 - 1.47 (m, 1 H) ppm. <sup>13</sup>C NMR (CDCl<sub>3</sub>, 101 MHz):  $\delta = 167.4, 165.4, 132.3, 132.0, 112.4, 112.4, 70.7, 50.4, 24.2, 24.0, 23.9, 21.1$  ppm. HRMS (ESI): Calculated for C<sub>12</sub>H<sub>15</sub>N<sub>3</sub>NaO<sub>1</sub> ([M + Na]<sup>+</sup>) is 240.1121, found 240.1113. HPLC analysis: Daicel Chiralpak AD-H, hexane/*i*-PrOH = 96/4, flow rate = 1.0 mL/min,  $\lambda = 267$  nm, retention time;  $t_R$ (minor) = 16.5 min,  $t_R$ (major) = 17.4 min.

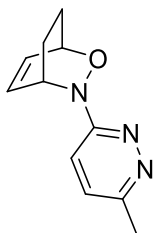

**3aj:** According to GP 1. 20.3 mg, 99%.  $[\alpha]_D^{28} -164.3$  ( $c = 1.4$ , CHCl<sub>3</sub>, 99.3:0.7 e.r.).

$^1\text{H}$  NMR ( $\text{CDCl}_3$ , 400MHz):  $\delta$  = 7.12 (d,  $J$  = 8.9 Hz, 1 H), 7.05 (d,  $J$  = 8.9 Hz, 1 H), 6.53 - 6.36 (m, 2 H), 5.51 (dd,  $J$  = 2.5, 5.3 Hz, 1 H), 4.74 - 4.61 (m, 1 H), 2.56 (s, 3 H), 2.32 - 2.17 (m, 2 H), 1.69 - 1.54 (m, 1 H), 1.51 - 1.35 (m, 1 H) ppm.  $^{13}\text{C}$  NMR ( $\text{CDCl}_3$ , 101 MHz):  $\delta$  = 164.9, 154.2, 133.3, 131.0, 128.2, 117.4, 70.1, 51.8, 24.5, 21.6, 20.3. HRMS (ESI): Calculated for  $\text{C}_{11}\text{H}_{14}\text{N}_3\text{O}_1$  ( $[\text{M} + \text{H}]^+$ ) is 204.1131, found 204.1124. HPLC analysis: Daicel Chiralpak AD-H, hexane/*i*-PrOH = 96/4, flow rate = 1.0 mL/min,  $\lambda$  = 267 nm, retention time;  $t_{\text{R}}(\text{major})$  = 21.8 min,  $t_{\text{R}}(\text{minor})$  = 24.0 min.

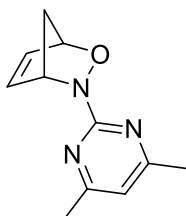

**3bc:** According to GP 1. 19 mg, 93%.  $[\alpha]_{\text{D}}^{24}$  -154.6 ( $c$  = 1.5,  $\text{CHCl}_3$ , 2.3:97.7 e.r.).

$^1\text{H}$  NMR ( $\text{CDCl}_3$ , 400MHz):  $\delta$  = 6.48 (s, 1 H), 6.36 (dt,  $J$  = 5.6, 1.9 Hz, 1 H), 6.28 (dt,  $J$  = 5.5, 1.9 Hz, 1 H), 5.47 - 5.57 (m, 1 H), 5.24 - 5.36 (m, 1 H), 2.35 (s, 6 H), 2.15 (dt,  $J$  = 8.5, 1.8 Hz, 1 H), 1.80 (d,  $J$  = 8.5 Hz, 1 H) ppm.  $^{13}\text{C}$  NMR ( $\text{CDCl}_3$ , 101 MHz):  $\delta$  = 167.6, 166.2, 135.3, 133.4, 113.4, 83.7, 65.8, 48.0, 24.2 ppm. HRMS (ESI): Calculated for  $\text{C}_{11}\text{H}_{13}\text{N}_3\text{Na}_1\text{O}_1$  ( $[\text{M} + \text{Na}]^+$ ) is 226.0951, found 226.0942. HPLC analysis: Daicel Chiralpak AD-H, hexane/*i*-PrOH = 96/4, flow rate = 1.0 mL/min,  $\lambda$  = 267 nm, retention time;  $t_{\text{R}}(\text{minor})$  = 17.1 min,  $t_{\text{R}}(\text{major})$  = 22.2 min.

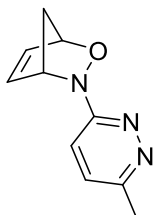

**3bj:** According to GP 1. 18 mg, 95%.  $[\alpha]_{\text{D}}^{24}$  -6.7 ( $c$  = 0.60,  $\text{CHCl}_3$ , 95.0:5.0 e.r.).

$^1\text{H}$  NMR ( $\text{CDCl}_3$ , 400MHz):  $\delta$  = 7.14 (d,  $J$  = 8.9 Hz, 1 H), 7.00 (d,  $J$  = 8.9 Hz, 1 H), 6.29 (t,  $J$  = 1.9 Hz, 1 H), 5.70 (t,  $J$  = 1.6 Hz, 1 H), 5.15 - 5.28 (m, 1 H), 2.18 (dt,  $J$  = 8.5, 1.9 Hz, 1 H), 1.89 (d,  $J$  = 8.7 Hz, 1 H) ppm.  $^{13}\text{C}$  NMR ( $\text{CDCl}_3$ , 101 MHz):  $\delta$  = 164.5, 154.7, 136.6, 132.9, 128.2, 118.1, 83.0, 66.6, 48.6, 21.6. HRMS (FAB): Calculated for  $\text{C}_{10}\text{H}_{12}\text{N}_3\text{O}_1$  ( $[\text{M} + \text{H}]^+$ ) is 190.0980, found 190.0975. HPLC analysis: Daicel Chiralpak AD-H, hexane/*i*-PrOH = 97/3, flow rate = 1.0 mL/min,  $\lambda$  = 267 nm, retention time;  $t_{\text{R}}(\text{major})$  = 26.7 min,  $t_{\text{R}}(\text{minor})$  = 30.3 min.

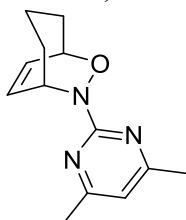

**3cc:** According to GP 1. 22 mg, 96%.  $[\alpha]_{\text{D}}^{24}$  -50.8 ( $c$  = 1.2,  $\text{CHCl}_3$ , 2.6:97.4 e.r.).

$^1\text{H}$  NMR ( $\text{CDCl}_3$ , 400MHz):  $\delta$  = 6.38 (s, 1 H), 6.31 (ddd,  $J$  = 9.1, 6.9, 0.9 Hz, 1 H), 6.15 (ddd,  $J$  = 9.2, 6.2, 1.4 Hz, 1 H), 5.44 - 5.58 (m, 1 H), 4.91 (t,  $J$  = 5.2 Hz, 1 H), 2.33 (s, 6 H), 1.86 - 2.06 (m, 3 H), 1.71 - 1.84 (m, 1 H), 1.53 - 1.65 (m, 1 H), 1.36 - 1.52 (m, 1 H) ppm.  $^{13}\text{C}$  NMR ( $\text{CDCl}_3$ , 101 MHz):  $\delta$  = 167.5, 164.3, 130.0, 127.9, 111.5, 74.8, 54.8, 31.1, 28.0, 24.3, 18.9 ppm. HRMS (ESI): Calculated for  $\text{C}_{13}\text{H}_{17}\text{N}_3\text{Na}_1\text{O}_1$  ( $[\text{M} + \text{Na}]^+$ ) is 254.1264, found 254.1259. HPLC analysis: Daicel Chiralpak AD-H, hexane/*i*-PrOH = 96/4, flow rate = 1.0 mL/min,  $\lambda$  = 267 nm, retention time;  $t_{\text{R}}(\text{minor})$  = 12.2 min,  $t_{\text{R}}(\text{major})$  = 16.4 min.

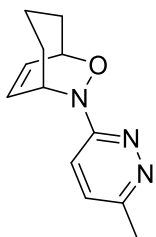

**3cj:** According to GP 1. 21 mg, 97%.  $[\alpha]_{\text{D}}^{25} -138.0$  ( $c = 1.0$ ,  $\text{CHCl}_3$ , 98.1:1.9 e.r.).

$^1\text{H}$  NMR ( $\text{CDCl}_3$ , 400MHz):  $\delta = 7.21 - 7.10$  (m, 2 H), 6.33 – 6.35 (m, 1 H), 5.99 – 6.03 (m, 1 H), 5.68 – 5.53 (m, 1 H), 4.75 – 4.78 (m, 1 H), 2.56 (s, 3 H), 2.15 – 1.87 (m, 3 H), 1.85 – 1.70 (m, 2 H), 1.68 – 1.56 (m, 1 H), 1.53 – 1.36 (m, 1 H) ppm.  $^{13}\text{C}$  NMR ( $\text{CDCl}_3$ , 101 MHz):  $\delta = 164.2, 153.6, 132.0, 128.4, 126.0, 116.7, 74.3, 56.3, 31.8, 27.2, 21.5, 18.9$ . HRMS (FAB): Calculated for  $\text{C}_{12}\text{H}_{16}\text{N}_3\text{O}_1$  ( $[\text{M} + \text{H}]^+$ ) is 218.1293, found 218.1292. HPLC analysis: Daicel Chiralpak IB-3, hexane/*i*-PrOH = 96/4, flow rate = 1.0 mL/min,  $\lambda = 254$  nm, retention time;  $t_{\text{R}}(\text{major}) = 29.7$  min,  $t_{\text{R}}(\text{minor}) = 39.1$  min.

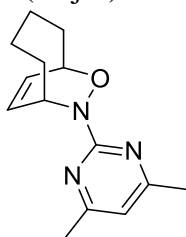

**3dc:** According to GP 1. 22 mg, 90%.  $[\alpha]_{\text{D}}^{25} +90.0$  ( $c = 1.0$ ,  $\text{CHCl}_3$ , 2.0:98.0 e.r.).

$^1\text{H}$  NMR ( $\text{CDCl}_3$ , 400MHz):  $\delta = 6.44$  (s, 1 H), 6.30 (dd,  $J=9.8, 6.6$  Hz, 1 H), 5.71 (dd,  $J=10.1, 4.4$  Hz, 1 H), 5.19 – 5.22 (m, 1 H), 5.01 – 5.11 (m, 1 H), 2.34 (s, 6 H), 2.09 – 2.32 (m, 3 H), 1.79 – 1.87 (m, 1 H), 1.56 – 1.78 (m, 4 H) ppm.  $^{13}\text{C}$  NMR ( $\text{CDCl}_3$ , 101 MHz):  $\delta = 167.7, 166.3, 132.1, 126.8, 112.4, 74.5, 55.1, 34.4, 32.1, 26.4, 24.3, 22.6, 22.6$  ppm. HRMS (ESI): Calculated for  $\text{C}_{14}\text{H}_{19}\text{N}_3\text{Na}_1\text{O}_1$  ( $[\text{M} + \text{Na}]^+$ ) is 268.1434, found 268.1430. HPLC analysis: Daicel Chiralpak AD-H, hexane/*i*-PrOH = 96/4, flow rate = 1.0 mL/min,  $\lambda = 267$  nm, retention time;  $t_{\text{R}}(\text{minor}) = 7.5$  min,  $t_{\text{R}}(\text{major}) = 10.2$  min.

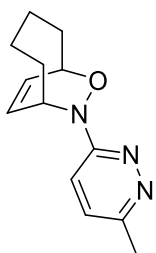

**3dj:** According to GP 1. 21 mg, 91%.  $[\alpha]_{\text{D}}^{24} +95.0$  ( $c = 1.0$ ,  $\text{CHCl}_3$ , 99.9:0.1 e.r.).

$^1\text{H}$  NMR ( $\text{CDCl}_3$ , 400MHz):  $\delta = 7.25$  (d,  $J = 9.2$  Hz, 1 H), 7.16 (d,  $J = 9.2$  Hz, 1 H), 6.39 (dd,  $J = 6.8, 10.2$  Hz, 1 H), 5.67 (dd,  $J = 4.6, 10.1$  Hz, 1 H), 5.52 – 5.37 (m, 1 H), 4.85 (t,  $J = 4.1$  Hz, 1 H), 2.57 (s, 3 H), 2.25 – 2.32 (m, 1 H), 2.17 – 2.00 (m, 2 H), 1.89 (tt,  $J = 4.5, 9.1$  Hz, 1 H), 1.80 – 1.56 (m, 5 H) ppm.  $^{13}\text{C}$  NMR ( $\text{CDCl}_3$ , 101 MHz):  $\delta = 163.7, 153.7, 133.1, 128.6, 125.5, 116.1, 74.1, 54.3, 35.0, 31.8, 26.3, 22.0$ . HRMS (FAB): Calculated for  $\text{C}_{13}\text{H}_{18}\text{N}_3\text{O}_1$  ( $[\text{M} + \text{H}]^+$ ) is 231.1450, found 231.1446. HPLC analysis: Daicel Chiralpak IB-3, hexane/*i*-PrOH = 96/4, flow rate = 1.0 mL/min,  $\lambda = 254$  nm, retention time;  $t_{\text{R}}(\text{major}) = 26.4$  min,  $t_{\text{R}}(\text{minor}) = 28.9$  min.

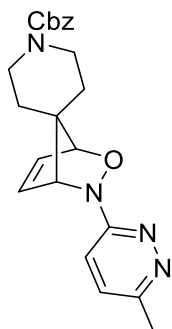

**3ej:** According to GP 1. 37 mg, 94%.  $[\alpha]_D^{25} - 82.7$  ( $c = 1.5$ ,  $\text{CHCl}_3$ , 99.4:0.6 e.r.).

$^1\text{H}$  NMR ( $\text{CDCl}_3$ , 400MHz):  $\delta = 7.43 - 7.28$  (m, 5 H), 7.11 (d,  $J = 8.9$  Hz, 1 H), 6.93 (d,  $J = 8.9$  Hz, 1 H), 6.29 - 6.14 (m, 2 H), 5.32 (s, 1 H), 5.14 (s, 2 H), 4.73 (s, 1 H), 3.70 - 3.57 (m, 1 H), 3.57 - 3.43 (m, 2 H), 3.41 - 3.29 (m, 1 H), 2.57 (s, 3 H), 2.04 (br. s., 1 H), 1.91 (br. s., 1 H), 1.64 (br. s., 1 H), 1.61 - 1.48 (m, 1 H) ppm.  $^{13}\text{C}$  NMR ( $\text{CDCl}_3$ , 101 MHz):  $\delta = 154.6$ , 136.9, 135.9, 131.0, 128.6, 128.2, 128.1, 128.0, 117.6, 86.4, 70.0, 67.2, 60.8, 42.4, 41.7, 29.3, 29.2, 21.6. HRMS (FAB): Calculated for  $\text{C}_{22}\text{H}_{25}\text{N}_4\text{O}_3$  ( $[\text{M} + \text{H}]^+$ ) is 393.1927, found 393.1933. HPLC analysis: Daicel Chiralpak AD-H, hexane/*i*-PrOH = 80/20, flow rate = 1.0 mL/min,  $\lambda = 267$  nm, retention time;  $t_R(\text{major}) = 34.9$  min,  $t_R(\text{minor}) = 37.8$  min.

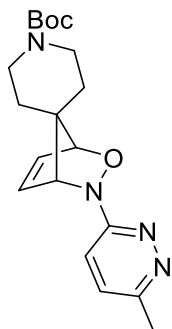

**3fj:** According to GP 1. 33 mg, 92%.  $[\alpha]_D^{25} - 93.3$  ( $c = 1.5$ ,  $\text{CHCl}_3$ , 99.0:1.0 e.r.).

$^1\text{H}$  NMR ( $\text{CDCl}_3$ , 400MHz):  $\delta = 7.10$  (d,  $J=8.9$  Hz, 1 H), 6.92 (d,  $J=8.9$  Hz, 1 H), 6.11 - 6.26 (m, 2 H), 5.29 (s, 1 H), 4.71 (s, 1 H), 3.47 - 3.60 (m, 1 H), 3.34 - 3.45 (m, 2 H), 3.21 - 3.32 (m, 1 H), 2.56 (s, 3 H), 1.96 - 2.07 (m, 1 H), 1.85 - 1.91 (m, 1 H), 1.48 - 1.67 (m, 2 H), 1.45 (s, 9 H) ppm.  $^{13}\text{C}$  NMR ( $\text{CDCl}_3$ , 101 MHz):  $\delta = 164.3$ , 154.9, 154.5, 135.9, 131.0, 128.2, 128.1, 117.6, 86.4, 79.7, 70.1, 61.0, 29.3, 28.6, 28.6, 21.6 ppm. HRMS (FAB): Calculated for  $\text{C}_{19}\text{H}_{27}\text{N}_4\text{O}_3$  ( $[\text{M} + \text{H}]^+$ ) is 359.2083, found 359.2070. HPLC analysis: Daicel Chiralpak AD-H, hexane/*i*-PrOH = 85/15, flow rate = 1.0 mL/min,  $\lambda = 267$  nm, retention time;  $t_R(\text{major}) = 11.1$  min,  $t_R(\text{minor}) = 13.0$  min.

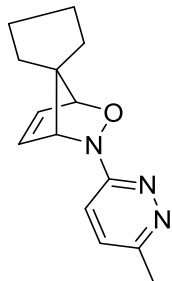

**3gj:** According to GP 1. 23 mg, 95%.  $[\alpha]_D^{25} - 216.7$  ( $c = 1.7$ ,  $\text{CHCl}_3$ , 98.7:1.3 e.r.).

$^1\text{H}$  NMR ( $\text{CDCl}_3$ , 400MHz):  $\delta = 7.10$  (d,  $J=8.9$  Hz, 1 H), 6.94 (d,  $J=8.9$  Hz, 1 H), 6.10 - 6.29 (m, 2 H), 5.10 (s, 1 H), 4.47 - 4.62 (m, 1 H), 2.56 (s, 3 H), 1.81 - 1.89 (m, 2 H), 1.49 - 1.75 (m, 5 H), 1.37 - 1.49 (m, 1 H) ppm.  $^{13}\text{C}$  NMR ( $\text{CDCl}_3$ , 101 MHz):  $\delta = 164.4$ , 154.3, 137.7, 133.4, 128.1, 117.6, 88.1, 73.0, 68.6, 31.9, 31.4, 26.6, 26.3, 21.6 ppm. HRMS (FAB): Calculated for

C<sub>14</sub>H<sub>18</sub>N<sub>3</sub>O<sub>1</sub> ([M + H]<sup>+</sup>) is 244.1450, found 244.1451. HPLC analysis: Daicel Chiralpak AD-H, hexane/*i*-PrOH = 95/5, flow rate = 1.0 mL/min, λ = 267 nm, retention time; t<sub>R</sub>(major) = 15.7 min, t<sub>R</sub>(minor) = 18.7 min.

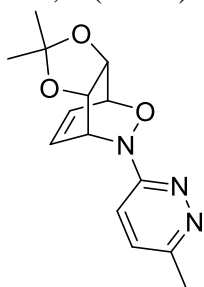

**3hj**: According to GP 1. With 5 mol% catalyst loading and 0.2 mmol of **1j**. 54.5 mg, 99%. [α]<sub>D</sub><sup>25</sup> – 130.8 (*c* = 1.3 CHCl<sub>3</sub>, 0.1:99.9 e.r.).

<sup>1</sup>H NMR (CDCl<sub>3</sub>, 400MHz): δ = 7.16 (d, *J*=8.9 Hz, 1 H), 7.09 (d, *J*=9.2 Hz, 1 H), 6.21 - 6.41 (m, 2 H), 5.82 – 5.84 (m, 1 H), 4.83 – 4.86 (m, 1 H), 4.70 (dd, *J*=6.9, 4.1 Hz, 1 H), 4.56 - 4.66 (m, 1 H), 2.58 (s, 3 H), 1.34 (s, 6 H) ppm. <sup>13</sup>C NMR (CDCl<sub>3</sub>, 101 MHz): δ = 163.7, 155.0, 132.0, 128.7, 128.4, 128.4, 117.9, 110.9, 73.8, 73.3, 73.2, 70.4, 54.8, 25.8, 25.5, 21.6 ppm. HRMS (FAB): Calculated for C<sub>14</sub>H<sub>18</sub>N<sub>3</sub>O<sub>3</sub> ([M + H]<sup>+</sup>) is 276.1348, found 276.1346. HPLC analysis: Daicel Chiralpak IB-3, hexane/*i*-PrOH = 93/7, flow rate = 1.0 mL/min, λ = 254 nm, retention time; t<sub>R</sub>(minor) = 19.3 min, t<sub>R</sub>(major) = 35.6 min.

### 3. Enantioselective nitroso Diels-Alder reaction with unsymmetrical dienes **2i–p**.

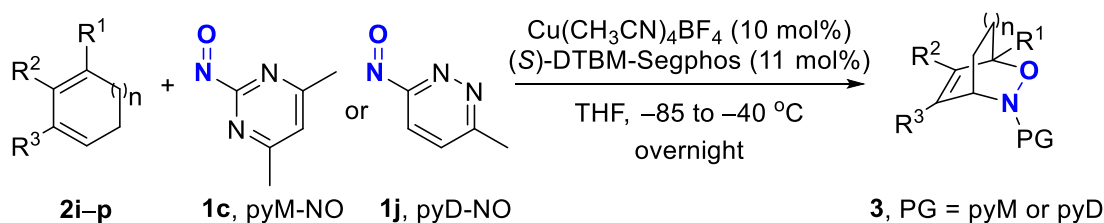

#### General procedure 2:

Cu(CH<sub>3</sub>CN)<sub>4</sub>BF<sub>4</sub> (3.1 mg, 0.010 mmol) and (S)-DTBM-Segphos (13.0 mg, 0.011 mmol) were taken in an oven dried 16 × 150 mm test tube equipped with a magnetic stir bar and a rubber septum. The test tube was evacuated and carefully purged with nitrogen. THF (1 mL) was added to it and the mixture was stirred for 1 h. After that the catalyst solution was placed on a –85 °C bath. Nitroso compound **1c,j** (0.1 mmol) was then added and the wall of the test tube was rinsed with THF (0.5 mL). The mixture was further stirred for 10 min before the diene **2i–p** (0.12 mmol) was added. Then the reaction mixture was warmed to –40 °C over ~2 h and stirred at –40 °C overnight. It was then allowed to warm to 0 °C before directly loaded into a column packed with silica gel and purified using EtOAc/*n*-hexane (1:1 to 3:1), Acetone/*n*-hexane (1:4 to 1:3), or EtOAc/*n*-hexane/NEt<sub>3</sub> (10:40:1 to 10:20:1) as eluent to afford the nitroso Diels-Alder adducts **3**.



All the racemic samples were prepared by mixing the nitroso compounds **1c,j** (0.1 mmol) with the dienes **2i-p** (0.12 mmol) in CH<sub>2</sub>Cl<sub>2</sub> at -20 to 0°C.

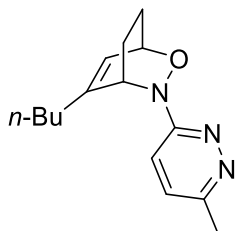

**3ij**: According to GP 2. 25.5 mg, 98%.  $[\alpha]_D^{25} - 74.3$  ( $c = 1.4$  CHCl<sub>3</sub>, 0.4:99.6 e.r.).

<sup>1</sup>H NMR (CDCl<sub>3</sub>, 400MHz):  $\delta = 7.09 - 7.13$  (m, 1 H), 7.04 - 7.09 (m, 1 H), 5.93 - 6.07 (m, 1 H), 5.28 - 5.42 (m, 1 H), 4.70 - 4.72 (m, 1 H), 2.56 (s, 3 H), 2.00 - 2.30 (m, 4 H), 1.48 - 1.65 (m, 1 H), 1.13 - 1.42 (m, 5 H), 0.80 (t,  $J=7.3$  Hz, 3 H) ppm. <sup>13</sup>C NMR (CDCl<sub>3</sub>, 101 MHz):  $\delta = 165.0, 153.9, 146.8, 128.1, 122.1, 116.9, 71.0, 55.9, 34.5, 28.8, 25.5, 22.3, 21.6, 20.8, 14.0$  ppm. HRMS (FAB): Calculated for C<sub>15</sub>H<sub>22</sub>N<sub>3</sub>O<sub>1</sub> ( $[M + H]^+$ ) is 260.1763, found 260.1764. HPLC analysis: Daicel Chiralpak IB-3, hexane/*i*-PrOH = 95/5, flow rate = 1.0 mL/min,  $\lambda = 254$  nm, retention time;  $t_R(\text{minor}) = 18.1$  min,  $t_R(\text{major}) = 25.3$  min.

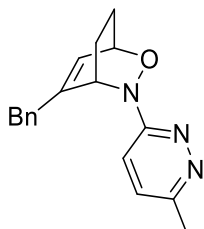

**3jj**: According to GP 2. 29 mg, 99%.  $[\alpha]_D^{25} - 68.0$  ( $c = 1.1$  CHCl<sub>3</sub>, 0.3:99.7 e.r.).

<sup>1</sup>H NMR (CDCl<sub>3</sub>, 400MHz):  $\delta = 7.01 - 7.30$  (m, 8 H), 5.87 - 5.98 (m, 1 H), 5.30 - 5.43 (m, 1 H), 4.62 - 4.76 (m, 1 H), 3.35 - 3.49 (m, 2 H), 2.61 (s, 3 H), 2.07 - 2.28 (m, 2 H), 1.28 - 1.48 (m, 2 H) ppm. <sup>13</sup>C NMR (CDCl<sub>3</sub>, 101 MHz):  $\delta = 165.0, 154.2, 145.9, 137.7, 129.4, 128.5, 128.1, 126.4, 123.4, 117.3, 71.2, 55.4, 41.6, 25.5, 21.6, 20.8$  ppm. HRMS (FAB): Calculated for C<sub>18</sub>H<sub>20</sub>N<sub>3</sub>O<sub>1</sub> ( $[M + H]^+$ ) is 294.1606, found 294.1610. HPLC analysis: Daicel Chiralpak IB-3, hexane/*i*-PrOH = 95/5, flow rate = 1.0 mL/min,  $\lambda = 254$  nm, retention time;  $t_R(\text{minor}) = 21.8$  min,  $t_R(\text{major}) = 28.7$  min.

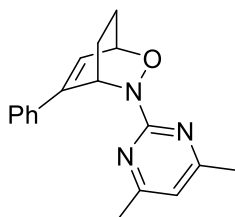

**3kc**: According to GP 2. 26 mg, 89%.  $[\alpha]_D^{26} + 208.3$  ( $c = 1.2$ , CHCl<sub>3</sub>, 96.6:3.4 e.r.).

<sup>1</sup>H NMR (CDCl<sub>3</sub>, 400MHz):  $\delta = 7.66 - 7.74$  (m, 2 H), 7.30 - 7.37 (m, 2 H), 7.23 - 7.30 (m, 1 H), 6.75 (dd,  $J=6.0, 2.3$  Hz, 1 H), 6.39 (s, 1 H), 5.96 (q,  $J=2.6$  Hz, 1 H), 5.05 - 5.08 (m, 1 H), 2.29 - 2.45 (m, 9 H), 1.60 - 1.75 (m, 1 H), 1.44 - 1.57 (m, 1 H) ppm. <sup>13</sup>C NMR (CDCl<sub>3</sub>, 101 MHz):  $\delta = 167.4, 143.7, 136.1, 128.5, 128.1, 125.8, 123.7, 112.6, 71.1, 52.3, 24.4, 24.1, 21.6$  ppm. HRMS (ESI): Calculated for C<sub>18</sub>H<sub>19</sub>N<sub>3</sub>NaO<sub>1</sub> ( $[M + Na]^+$ ) is 316.1420, found 316.1433. HPLC analysis: Daicel Chiralpak AD-H, hexane/*i*-PrOH = 96/4, flow rate = 1.0 mL/min,  $\lambda = 267$  nm, retention time;  $t_R(\text{major}) = 18.9$  min,  $t_R(\text{minor}) = 23.0$  min.

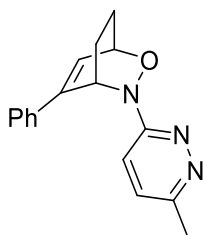

**3kj**: According to GP 2. 27.5 mg, 99%.  $[\alpha]_D^{25} + 140.0$  ( $c = 1.5$  CHCl<sub>3</sub>, 0.1:99.9 e.r.).

<sup>1</sup>H NMR (CDCl<sub>3</sub>, 400MHz):  $\delta = 7.51 - 7.70$  (m, 2 H), 7.29 - 7.37 (m, 2 H), 7.20 - 7.28 (m, 1 H), 7.02 - 7.15 (m, 2 H), 6.67 (dd,  $J=6.2, 2.3$  Hz, 1 H), 5.98 (q,  $J=2.7$  Hz, 1 H), 4.91 - 4.93 (m, 1 H), 2.52 (s, 3 H), 2.27 - 2.47 (m, 2 H), 1.57 - 1.84 (m, 2 H), 1.42 - 1.57 (m, 1 H) ppm. <sup>13</sup>C NMR (CDCl<sub>3</sub>, 101 MHz):  $\delta = 164.3, 154.0, 144.0, 135.9, 128.8, 128.3, 128.2, 125.8, 122.9, 116.5, 70.5, 54.5, 24.7, 21.5, 21.1$  ppm. HRMS (FAB): Calculated for C<sub>17</sub>H<sub>18</sub>N<sub>3</sub>O<sub>1</sub> ([M + H]<sup>+</sup>) is 280.1450, found 280.1458. HPLC analysis: Daicel Chiralpak IB-3, hexane/*i*-PrOH = 96/4, flow rate = 1.0 mL/min,  $\lambda = 254$  nm, retention time;  $t_R(\text{minor}) = 31.1$  min,  $t_R(\text{major}) = 43.5$  min.

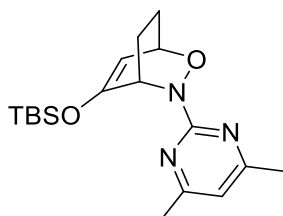

**3lc**: According to GP 2. 32 mg, 92%.  $[\alpha]_D^{26} + 30.0$  ( $c = 1.0$ , CHCl<sub>3</sub>, 1.9:98.1 e.r.).

<sup>1</sup>H NMR (CDCl<sub>3</sub>, 400MHz):  $\delta = 6.43$  (s, 1 H), 5.20 - 5.32 (m, 2 H), 4.96 - 4.99 (m, 1 H), 2.33 (s, 6 H), 2.11 - 2.29 (m, 2 H), 1.71 - 1.83 (m, 1 H), 1.38 - 1.49 (m, 1 H), 0.85 (s, 10 H), 0.09 (s, 3 H), -0.11 (s, 3 H) ppm. <sup>13</sup>C NMR (CDCl<sub>3</sub>, 101 MHz):  $\delta = 167.4, 154.6, 112.5, 102.0, 72.8, 56.3, 25.9, 25.6, 25.6, 24.2, 21.6, 18.0, -4.3, -5.3$  ppm. HRMS (ESI): Calculated for C<sub>18</sub>H<sub>29</sub>N<sub>3</sub>Na<sub>1</sub>O<sub>2</sub>Si<sub>1</sub> ([M + Na]<sup>+</sup>) is 370.1921, found 370.1936. HPLC analysis: Daicel Chiralpak AD-H, hexane/*i*-PrOH = 96/4, flow rate = 1.0 mL/min,  $\lambda = 267$  nm, retention time;  $t_R(\text{minor}) = 7.0$  min,  $t_R(\text{major}) = 7.7$  min.

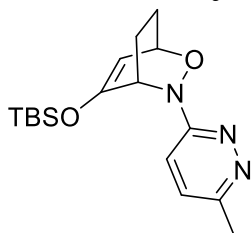

**3lj**: According to GP 2. 30 mg, 90%.  $[\alpha]_D^{26} - 22.2$  ( $c = 0.9$  CHCl<sub>3</sub>, 99.9:0.1 e.r.).

<sup>1</sup>H NMR (CDCl<sub>3</sub>, 400MHz):  $\delta = 7.12$  (s, 2 H), 5.27 (q,  $J=2.8$  Hz, 1 H), 5.17 (dd,  $J=6.6, 2.7$  Hz, 1 H), 4.77 - 4.88 (m, 1 H), 2.57 (s, 3 H), 2.08 - 2.29 (m, 2 H), 1.65 - 1.85 (m, 2 H), 1.38 - 1.48 (m, 2 H), 1.24 - 1.34 (m, 2 H), 0.81 (s, 9 H), 0.02 (s, 3 H), -0.15 (s, 3 H) ppm. <sup>13</sup>C NMR (CDCl<sub>3</sub>, 101 MHz):  $\delta = 165.0, 154.7, 154.0, 127.9, 116.6, 100.9, 72.4, 58.3, 26.3, 25.6, 21.5, 20.8, 18.1, -4.5, -5.2$  ppm. HRMS (FAB): Calculated for C<sub>17</sub>H<sub>28</sub>N<sub>3</sub>O<sub>2</sub>Si<sub>1</sub> ([M + H]<sup>+</sup>) is 334.1951, found 334.1945. HPLC analysis: Daicel Chiralpak IA-3, hexane/*i*-PrOH = 97/3, flow rate = 1.0 mL/min,  $\lambda = 254$  nm, retention time;  $t_R(\text{major}) = 12.5$  min,  $t_R(\text{minor}) = 15.9$  min.

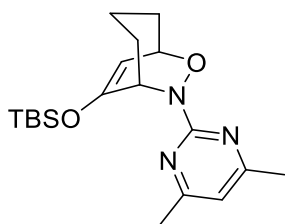

**3mc:** According to GP 2. 30 mg, 83%. 97.8:2.2 e.r.

$^1\text{H}$  NMR ( $\text{CDCl}_3$ , 400MHz):  $\delta$  = 6.39 (s, 1 H), 5.28 – 5.29 (m, 1 H), 4.98 – 5.01 (m, 1 H), 4.89 (dd,  $J$ =6.9, 2.5 Hz, 1 H), 2.33 (s, 6 H), 2.00 - 2.11 (m, 1 H), 1.88 - 1.98 (m, 1 H), 1.76 - 1.88 (m, 1 H), 1.67 - 1.76 (m, 1 H), 1.55 - 1.65 (m, 1 H), 1.41 – 1.52 (m, 1 H), 0.88 (s, 9 H), 0.11 (s, 3 H), -0.02 (s, 3 H) ppm.  $^{13}\text{C}$  NMR ( $\text{CDCl}_3$ , 101 MHz):  $\delta$  = 167.4, 164.7, 153.6, 111.8, 97.9, 74.9, 60.7, 32.4, 26.5, 25.6, 24.3, 18.9, 18.0, -4.5, -4.9 ppm. HRMS (ESI): Calculated for  $\text{C}_{19}\text{H}_{31}\text{N}_3\text{NaO}_2\text{Si}_1$  ( $[\text{M} + \text{Na}]^+$ ) is 384.2078, found 374.2083. HPLC analysis: Daicel Chiralpak AD-H, hexane/*i*-PrOH = 90/10, flow rate = 1.0 mL/min,  $\lambda$  = 254 nm, retention time;  $t_{\text{R}}(\text{major})$  = 20.6 min,  $t_{\text{R}}(\text{minor})$  = 21.9 min.

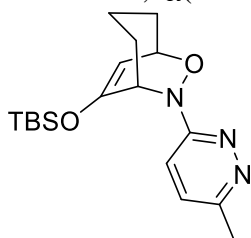

**3mj:** According to GP 2. 32 mg, 92%.  $[\alpha]_{\text{D}}^{25} + 57.1$  ( $c$  = 1.4  $\text{CHCl}_3$ , 99.9:0.1 e.r.).

$^1\text{H}$  NMR ( $\text{CDCl}_3$ , 400MHz):  $\delta$  = 7.18 (d,  $J$ =8.9 Hz, 1 H), 7.12 (d,  $J$ =9.2 Hz, 1 H), 5.35 (dd,  $J$ =7.3, 2.1 Hz, 1 H), 4.86 - 4.93 (m, 1 H), 4.80 (dd,  $J$ =7.1, 2.5 Hz, 1 H), 2.56 (s, 3 H), 2.06 - 2.22 (m, 1 H), 1.82 - 1.95 (m, 2 H), 1.68 - 1.78 (m, 1 H), 1.57 - 1.67 (m, 1 H), 1.41 - 1.55 (m, 1 H), 0.83 (s, 9 H), 0.03 (s, 3 H), -0.08 (s, 3 H) ppm.  $^{13}\text{C}$  NMR ( $\text{CDCl}_3$ , 101 MHz):  $\delta$  = 164.1, 154.1, 153.4, 128.1, 116.1, 96.5, 74.9, 62.6, 33.2, 26.0, 25.6, 21.5, 18.8, 18.1, -4.5, -4.9 ppm. HRMS (FAB): Calculated for  $\text{C}_{18}\text{H}_{30}\text{N}_3\text{O}_2\text{Si}_1$  ( $[\text{M} + \text{H}]^+$ ) is 348.2107, found 248.2103. HPLC analysis: Daicel Chiralpak AD-H, hexane/*i*-PrOH = 99/1, flow rate = 1.0 mL/min,  $\lambda$  = 267 nm, retention time;  $t_{\text{R}}(\text{major})$  = 15.2 min,  $t_{\text{R}}(\text{minor})$  = 21.9 min.

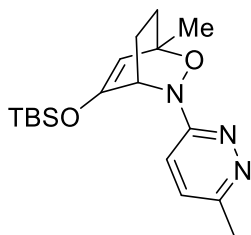

**3nj:** According to GP 2. 31 mg, 89%.  $[\alpha]_{\text{D}}^{25} + 30.0$  ( $c$  = 1.0  $\text{CHCl}_3$ , 99.8:0.2 e.r.).

$^1\text{H}$  NMR ( $\text{CDCl}_3$ , 400MHz):  $\delta$  = 7.07 - 7.14 (m, 2 H), 5.29 (s, 1 H), 5.24 (q,  $J$ =3.1 Hz, 1 H), 4.94 (d,  $J$ =2.5 Hz, 1 H), 2.57 (s, 3 H), 2.20 - 2.32 (m, 1 H), 1.99 – 1.92 (m, 1 H), 1.74 - 1.85 (m, 2 H), 1.48 - 1.52 (m, 3 H), 0.81 (s, 9 H), 0.02 (s, 3 H), -0.16 (s, 3 H) ppm.  $^{13}\text{C}$  NMR ( $\text{CDCl}_3$ , 101 MHz):  $\delta$  = 165.1, 154.7, 153.9, 127.9, 116.6, 105.0, 78.0, 58.4, 32.7, 25.6, 23.7, 22.0, 21.5, 18.1, -4.4, -5.1 ppm. HRMS (FAB): Calculated for  $\text{C}_{18}\text{H}_{30}\text{N}_3\text{O}_2\text{Si}_1$  ( $[\text{M} + \text{H}]^+$ ) is 348.2107, found 248.2103. HPLC analysis: Daicel Chiralpak IA-3, hexane/*i*-PrOH = 99/1, flow rate = 1.0 mL/min,  $\lambda$  = 254 nm, retention time;  $t_{\text{R}}(\text{major})$  = 9.3 min,  $t_{\text{R}}(\text{minor})$  = 12.6 min.

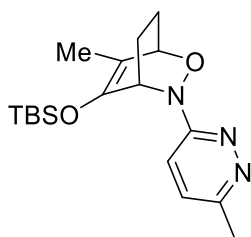

**3oj**: According to GP 2. 31 mg, 89%.  $[\alpha]_D^{25} - 55.0$  ( $c = 1.2$  CHCl<sub>3</sub>, 98.5:1.5 e.r.).

<sup>1</sup>H NMR (CDCl<sub>3</sub>, 400MHz):  $\delta = 7.02 - 7.17$  (m, 2 H), 5.22 (t,  $J=3.0$  Hz, 1 H), 4.63 (dd,  $J=3.7$ , 1.4 Hz, 1 H), 2.57 (s, 3 H), 2.14 - 2.28 (m, 1 H), 2.00 - 2.14 (m, 1 H), 1.60 - 1.74 (m, 4 H), 1.44 - 1.52 (m, 1 H), 0.89 (s, 9 H), 0.14 (s, 3 H), 0.05 (s, 3 H) ppm. <sup>13</sup>C NMR (CDCl<sub>3</sub>, 101 MHz):  $\delta = 164.3$ , 153.9, 147.3, 128.2, 116.4, 113.3, 57.6, 25.7, 25.3, 21.6, 21.6, 18.3, 12.1, -4.0, -4.2 ppm. HRMS (FAB): Calculated for C<sub>18</sub>H<sub>30</sub>N<sub>3</sub>O<sub>2</sub>Si<sub>1</sub> ( $[M + H]^+$ ) is 348.2107, found 248.2103. HPLC analysis: Daicel Chiralpak AD-H, hexane/*i*-PrOH = 99/1, flow rate = 1.0 mL/min,  $\lambda = 267$  nm, retention time;  $t_R$ (major) = 14.6 min,  $t_R$ (minor) = 30.7 min.

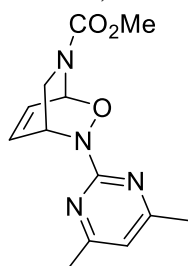

Mixture of product (>10:1 ratio).

**3pc**: According to GP 2. 23 mg, 83%.  $[\alpha]_D^{24} - 53.3$  ( $c = 1.1$  CHCl<sub>3</sub>, 99.4:0.6 e.r.).

<sup>1</sup>H NMR (CD<sub>3</sub>CN, 400MHz):  $\delta = 6.57 - 6.71$  (m, 2 H), 6.46 - 6.56 (m, 1 H), 6.05 - 6.19 (m, 1 H), 5.52 (br. s., 1 H), 3.62 - 3.88 (m, 4 H), 3.16 - 3.32 (m, 1 H), 2.30 (s, 6 H) ppm. <sup>13</sup>C NMR (CD<sub>3</sub>CN, 101 MHz):  $\delta = 168.8$ , 166.2, 131.6, 131.4, 131.0, 114.5, 77.3, 76.8, 53.3, 52.4, 45.5, 24.1 ppm. HRMS (ESI): Calculated for C<sub>13</sub>H<sub>16</sub>N<sub>4</sub>NaO<sub>2</sub> ( $[M + Na]^+$ ) is 299.1115, found 299.1122. HPLC analysis: Daicel Chiralpak AD-H, hexane/*i*-PrOH = 90/10, flow rate = 1.0 mL/min,  $\lambda = 254$  nm, retention time;  $t_R$ (major) = 35.6 min,  $t_R$ (minor) = 40.6 min.

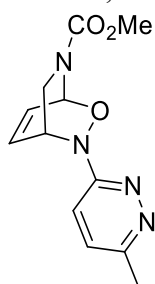

Mixture of product (2:1 ratio).

**3pj**: According to GP 2. 12 mg, 46%.  $[\alpha]_D^{25} - 83.5$  ( $c = 0.8$  CHCl<sub>3</sub>, 97.8:2.2 e.r.).

<sup>1</sup>H NMR (CDCl<sub>3</sub>, 400MHz):  $\delta = 7.15 - 7.22$  (m, 1 H), 7.04 - 7.14 (m, 1 H), 6.44 - 6.64 (m, 2 H), 6.03 - 6.28 (m, 1 H), 5.61 - 5.79 (m, 1 H), 3.98 - 3.94 (m, 1 H), 3.72 - 3.83 (m, 3 H), 3.23 - 3.39 (m, 1 H), 2.60 (s, 3 H) ppm. <sup>13</sup>C NMR (CDCl<sub>3</sub>, 101 MHz):  $\delta = 163.3$ , 155.3, 130.6, 130.3, 129.8, 128.6, 117.7, 76.0, 75.5, 53.0, 51.9, 51.8, 44.4, 21.6 ppm. HRMS (FAB): Calculated for C<sub>12</sub>H<sub>15</sub>N<sub>4</sub>O<sub>3</sub> ( $[M + H]^+$ ) is 263.1144, found 263.1134. HPLC analysis: Daicel Chiralpak AD-H, hexane/*i*-PrOH = 90/10, flow rate = 1.0 mL/min,  $\lambda = 260$  nm, retention time;  $t_R$ (major) = 39.2 min,  $t_R$ (minor) = 45.4 min.

#### 4. Enantioselective nitroso Diels-Alder reaction with racemic 2,6-disubstituted 1,3-cyclohexadienes **2q–u**.

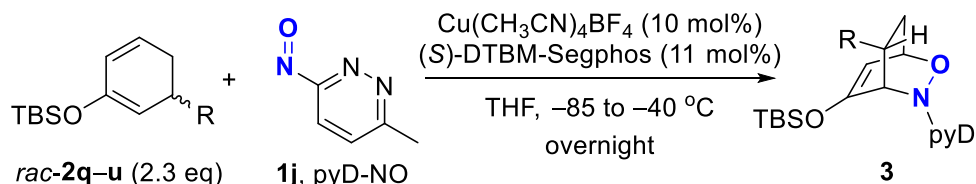

##### General procedure 3:

$\text{Cu}(\text{CH}_3\text{CN})_4\text{BF}_4$  (3.1 mg, 0.010 mmol) and (S)-DTBM-Segphos (13.0 mg, 0.011 mmol) were taken in an oven dried  $16 \times 150$  mm test tube equipped with a magnetic stir bar and a rubber septum. The test tube was evacuated and carefully purged with nitrogen. THF (1 mL) was added to it and the mixture was stirred for 1 h. After that the catalyst solution was placed on a  $-85$  °C bath. The nitroso compound **1j** (12.3 mg, 0.1 mmol) was then added and the wall of the test tube was rinsed with THF (0.5 mL). The mixture was further stirred for 10 min before the diene **2q–u** (0.23 mmol) was added. Then the reaction mixture was warmed to  $-40$  °C over ~2 h and stirred at  $-40$  °C overnight. It was then allowed to warm to  $0$  °C before directly loaded into a column packed with silica gel and purified using EtOAc/*n*-hexane/ $\text{NEt}_3$  (10:50:1 to 10:25:1) as eluent to afford the nitroso Diels-Alder adducts **3**.

All the racemic samples were prepared by mixing the nitroso compound **1j** (0.1 mmol) with the diene **2q–u** (0.12 mmol) in  $\text{CH}_2\text{Cl}_2$  at  $-20$  to  $0$  °C.

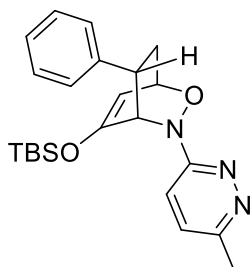

**3qj**: According to GP 3. 40 mg, 98%.  $[\alpha]_{\text{D}}^{26} + 31.0$  ( $c = 2.0$   $\text{CHCl}_3$ , 99.6:0.4 e.r.).

$^1\text{H}$  NMR ( $\text{CDCl}_3$ , 400 MHz):  $\delta = 7.25 - 7.33$  (m, 4 H), 7.11 - 7.24 (m, 3 H), 5.33 (t,  $J = 2.7$  Hz, 1 H), 5.25 (dd,  $J = 6.6, 2.7$  Hz, 1 H), 4.91 - 5.00 (m, 1 H), 3.66 - 3.70 (m, 1 H), 2.65 - 3.72 (m, 1 H), 2.58 (s, 3 H), 1.66 - 1.71 (m, 1 H), 0.69 (s, 9 H), -0.07 (s, 3 H), -0.21 (s, 3 H) ppm.  $^{13}\text{C}$  NMR ( $\text{CDCl}_3$ , 101 MHz):  $\delta = 164.8, 154.3, 153.1, 142.7, 128.5, 128.0, 128.0, 127.9, 126.8, 116.8, 100.4, 72.2, 63.7, 38.2, 35.3, 25.3, 21.5, 17.9, -4.8, -5.3$  ppm. HRMS (ESI): Calculated for  $\text{C}_{23}\text{H}_{32}\text{N}_3\text{O}_2\text{Si}$  ( $[\text{M} + \text{H}]^+$ ) is 410.2258, found 410.2254. HPLC analysis: Daicel Chiralpak AD-H, hexane/*i*-PrOH = 99/1, flow rate = 1.0 mL/min,  $\lambda = 260$  nm, retention time;  $t_{\text{R}}(\text{major}) = 24.7$  min,  $t_{\text{R}}(\text{minor}) = 28.7$  min.

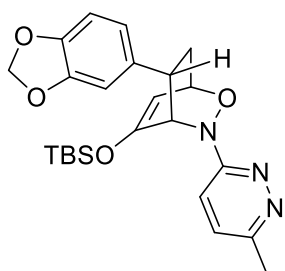

**3rj**: According to GP 3. 42 mg, 93%.  $[\alpha]_D^{25} + 22.2$  ( $c = 1.8$  CHCl<sub>3</sub>, 99.7:0.3 e.r.).

<sup>1</sup>H NMR (CDCl<sub>3</sub>, 400MHz):  $\delta = 7.11 - 7.18$  (m, 2 H), 6.69 - 6.78 (m, 3 H), 5.85 - 5.94 (m, 2 H), 5.20 - 5.27 (m, 2 H), 4.89 - 4.96 (m, 1 H), 3.56 - 3.70 (m, 1 H), 2.61 - 2.68 (m, 1 H), 2.57 (s, 3 H), 1.56 - 1.60 (m, 1 H), 0.71 (s, 9 H), -0.05 (s, 3 H), -0.19 (s, 3 H) ppm. <sup>13</sup>C NMR (CDCl<sub>3</sub>, 101 MHz):  $\delta = 164.8, 154.2, 153.1, 147.8, 146.3, 136.8, 127.9, 121.2, 116.8, 108.3, 108.2, 108.1, 101.0, 100.3, 72.1, 63.8, 38.0, 35.7, 25.6, 25.3, 21.5, 17.9, -4.9, -5.3$  ppm. HRMS (FAB): Calculated for C<sub>24</sub>H<sub>32</sub>N<sub>3</sub>O<sub>4</sub>Si<sub>1</sub> ([M + H]<sup>+</sup>) is 454.2162, found 454.2169. HPLC analysis: Daicel Chiralpak AD-H, hexane/*i*-PrOH = 99/1, flow rate = 1.0 mL/min,  $\lambda = 260$  nm, retention time;  $t_R(\text{major}) = 59.2$  min,  $t_R(\text{minor}) = 67.4$  min.

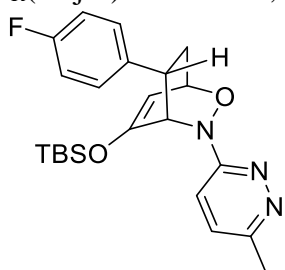

**3sj**: According to GP 3. 39 mg, 91%.  $[\alpha]_D^{25} + 11.1$  ( $c = 1.8$  CHCl<sub>3</sub>, 99.3:0.7 e.r.).

<sup>1</sup>H NMR (CDCl<sub>3</sub>, 400MHz):  $\delta = 7.20 - 7.26$  (m, 2 H), 7.16 (d,  $J = 1.4$  Hz, 2 H), 6.92 - 7.01 (m, 2 H), 5.22 - 5.31 (m, 2 H), 4.93 - 4.95 (m, 1 H), 3.61 - 3.70 (m, 1 H), 2.64 - 2.70 (m, 1 H), 2.58 (s, 3 H), 1.60 - 1.74 (m, 1 H), 0.69 (s, 9 H), -0.07 (s, 3 H), -0.21 (s, 3 H) ppm. <sup>13</sup>C NMR (CDCl<sub>3</sub>, 101 MHz):  $\delta = 164.7, 163.1, 160.6, 154.3, 153.0, 138.5, 138.4, 129.5, 129.4, 127.9, 116.8, 115.3, 115.1, 100.5, 72.1, 63.6, 37.5, 35.4, 25.3, 21.5, 17.8, -4.8, -5.3$  ppm. <sup>19</sup>F NMR (CDCl<sub>3</sub>, 376 MHz):  $\delta = -116.51$  ppm. HRMS (ESI): Calculated for C<sub>23</sub>H<sub>31</sub>F<sub>1</sub>N<sub>3</sub>O<sub>2</sub>Si<sub>1</sub> ([M + H]<sup>+</sup>) is 428.2164, found 428.2168. HPLC analysis: Daicel Chiralpak AD-H, hexane/*i*-PrOH = 99/1, flow rate = 1.0 mL/min,  $\lambda = 260$  nm, retention time;  $t_R(\text{major}) = 27.2$  min,  $t_R(\text{minor}) = 31.8$  min.

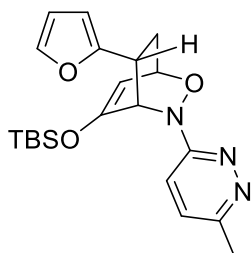

**3tj**: According to GP 3. 37 mg, 93%.  $[\alpha]_D^{25} - 17.5$  ( $c = 0.8$  CHCl<sub>3</sub>, 99.5:0.5 e.r.).

<sup>1</sup>H NMR (CDCl<sub>3</sub>, 400MHz):  $\delta = 7.31$  (d,  $J = 1.1$  Hz, 1 H), 7.15 (s, 2 H), 6.27 (dd,  $J = 3.2, 2.1$  Hz, 1 H), 6.04 - 6.11 (m, 1 H), 5.51 (t,  $J = 2.9$  Hz, 1 H), 5.15 (dd,  $J = 6.8, 2.6$  Hz, 1 H), 4.89 - 4.91 (m, 1 H), 3.69 - 3.77 (m, 1 H), 2.56 - 2.63 (m, 4 H), 1.64 - 1.68 (m, 1 H), 0.73 (s, 9 H), -0.09 (s, 3 H), -0.18 (s, 3 H) ppm. <sup>13</sup>C NMR (CDCl<sub>3</sub>, 101 MHz):  $\delta = 164.7, 155.9, 154.3, 153.0, 141.6, 127.9, 116.8, 110.2, 105.5, 100.1, 71.9, 61.5, 32.7, 32.3, 25.4, 21.5, 17.9, -4.9, -5.2$  ppm. HRMS (FAB): Calculated for C<sub>21</sub>H<sub>30</sub>N<sub>3</sub>O<sub>3</sub>Si<sub>1</sub> ([M + H]<sup>+</sup>) is 400.2056, found 400.2042. HPLC analysis: Daicel Chiralpak AD-H, hexane/*i*-PrOH = 99/1, flow rate = 1.0 mL/min,  $\lambda = 260$  nm, retention time;  $t_R(\text{major}) = 27.7$  min,  $t_R(\text{minor}) = 32.1$  min.

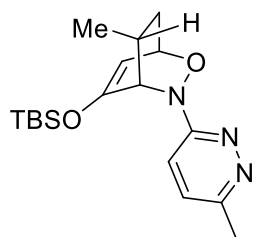

Mixture of products (4:1 ratio).

**3uj**: According to GP 3. 24 mg, 69%.  $[\alpha]_D^{25} - 36.4$  ( $c = 1.1$  CHCl<sub>3</sub>, 99.9:0.1 e.r.).

<sup>1</sup>H NMR (CDCl<sub>3</sub>, 400MHz):  $\delta = 7.12$  (s, 2 H), 5.04 - 5.13 (m, 2 H), 4.73 - 4.80 (m, 1 H), 2.57 (s, 3 H), 2.40 - 2.50 (m, 1 H), 2.31 - 2.40 (m, 1 H), 1.00 (d,  $J=7.1$  Hz, 3 H), 0.90 - 0.97 (m, 1 H), 0.80 (s, 9 H), 0.01 (s, 3 H), -0.15 (s, 3 H) ppm. <sup>13</sup>C NMR (CDCl<sub>3</sub>, 101 MHz):  $\delta = 164.9$ , 154.0, 153.4, 127.9, 116.6, 99.5, 72.1, 63.8, 35.2, 27.1, 25.5, 25.5, 21.5, 20.5, 18.0, -4.6, -5.2 ppm. HRMS (FAB): Calculated for C<sub>18</sub>H<sub>30</sub>N<sub>3</sub>O<sub>2</sub>Si<sub>1</sub> ( $[M + H]^+$ ) is 348.2107, found 248.2107. HPLC analysis: Daicel Chiralpak AD-H, hexane/*i*-PrOH = 99/1, flow rate = 1.0 mL/min,  $\lambda = 260$  nm, retention time;  $t_R(\text{major}) = 12.6$  min,  $t_R(\text{minor}) = 14.9$  min

## 5. Kinetic resolution of racemic diene **2r** via enantioselective NDA reaction.

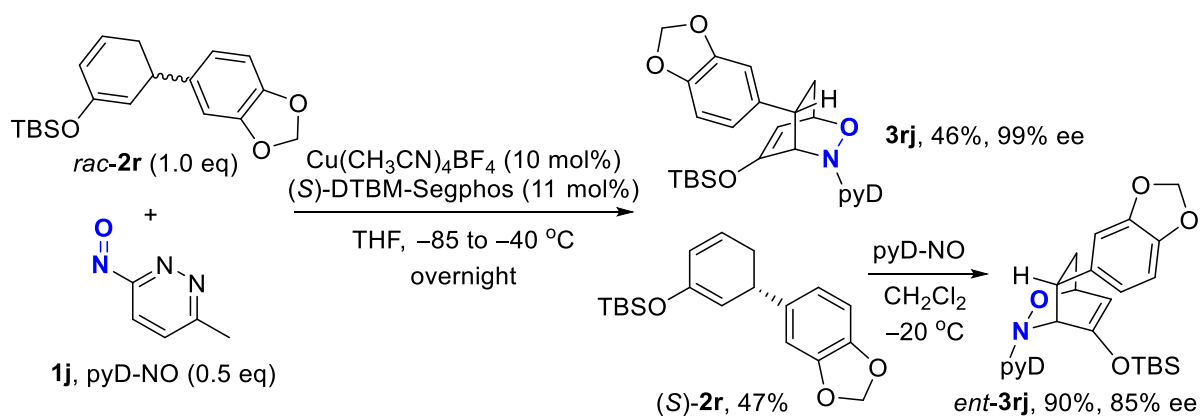

$\text{Cu}(\text{CH}_3\text{CN})_4\text{BF}_4$  (3.1 mg, 0.010 mmol) and (S)-DTBM-Segphos (13.0 mg, 0.011 mmol) were taken in an oven dried  $16 \times 150$  mm test tube equipped with a magnetic stir bar and a rubber septum. The test tube was evacuated and carefully purged with nitrogen. THF (1 mL) was added to it and the mixture was stirred for 1 h. After that the catalyst solution was placed on a  $-85$  °C bath. Nitroso compound **1j** (12.3 mg, 0.1 mmol) was then added and the wall of the test tube was rinsed with THF (0.5 mL). The mixture was further stirred for 10 min before the diene **2r** (0.20 mmol) was added. Then the reaction mixture was warmed to  $-40$  °C over ~2 h and stirred at  $-40$  °C overnight. It was then allowed to warm to  $0$  °C before directly loaded into a column packed with silica gel and purified using EtOAc/*n*-hexane/ $\text{NEt}_3$  (10:40:1 to 10:20:1) as eluent to afford the nitroso Diels-Alder adduct **3rj** (41.7 mg, 46% yield, 99% ee) and the yield of the unreacted diene (S)-**2r** was 32 mg (47%).

To a  $\text{CH}_2\text{Cl}_2$  solution (2 mL) of the diene (S)-**2r** (32 mg, 0.094 mmol) at  $-20$  °C, the nitroso compound **1j** (12.3 mg, 0.1 mmol) was added and the mixture was stirred at that temperature for 16 h before purified by column chromatography using EtOAc/*n*-hexane/ $\text{NEt}_3$  (10:40:1 to 10:20:1) to yield **ent-3rj** (38.4 mg, 90% yield, 85% ee).

Calculation of the selectivity factor (*s*):

$$\text{conversion } c = \frac{\text{ees}}{\text{ees} + \text{eep}} = 0.4619$$

ees = ee of the recovered substrate  
eep = ee of the product

$$\text{selectivity factor (s)} = \frac{\ln [(1-c)(1-\text{ees})]}{\ln [(1-c)(1+\text{ees})]} = \frac{\ln [(1-0.462)(1-0.85)]}{\ln [(1-0.462)(1+0.85)]} = \frac{\ln 0.0807}{\ln 0.9953} = \frac{-2.517}{-0.0047} = 534$$



## 6. Enantioselective NDA reaction of *rac*-**2v,w**.

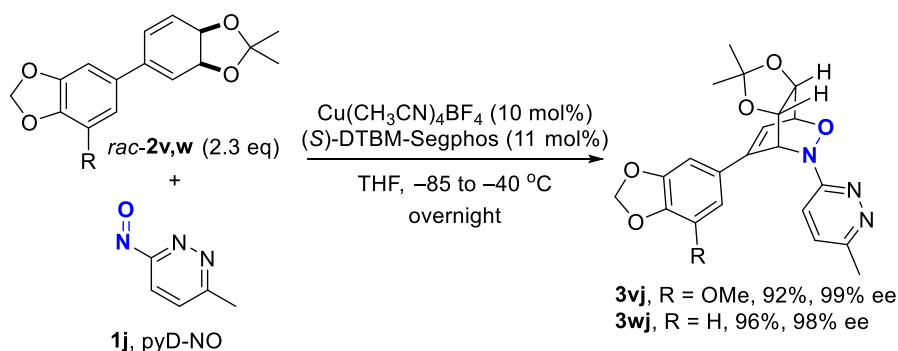

### General procedure 4:

$\text{Cu}(\text{CH}_3\text{CN})_4\text{BF}_4$  (3.1 mg, 0.010 mmol) and (S)-DTBM-Segphos (13.0 mg, 0.011 mmol) were taken in an oven dried  $16 \times 150$  mm test tube equipped with a magnetic stir bar and a rubber septum. The test tube was evacuated and carefully purged with nitrogen. THF (1 mL) was added to it and the mixture was stirred for 1 h. After that the catalyst solution was placed on a  $-85$  °C bath. The nitroso compound **1j** (12.3 mg, 0.1 mmol) was then added and the wall of the test tube was rinsed with THF (0.5 mL). The mixture was further stirred for 10 min before the dienes **2v,w** (0.23 mmol) was added. Then the reaction mixture was warmed to  $-40$  °C over ~2 h and stirred at  $-40$  °C overnight. It was then allowed to warm to  $-20$  °C before directly loaded into a column packed with silica gel and purified using EtOAc/*n*-hexane/ $\text{NEt}_3$  (10:40:1 to 10:20:1) as eluent to afford the nitroso Diels-Alder adducts **3**.

All the racemic samples were prepared by mixing the nitroso compounds **1j** (0.1 mmol) with the dienes **2v,w** (0.12 mmol) in  $\text{CH}_2\text{Cl}_2$  at  $-20$  to  $0$  °C.

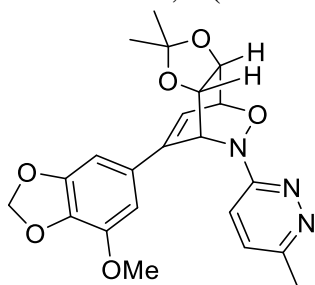

**3vj**: According to GP 4. 39 mg, 92%.  $[\alpha]_{\text{D}}^{25} + 195.0$  ( $c = 1.0$   $\text{CHCl}_3$ , 0.6:99.4 e.r.).

$^1\text{H}$  NMR ( $\text{CDCl}_3$ , 400MHz):  $\delta = 7.10 - 7.17$  (m, 2 H), 6.91 (d,  $J=1.4$  Hz, 1 H), 6.67 (d,  $J=1.4$  Hz, 1 H), 6.36 (dd,  $J=6.2, 2.1$  Hz, 1 H), 6.16 (dd,  $J=4.4, 2.5$  Hz, 1 H), 5.92 (dd,  $J=7.1, 1.4$  Hz, 2 H), 5.03 (dd,  $J=6.2, 4.4$  Hz, 1 H), 4.85 (dd,  $J=7.1, 4.4$  Hz, 1 H), 4.57 - 4.76 (m, 1 H), 3.94 (s, 3 H), 2.55 (s, 3 H), 1.34 (s, 3 H), 1.27 (s, 3 H) ppm.  $^{13}\text{C}$  NMR ( $\text{CDCl}_3$ , 101 MHz):  $\delta = 163.5, 154.9, 149.1, 143.8, 142.6, 135.7, 132.1, 128.4, 119.5, 116.9, 111.1, 106.0, 101.7, 99.9, 73.6, 73.5, 70.7, 58.3, 56.6, 26.0, 25.5, 21.6$  ppm. HRMS (FAB): Calculated for  $\text{C}_{22}\text{H}_{24}\text{N}_3\text{O}_6$  ( $[\text{M} + \text{H}]^+$ ) is 426.1659, found 426.1667. HPLC analysis: Daicel Chiralpak AD-H, hexane/*i*-PrOH = 80/20, flow rate = 1.0 mL/min,  $\lambda = 260$  nm, retention time;  $t_{\text{R}}(\text{minor}) = 13.5$  min,  $t_{\text{R}}(\text{major}) = 22.6$  min.

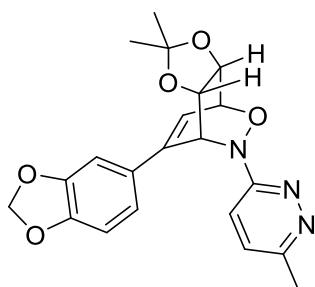

**3wj**: According to GP 4. 38 mg, 96%.  $[\alpha]_D^{25} + 170.59$  ( $c = 1.7$  CHCl<sub>3</sub>, 1.2:98.8 e.r.). <sup>1</sup>H NMR (CDCl<sub>3</sub>, 400MHz):  $\delta = 7.06 - 7.19$  (m, 3 H), 7.00 (d,  $J=1.8$  Hz, 1 H), 6.77 (d,  $J=8.0$  Hz, 1 H), 6.37 (dd,  $J=6.1, 2.2$  Hz, 1 H), 6.18 (dd,  $J=4.4, 2.5$  Hz, 1 H), 5.91 (dd,  $J=6.1, 1.5$  Hz, 2 H), 5.02 (dd,  $J=6.2, 4.4$  Hz, 1 H), 4.84 (dd,  $J=6.9, 4.4$  Hz, 1 H), 4.68 (dd,  $J=6.9, 3.9$  Hz, 1 H), 2.54 (s, 3 H), 1.34 (s, 3 H), 1.24 (s, 3 H) ppm. <sup>13</sup>C NMR (CDCl<sub>3</sub>, 101 MHz):  $\delta = 163.3, 154.7, 148.1, 148.1, 142.4, 131.4, 128.4, 120.2, 118.8, 117.0, 111.1, 108.6, 106.0, 101.2, 73.6, 70.7, 57.8, 26.0, 25.5, 21.5$  ppm. HRMS (ESI): Calculated for C<sub>21</sub>H<sub>22</sub>N<sub>3</sub>O<sub>5</sub> ( $[M + H]^+$ ) is 396.1554, found 396.1547. HPLC analysis: Daicel Chiralpak AD-H, hexane/*i*-PrOH = 80/20, flow rate = 1.0 mL/min,  $\lambda = 254$  nm, retention time;  $t_R$ (minor) = 18.4 min,  $t_R$ (major) = 34.7 min.

## 7. Synthesis of benzyl ((1S,4R)-4-((tert-butyldiphenylsilyl)oxy)cyclohex-2-en-1-yl)carbamate **4a**.

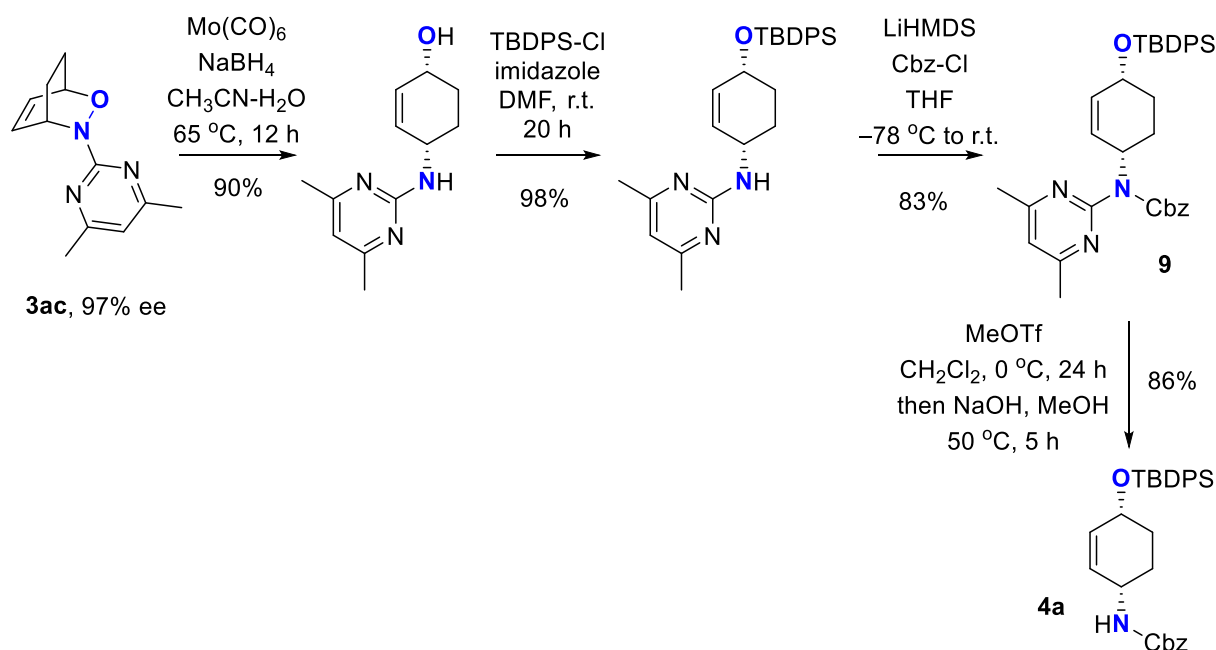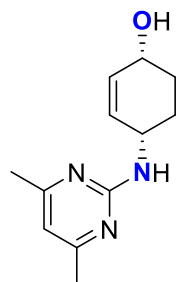

Mo(CO)<sub>6</sub> (177 mg, 0.67 mmol) followed by NaBH<sub>4</sub> (30 mg, 0.79 mmol) were added to a solution (CH<sub>3</sub>CN-H<sub>2</sub>O, 9:1, 10 mL) of **3ac** (145 mg, 0.67 mmol) and the mixture was heated to 65 °C and stirred at that temperature for 12 h. It was then evaporated and the crude residue

was purified by column chromatography using acetone/*n*-hexane (1:1) as eluent to obtain (1*R*,4*S*)-4-((4,6-dimethylpyrimidin-2-yl)amino)cyclohex-2-en-1-ol (133 mg, 90%).

$[\alpha]_{\text{D}}^{25} -55.0$  ( $c = 1.6$  CHCl<sub>3</sub>).

<sup>1</sup>H NMR (CDCl<sub>3</sub>, 400MHz):  $\delta = 6.28$  (s, 1 H), 5.85 - 5.97 (m, 1 H), 5.74 - 5.85 (m, 1 H), 5.15 (d,  $J=8.5$  Hz, 1 H), 4.52 - 4.56 (m, 1 H), 4.10 - 4.25 (m, 1 H), 3.22 (br. s., 1 H), 2.25 (s, 6 H), 1.66 - 1.96 (m, 4 H) ppm. <sup>13</sup>C NMR (CDCl<sub>3</sub>, 101 MHz):  $\delta = 167.6, 161.6, 132.3, 131.7, 131.7, 109.9, 64.7, 46.1, 29.3, 25.4, 24.0$  ppm. HRMS (ESI): Calculated for C<sub>12</sub>H<sub>37</sub>N<sub>3</sub>NaO<sub>1</sub> ([M + Na]<sup>+</sup>) is 242.1264, found 242.1260.

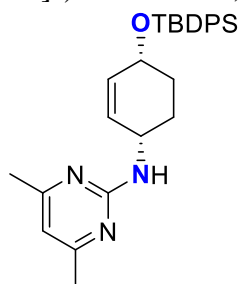

Imidazole (125 mg, 1.82 mmol) and TBDPS-Cl (204  $\mu$ L, 217 mg, 0.788 mmol) were added to a solution (DMF, 2 mL) of (1*R*,4*S*)-4-((4,6-dimethylpyrimidin-2-yl)amino)cyclohex-2-en-1-ol (133 mg, 0.61 mmol) and the mixture was allowed to stir at room temperature for 20 h. Saturated NaHCO<sub>3</sub> (5 mL) was then added and the mixture was extracted in EtOAc. Combined organic layer was washed with water, dried over Na<sub>2</sub>SO<sub>4</sub>, evaporated and then purified by column chromatography using EtOAc/*n*-hexane (3/1) as eluent to yield N-((1*S*,4*R*)-4-((tert-butylidiphenylsilyl)oxy)cyclohex-2-en-1-yl)-4,6-dimethylpyrimidin-2-amine (273 mg, 98%).

$[\alpha]_{\text{D}}^{25} -5.88$  ( $c = 1.7$ , CHCl<sub>3</sub>). <sup>1</sup>H NMR (CDCl<sub>3</sub>, 400MHz):  $\delta = 7.62 - 7.76$  (m, 4 H), 7.33 - 7.52 (m, 6 H), 6.30 (s, 1 H), 5.72 (s, 2 H), 5.06 (d,  $J=8.7$  Hz, 1 H), 4.43 - 4.60 (m, 1 H), 4.12 - 4.27 (m, 1 H), 2.27 (s, 6 H), 1.62 - 1.90 (m, 4 H), 1.08 (s, 9 H) ppm. <sup>13</sup>C NMR (CDCl<sub>3</sub>, 101 MHz):  $\delta = 167.6, 161.8, 136.0, 135.9, 134.5, 133.1, 130.3, 129.7, 127.7, 109.8, 66.6, 45.8, 29.3, 27.1, 25.8, 24.1, 19.3$  ppm. HRMS (FAB): Calculated for C<sub>28</sub>H<sub>36</sub>N<sub>3</sub>O<sub>1</sub>Si<sub>1</sub> ([M + H]<sup>+</sup>) is 458.2628, found 458.2626.

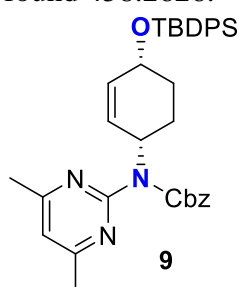

To a solution (THF, 6 mL) of N-((1*S*,4*R*)-4-((tert-butylidiphenylsilyl)oxy)cyclohex-2-en-1-yl)-4,6-dimethylpyrimidin-2-amine (273 mg, 0.596 mmol) at  $-78$  °C, LiHMDS (0.89 mL, 1 M in THF) was added dropwise and the mixture was allowed to stir at  $-78$  °C for 10 min. Then Cbz-Cl (0.17 mL, 203 mg, 1.19 mmol) was added and the mixture was allowed to warm to room temperature. The reaction was quenched with saturated NaHCO<sub>3</sub> solution (5 mL), extracted in CH<sub>2</sub>Cl<sub>2</sub>, dried over Na<sub>2</sub>SO<sub>4</sub>, and purified by column chromatography using EtOAc/*n*-hexane (3/1) as eluent to yield **9** (293 mg, 83%).

$[\alpha]_{\text{D}}^{25} +8.57$  ( $c = 2.7$ , CHCl<sub>3</sub>). <sup>1</sup>H NMR (CDCl<sub>3</sub>, 400MHz):  $\delta = 7.80 - 8.07$  (m, 4 H), 7.53 - 7.78 (m, 12 H), 6.10 (dd,  $J=10.2, 2.4$  Hz, 1 H), 5.85 - 5.89 (m, 1 H), 5.41 - 5.62 (m, 2 H), 5.13 - 5.33 (m, 1 H), 4.39 (d,  $J=3.4$  Hz, 1 H), 2.82 (s, 6 H), 2.61 - 2.76 (m, 1 H), 2.11 - 2.29 (m, 2 H), 1.80 - 1.94 (m, 1 H), 1.33 (s, 9 H) ppm. <sup>13</sup>C NMR (CDCl<sub>3</sub>, 101 MHz):  $\delta = 168.4, 159.0, 155.0, 136.7, 135.9, 135.9, 134.6, 134.4, 131.0, 130.7, 129.7, 129.6, 128.4, 127.8, 127.7, 127.6, 118.3,$

77.5, 77.2, 76.8, 67.4, 64.5, 54.8, 30.3, 27.0, 24.0, 23.4, 19.3 ppm. HRMS (FAB): Calculated for  $C_{36}H_{42}N_3O_3Si_1$  ( $[M + H]^+$ ) is 592.2995, found 592.2988.

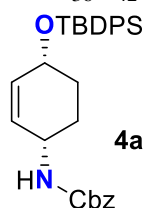

MeOTf (13.1 mL, 19.7 mg, 0.12 mmol) was added to a solution ( $CH_2Cl_2$ , 2 mL) of **9** (59.2 mg, 0.10 mmol) at 0 °C and the reaction mixture was stirred at that temperature for 20 h. Then the solvent was evaporated and added MeOH (1 mL) and NaOH (0.8 mL, 2 M solution in water) and the mixture was then heated to 50 °C and stirred at that temperature for 5 h. Then MeOH was evaporated and the organics were extracted in  $CH_2Cl_2$ , dried over  $Na_2SO_4$ , concentrated, and purified by column chromatography using EtOAc/*n*-hexane (4/1) as eluent to yield **4a** (42 mg, 86%).

$[\alpha]_D^{25}$  -5.0 ( $c = 2.0$ ,  $CHCl_3$ ).  $^1H$  NMR ( $CDCl_3$ , 400MHz):  $\delta = 7.62 - 7.74$  (m, 4 H), 7.29 - 7.49 (m, 11 H), 5.72 (d,  $J=9.8$  Hz, 1 H), 5.60 (dd,  $J=10.1, 2.7$  Hz, 1 H), 5.03 - 5.20 (m, 2 H), 4.78 (d,  $J=8.5$  Hz, 1 H), 4.17 (br. s., 1 H), 4.04 - 4.14 (m, 1 H), 1.62 - 1.84 (m, 4 H), 1.07 (s, 9 H) ppm.  $^{13}C$  NMR ( $CDCl_3$ , 101 MHz):  $\delta = 155.8, 136.7, 136.0, 135.9, 134.3, 134.3, 133.9, 129.8, 129.2, 128.7, 128.3, 127.7, 77.5, 77.2, 76.8, 66.8, 66.4, 46.2, 29.0, 27.1, 26.1, 19.3$  ppm. HRMS (ESI): Calculated for  $C_{30}H_{36}N_1O_3Si_1$  ( $[M + H]^+$ ) is 486.2464, found 486.2479.

## 8. Formal synthesis tetraacetylated conduramine A-1 (**5**).

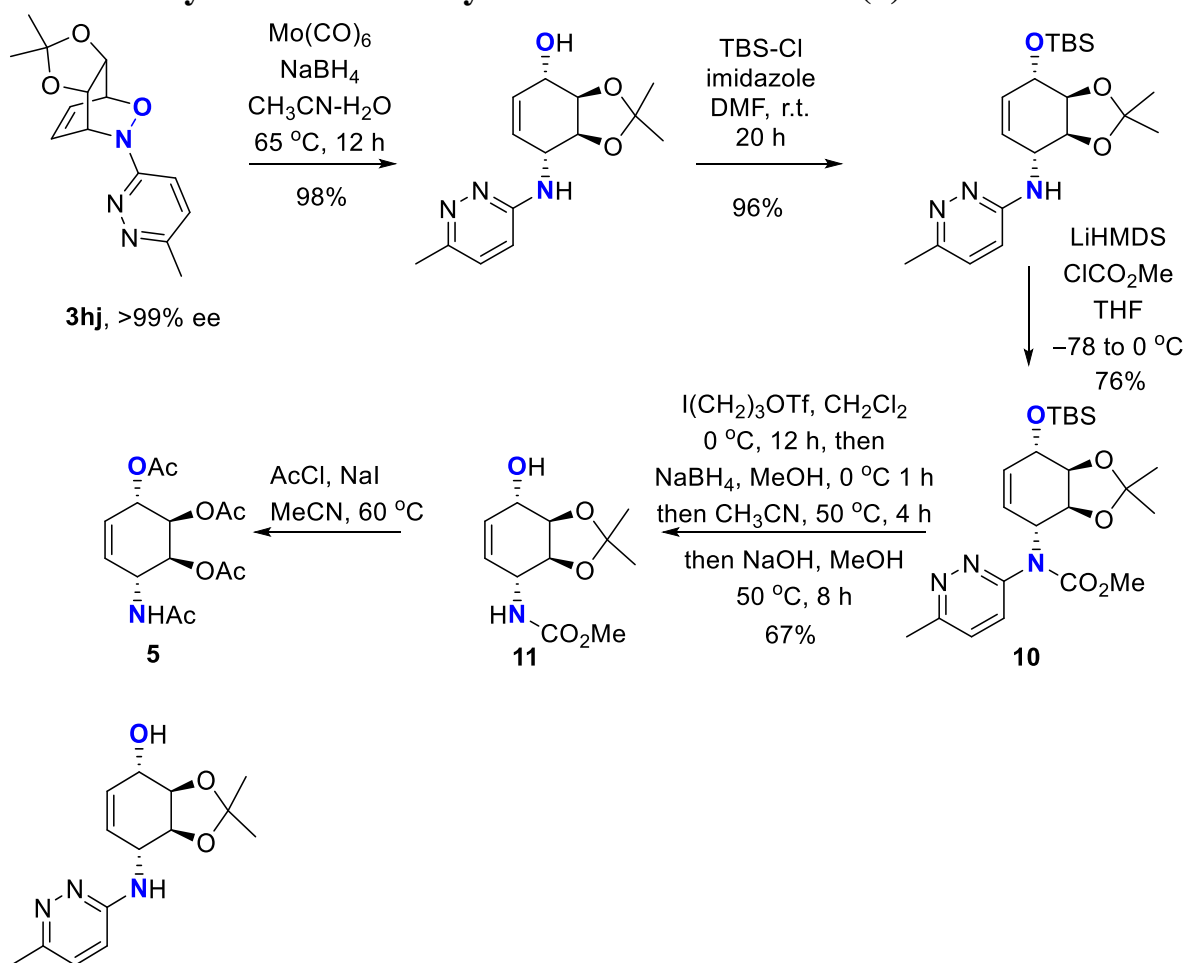

$Mo(CO)_6$  (116 mg, 0.44 mmol) followed by  $NaBH_4$  (17 mg, 0.45 mmol) were added to a solution ( $CH_3CN-H_2O$ , 9:1, 6 mL) of **3hj** (110 mg, 0.4 mmol) and the mixture was heated to

65 °C and stirred at that temperature for 12 h. Then the mixture was evaporated and the crude residue was purified by column chromatography using acetone/*n*-hexane (1:1) as eluent to obtain (3aR,4S,7R,7aS)-2,2-dimethyl-7-((6-methylpyridazin-3-yl)amino)-3a,4,7,7a-tetrahydrobenzo[d][1,3]dioxol-4-ol (109 mg, 98%).

<sup>1</sup>H NMR (CDCl<sub>3</sub>, 400MHz): δ = 7.08 (d, *J*=8.9 Hz, 1 H), 6.73 (d, *J*=8.7 Hz, 1 H), 5.95 - 6.09 (m, 1 H), 5.83 - 5.86 (m, 1 H), 5.69 (br. s., 1 H), 4.21 - 4.42 (m, 4 H), 2.51 (s, 3 H), 1.46 (s, 3 H), 1.35 (s, 3 H) ppm. <sup>13</sup>C NMR (CDCl<sub>3</sub>, 101 MHz): δ = 157.5, 151.6, 131.3, 129.3, 128.9, 114.8, 109.2, 79.5, 68.8, 52.5, 27.3, 25.0, 21.3 ppm. HRMS (FAB): Calculated for C<sub>14</sub>H<sub>20</sub>N<sub>3</sub>O<sub>3</sub> ([M + H]<sup>+</sup>) is 278.1505, found 278.1499.

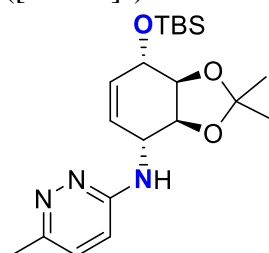

Imidazole (41 mg, 0.60 mmol) and TBS-Cl (38 mg, 0.25 mmol) were added to a solution (DMF, 1 mL) of (3aR,4S,7R,7aS)-2,2-dimethyl-7-((6-methylpyridazin-3-yl)amino)-3a,4,7,7a-tetrahydrobenzo[d][1,3]dioxol-4-ol (55 mg, 0.20 mmol) and the mixture was allowed to stir at room temperature for 20 h. Saturated NaHCO<sub>3</sub> (2 mL) was then added and the mixture was extracted in EtOAc. Combined organic layer was washed with water, dried over Na<sub>2</sub>SO<sub>4</sub>, evaporated and then purified by column chromatography using EtOAc/*n*-hexane (3/1) as eluent to yield N-((3aS,4R,7S,7aS)-7-((tert-butyldimethylsilyl)oxy)-2,2-dimethyl-3a,4,7,7a-tetrahydrobenzo[d][1,3]dioxol-4-yl)-6-methylpyridazin-3-amine (75 mg, 96%).

[α]<sub>D</sub><sup>24</sup> -17.65 (*c* = 1.7, CHCl<sub>3</sub>). <sup>1</sup>H NMR (CDCl<sub>3</sub>, 400MHz): δ = 7.00 (d, *J*=9.2 Hz, 1 H), 6.58 (d, *J*=9.2 Hz, 1 H), 5.87 - 6.02 (m, 2 H), 5.09 (d, *J*=8.5 Hz, 1 H), 4.56 - 4.69 (m, 1 H), 4.35 (dd, *J*=6.8, 4.5 Hz, 1 H), 4.17 - 4.29 (m, 2 H), 2.50 (s, 3 H), 1.40 (s, 3 H), 1.30 (s, 3 H), 0.92 (s, 10 H), 0.07 - 0.18 (m, 6 H) ppm. <sup>13</sup>C NMR (CDCl<sub>3</sub>, 101 MHz): δ = 157.1, 151.7, 132.5, 130.5, 128.3, 114.8, 108.7, 79.5, 69.1, 50.1, 26.9, 26.0, 24.7, 21.5, 18.2, -4.6, -4.6 ppm. *m/z* = HRMS (ESI): Calculated for C<sub>20</sub>H<sub>34</sub>N<sub>3</sub>O<sub>3</sub>Si<sub>1</sub> ([M + H]<sup>+</sup>) is 392.2369, found 392.2363.

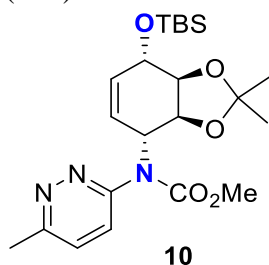

LiHMDS (0.24 mL, 1 M in THF) was added dropwise to a stirred THF solution (1 mL) N-((3aS,4R,7S,7aS)-7-((tert-butyldimethylsilyl)oxy)-2,2-dimethyl-3a,4,7,7a-tetrahydrobenzo[d][1,3]dioxol-4-yl)-6-methylpyridazin-3-amine (65 mg, 0.17 mmol) at -78 °C and the mixture was allowed to stir at -78 °C for another 10 min. Then ClCO<sub>2</sub>Me (14 μL, 17 mg, 0.18 mmol) was added and the mixture was then allowed to warm to 0 °C and stirred at 0 °C for 10 h. The reaction was quenched with saturated NaHCO<sub>3</sub> solution (5 mL), extracted in EtOAc, dried over Na<sub>2</sub>SO<sub>4</sub>, and purified by column chromatography using EtOAc/*n*-hexane (3/1) as eluent to yield **10** (57 mg, 76%).

[α]<sub>D</sub><sup>25</sup> -6.45 (*c* = 1.5, CHCl<sub>3</sub>). <sup>1</sup>H NMR (CDCl<sub>3</sub>, 400MHz): δ = 7.61 (d, *J*=8.9 Hz, 1 H), 7.30 (d, *J*=8.9 Hz, 1 H), 5.78 - 5.82 (m, 1 H), 5.60 - 5.67 (m, 1 H), 5.04 (dd, *J*=6.0, 2.7 Hz, 1 H), 4.50 - 4.58 (m, 1 H), 4.18 - 4.21 (m, 1 H), 4.08 (dd, *J*=7.3, 5.3 Hz, 1 H), 3.76 (s, 3 H), 2.67 (s, 3 H), 1.37 (s, 3 H), 1.29 (s, 3 H), 0.90 (m, 9 H), 0.11 (s, 3 H), 0.10 (s, 3 H) ppm. <sup>13</sup>C NMR

(CDCl<sub>3</sub>, 101 MHz):  $\delta$  = 158.1, 156.3, 155.3, 131.5, 128.0, 127.9, 125.9, 108.7, 80.5, 71.7, 59.6, 53.4, 27.6, 26.0, 25.6, 21.9, 18.3, -4.4, -4.8 ppm. HRMS (ESI): Calculated for C<sub>22</sub>H<sub>35</sub>N<sub>3</sub>NaO<sub>5</sub>Si<sub>1</sub> ([M + Na]<sup>+</sup>) is 472.2238, found 472.2231.

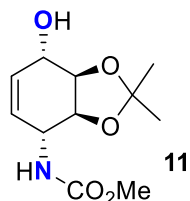

I(CH<sub>2</sub>)<sub>3</sub>OTf (35 mg, 0.11 mmol) was added to a stirred solution (CH<sub>2</sub>Cl<sub>2</sub>, 1 mL) of **10** (33 mg, 0.073 mmol) at 0 °C and the reaction mixture stirred at 0 °C for 12 h. NaBH<sub>4</sub> (13 mg, 0.35 mmol) and MeOH (1 mL) were then added and it was stirred at 0 °C for another 1 h before warm to r.t. The solvent was evaporated. CH<sub>3</sub>CN was added and the mixture was heated to 50 °C for 4 h. Then NaOH (0.7 mL, 2 M in water) and MeOH (1 mL) were added and the heating continued for another 8 h. Then the organic solvents were evaporated and the residue was extracted in CH<sub>2</sub>Cl<sub>2</sub>, dried over Na<sub>2</sub>SO<sub>4</sub>, purified by column chromatography using 1:1 acetone/*n*-hexane as eluent to yield **11** (12 mg, 67%).

$[\alpha]_D^{24}$  -58.0 (*c* = 1.0, CHCl<sub>3</sub>). NMR spectra matches with those in literature.

## 9. Formal synthesis of narciclasine **6a**.

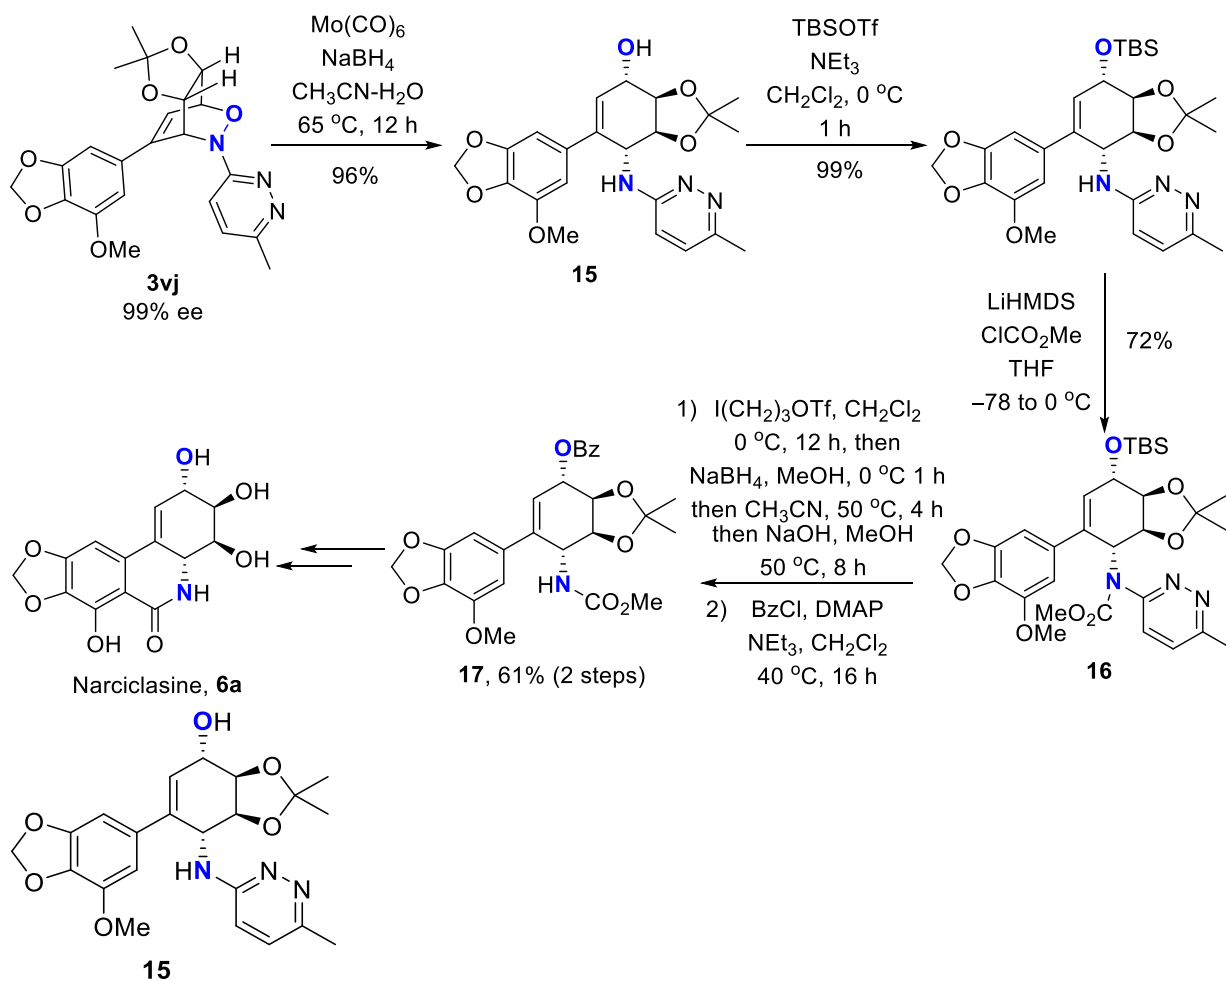

Mo(CO)<sub>6</sub> (29 mg, 0.11 mmol) followed by NaBH<sub>4</sub> (5.7 mg, 0.15 mmol) were added to a solution (CH<sub>3</sub>CN-H<sub>2</sub>O, 9:1, 3 mL) of **3vj** (43 mg, 0.1 mmol) and the mixture was heated to 65 °C and stirred at that temperature for 12 h. Then the mixture was evaporated and the crude

residue was purified by column chromatography using acetone/*n*-hexane (1:1) as eluent to obtain **15** (41 mg, 96%).

$[\alpha]_D^{25}$  –200.0 ( $c = 0.5$ ,  $\text{CHCl}_3$ ).  $^1\text{H}$  NMR ( $\text{CDCl}_3$ , 400MHz):  $\delta = 6.95 - 7.07$  (m, 1 H), 6.54 - 6.68 (m, 3 H), 6.27 - 6.45 (m, 1 H), 6.06 (d,  $J=8.7$  Hz, 1 H), 5.88 - 5.95 (m, 2 H), 5.05 - 5.20 (m, 1 H), 4.62 - 4.85 (m, 2 H), 4.39 - 4.62 (m, 2 H), 3.65 - 3.82 (m, 3 H), 2.50 (s, 3 H), 1.28 (s, 3 H), 1.32 (s, 3 H) ppm.  $^{13}\text{C}$  NMR ( $\text{CDCl}_3$ , 101 MHz):  $\delta = 156.9, 151.3, 151.2, 149.0, 143.6, 143.0, 142.7, 135.3, 135.1, 128.9, 126.1, 114.8, 108.2, 106.0, 101.6, 100.2, 77.4, 76.8, 65.7, 56.6, 51.5, 26.7, 24.6, 21.3$  ppm. HRMS (ESI): Calculated for  $\text{C}_{22}\text{H}_{36}\text{N}_3\text{O}_6$  ( $[\text{M} + \text{H}]^+$ ) is 428.1816, found 428.1822.

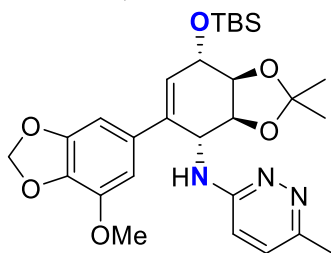

$\text{NEt}_3$  (21  $\mu\text{L}$ , 15 mg, 0.15 mmol) followed by TBSOTf (17.2  $\mu\text{L}$ , 20 mg, 0.075 mmol) were added to a stirred  $\text{CH}_2\text{Cl}_2$  solution (1 mL) of **15** at 0 °C stirred for 30 min. The ice bath was then removed and the mixture was stirred for 30 min before directly transferred to a column packed with  $\text{SiO}_2$  and purified using 1:1 EtOAc/*n*-hexane as eluent to yield **15-TBS** (27 mg, 99%).

$[\alpha]_D^{26}$  –125.0 ( $c = 1.2$ ,  $\text{CHCl}_3$ ).  $^1\text{H}$  NMR ( $\text{CDCl}_3$ , 400MHz):  $\delta = 6.99$  (d,  $J=8.9$  Hz, 1 H), 6.75 (d,  $J=1.6$  Hz, 1 H), 6.69 (d,  $J=1.6$  Hz, 1 H), 6.44 (d,  $J=8.9$  Hz, 1 H), 6.32 (d,  $J=6.2$  Hz, 1 H), 5.93 (q,  $J=1.5$  Hz, 2 H), 5.56 (dd,  $J=10.1, 1.8$  Hz, 1 H), 5.45 (d,  $J=10.1$  Hz, 1 H), 4.73 (dd,  $J=6.9, 2.1$  Hz, 1 H), 4.34 - 4.49 (m, 2 H), 3.83 (s, 3 H), 2.52 (s, 3 H), 1.25 - 1.35 (m, 6 H), 0.95 (s, 9 H), 0.19 (s, 3 H), 0.16 (s, 3 H) ppm.  $^{13}\text{C}$  NMR ( $\text{CDCl}_3$ , 101 MHz):  $\delta = 156.3, 151.5, 149.1, 143.9, 143.7, 135.4, 135.0, 128.4, 125.0, 115.0, 108.2, 106.2, 101.6, 100.2, 77.6, 76.8, 67.1, 56.8, 49.9, 26.5, 26.1, 24.5, 21.5, 18.3, -4.3, -4.7$  ppm. HRMS (ESI): Calculated for  $\text{C}_{28}\text{H}_{40}\text{N}_3\text{O}_6\text{Si}_1$  ( $[\text{M} + \text{H}]^+$ ) is 542.2681, found 542.2680.

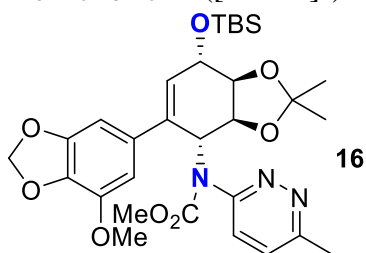

LiHMDS (75  $\mu\text{L}$ , 1 M in THF) was added dropwise to a stirred THF solution (1 mL) **15-TBS** (27 mg, 0.05 mmol) at –78 °C and the mixture was allowed to stir at –78 °C for another 10 min. Then  $\text{ClCO}_2\text{Me}$  (5.8  $\mu\text{L}$ , 7.1 mg, 0.075 mmol) was added and the mixture was then allowed to warm to 0 °C and stirred at 0 °C for 10 h. The reaction was quenched with saturated  $\text{NaHCO}_3$  solution (1 mL), extracted in EtOAc, dried over  $\text{Na}_2\text{SO}_4$ , and purified by column chromatography using EtOAc/*n*-hexane (2/1) as eluent to yield **16** (22 mg, 72%).

$[\alpha]_D^{26}$  –28.57 ( $c = 0.9$ ,  $\text{CHCl}_3$ ).  $^1\text{H}$  NMR ( $\text{CDCl}_3$ , 400MHz):  $\delta = 7.24$  (br. s., 1 H), 7.13 (d,  $J=9.2$  Hz, 1 H), 6.47 (br. s., 1 H), 6.39 (s, 1 H), 5.90 (dd,  $J=4.9, 1.5$  Hz, 2 H), 5.77 - 5.85 (m, 1 H), 5.65 (t,  $J=2.5$  Hz, 1 H), 4.86 - 5.02 (m, 1 H), 4.28 - 4.33 (m, 1 H), 4.22 - 4.27 (m, 1 H), 3.67 (s, 3 H), 3.63 (s, 3 H), 2.64 (s, 3 H), 1.36 (d,  $J=8.0$  Hz, 6 H), 0.92 (s, 9 H), 0.14 (s, 3 H), 0.12 (s, 3 H) ppm.  $^{13}\text{C}$  NMR ( $\text{CDCl}_3$ , 101 MHz):  $\delta = 157.3, 155.0, 148.5, 143.2, 134.5, 133.6, 130.6, 127.5, 125.1, 108.5, 106.5, 101.5, 101.5, 77.7, 76.8, 71.2, 59.4, 56.4, 53.4, 28.0, 26.1,$



21.8, 18.4, -4.3, -4.6 ppm. HRMS (FAB): Calculated for  $C_{30}H_{41}N_3O_8Si_1$  ( $[M + H]^+$ ) is 600.2741, found 600.2731.

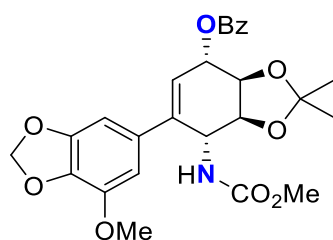

**17**, 61% (2 steps)

$I(CH_2)_3OTf$  (19 mg, 0.06 mmol) was added to a stirred solution ( $CH_2Cl_2$ , 1 mL) of **16** (30 mg, 0.05 mmol) at 0 °C and the reaction mixture stirred at 0 °C for 12 h.  $NaBH_4$  (9.5 mg, 0.25 mmol) and MeOH (1 mL) were then added and it was stirred at 0 °C for another 1 h before warm to r.t. The solvent was evaporated.  $CH_3CN$  was added and the mixture was heated to 50 °C for 4 h. Then NaOH (0.6 mL, 2 M in water) and MeOH (1 mL) were added and the heating continued for another 8 h. Then the organic solvents were evaporated and the residue was extracted in  $CH_2Cl_2$ , dried over  $Na_2SO_4$ , and filtered through a small pad of  $SiO_2$  using 1:1 acetone/*n*-hexane as eluent. The filtrate was then concentrated and the residue was dissolved in  $CH_2Cl_2$ . DMAP (1.2 mg, 0.01 mmol),  $NEt_3$  (21  $\mu$ L, 15 mg, 0.15 mmol) and  $PhCOCl$  (14 mg, 11.6 mL) were then added and the mixture was heated to 40 °C for 16 h. After cooling down to room temperature,  $NaHCO_3$  solution (1mL) was added and the organics were extracted in  $CH_2Cl_2$ , dried over  $Na_2SO_4$ , concentrated and purified using EtOAc/*n*-hexane (1/1) as eluent to yield **17** (15.2 mg, 61% 2 steps).

$[\alpha]_D^{26} -11.5$  ( $c = 1.0$ ,  $CHCl_3$ ).  $^1H$  NMR ( $C_6D_6$ , 400MHz):  $\delta = 8.09$  (d,  $J=6.9$  Hz, 2 H), 7.04 - 7.15 (m, 3 H), 6.90 - 6.94 (m, 1 H), 6.78 - 6.83 (m, 1 H), 6.28 (d,  $J=6.6$  Hz, 1 H), 5.86 (dd,  $J=6.5$ , 1.5 Hz, 1 H), 5.36 - 5.47 (m, 2 H), 5.26 (q,  $J=1.3$  Hz, 2 H), 4.55 (d,  $J=5.7$  Hz, 1 H), 4.36 (d,  $J=6.9$  Hz, 1 H), 3.49 (s, 3 H), 3.39 (s, 3 H), 1.30 (s, 4 H), 1.13 (s, 3 H) ppm.  $^{13}C$  NMR ( $CDCl_3$ , 101 MHz):  $\delta = 165.3$ , 156.5, 150.3, 145.9, 144.7, 136.9, 134.0, 133.7, 130.6, 130.3, 129.2, 121.6, 109.0, 107.4, 101.8, 100.8, 78.3, 75.3, 69.4, 56.6, 52.4, 50.8, 26.9, 24.8 ppm. HRMS (FAB): Calculated for  $C_{26}H_{27}N_1O_9$  ( $[M]^+$ ) is 497.1686, found 497.1678.

## 10. Effect of steric and electronic properties of nitroso compounds on nitroso Diels-Alder reaction.

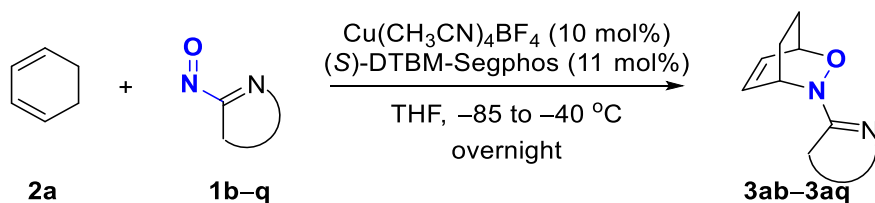

### General procedure 5:

$Cu(CH_3CN)_4BF_4$  (3.1 mg, 0.010 mmol) and (S)-DTBM-Segphos (13.0 mg, 0.011 mmol) were taken in an oven dried 16  $\times$  150 mm test tube equipped with a magnetic stir bar and a rubber septum. The test tube was evacuated and carefully purged with nitrogen. THF (1 mL) was added to it and the mixture was stirred for 1 h. After that the catalyst solution was placed on a -85 °C bath. Nitroso compound **1b-q** (0.1 mmol) was then added and the wall of the test tube was rinsed with THF (0.5 mL). The mixture was further stirred for 10 min before **2a** (11.5  $\mu$ L, 0.12 mmol) was added. Then the reaction mixture was warmed to -40 °C over ~2 h and stirred at -40 °C overnight. The mixture was then allowed to warm to 0 °C before it was directly



loaded into a column packed with silica gel and purified using EtOAc/*n*-hexane (1:1 to 3:1) to afford the nitroso Diels-Alder adducts **3**.

All the racemic samples were prepared by mixing the nitroso compounds **1b–q** (0.1 mmol) with the dienes **2a** (11.5  $\mu$ L, 0.12 mmol) in CH<sub>2</sub>Cl<sub>2</sub> at 0 °C.

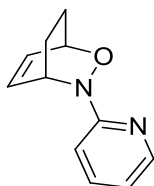

**3ab**: According to GP 5. 18.7 mg, 99%, 97:3 e.r.

NMR spectra matches with those reported in the literature.

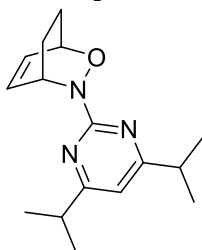

**3ad**: According to GP 5. 20 mg, 77%. 54.6:45.6 e.r.

<sup>1</sup>H NMR (CDCl<sub>3</sub>, 400MHz):  $\delta$  = 6.48 - 6.54 (m, 2 H), 6.46 (s, 1 H), 5.41 - 5.53 (m, 1 H), 4.82 - 4.85 (m, 1 H), 2.87 (spt,  $J$ =6.9 Hz, 2 H), 2.18 - 2.34 (m, 2 H), 1.53 - 1.63 (m, 1 H), 1.37 - 1.46 (m, 1 H), 1.22 (dd,  $J$ =6.9, 1.4 Hz, 12 H) ppm. <sup>13</sup>C NMR (CDCl<sub>3</sub>, 101 MHz):  $\delta$  = 176.5, 165.7, 132.8, 132.0, 106.5, 70.5, 50.4, 36.1, 24.2, 22.3, 21.8, 21.0 ppm.  $m/z$  = 273. HPLC analysis: Daicel Chiralpak AD-H, hexane/*i*-PrOH = 96/4, flow rate = 1.0 mL/min,  $\lambda$  = 267 nm, retention time;  $t_R$ (minor) = 16.5 min,  $t_R$ (major) = 17.4 min.

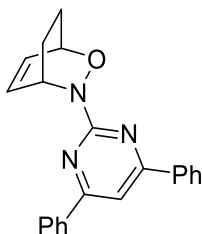

**3ae**: According to GP 5. 31 mg, 91%. 67.6:32.4 e.r.

<sup>1</sup>H NMR (CDCl<sub>3</sub>, 400MHz):  $\delta$  = 8.08 - 8.16 (m, 4 H), 7.55 (s, 1 H), 7.45 - 7.53 (m, 6 H), 6.62 - 6.66 (m, 1 H), 6.56 - 6.60 (m, 1 H), 5.64 - 5.75 (m, 1 H), 4.85 - 4.97 (m, 1 H), 2.28 - 2.46 (m, 2 H), 1.62 - 1.72 (m, 1 H), 1.44 - 1.56 (m, 1 H) ppm. <sup>13</sup>C NMR (CDCl<sub>3</sub>, 101 MHz):  $\delta$  = 166.4, 165.7, 137.9, 132.7, 132.2, 130.6, 128.8, 127.4, 105.6, 70.9, 50.5, 24.2, 21.1 ppm.  $m/z$  = 341. HPLC analysis: Daicel Chiralpak AD-H, hexane/*i*-PrOH = 95/5, flow rate = 1.0 mL/min,  $\lambda$  = 275 nm, retention time;  $t_R$ (major) = 20.1 min,  $t_R$ (minor) = 41.2 min.

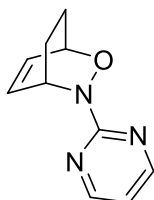

**3af**: According to GP 5. 17 mg, 90%. 91.9:8.1 e.r.

<sup>1</sup>H NMR (CDCl<sub>3</sub>, 400MHz):  $\delta$  = 8.41 (d,  $J$ =4.8 Hz, 2 H), 6.68 (t,  $J$ =4.7 Hz, 1 H), 6.41 - 6.59 (m, 2 H), 5.37 - 5.40 (m, 1 H), 4.85 - 4.88 (m, 1 H), 2.15 - 2.40 (m, 2 H), 1.56 - 1.63 (m, 1 H), 1.35 - 1.52 (m, 1 H) ppm. <sup>13</sup>C NMR (CDCl<sub>3</sub>, 101 MHz):  $\delta$  = 165.7, 157.9, 132.2, 132.1, 113.3, 71.0, 50.9, 24.0, 20.8 ppm.  $m/z$  = 189. HPLC analysis: Daicel Chiralpak OD-H, hexane/*i*-PrOH

= 85/15, flow rate = 1.0 mL/min,  $\lambda$  = 254 nm, retention time;  $t_R$ (major) = 26.8 min,  $t_R$ (minor) = 44.1 min.

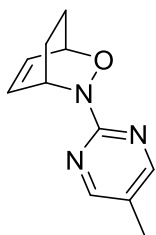

**3ag:** According to GP 5. 19 mg, 94%. 3.1:96.9 e.r.

$^1\text{H}$  NMR ( $\text{CDCl}_3$ , 400MHz):  $\delta$  = 8.25 (s, 2 H), 6.50 – 6.54 (m, 1 H), 6.43 – 6.47 (m, 1 H), 5.29 – 5.36 (m, 1 H), 4.71 – 4.93 (m, 1 H), 2.19 – 2.38 (m, 2 H), 2.15 (s, 3 H), 1.53 – 1.64 (m, 1 H), 1.32 – 1.48 (m, 1 H) ppm.  $^{13}\text{C}$  NMR ( $\text{CDCl}_3$ , 101 MHz):  $\delta$  = 164.8, 157.9, 132.2, 132.1, 132.0, 132.0, 122.4, 70.7, 51.4, 24.1, 20.8, 14.9 ppm.  $m/z$  = 203. HPLC analysis: Daicel Chiralpak AD-H, hexane/*i*-PrOH = 90/10, flow rate = 1.0 mL/min,  $\lambda$  = 267 nm, retention time;  $t_R$ (minor) = 10.2 min,  $t_R$ (major) = 12.0 min.

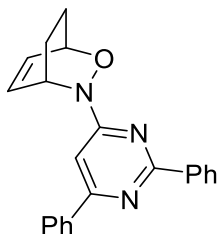

**3ah:** According to GP 5. 34 mg, 99%. Racemic.

$^1\text{H}$  NMR ( $\text{CDCl}_3$ , 400MHz):  $\delta$  = 8.47 – 8.65 (m, 2 H), 8.12 – 8.27 (m, 2 H), 7.38 – 7.58 (m, 6 H), 7.17 (s, 1 H), 6.44 – 6.59 (m, 2 H), 5.66 – 5.69 (m, 1 H), 4.72 – 4.92 (m, 1 H), 2.24 – 2.40 (m, 2 H), 1.61 – 1.74 (m, 1 H), 1.43 – 1.55 (m, 1 H) ppm.  $^{13}\text{C}$  NMR ( $\text{CDCl}_3$ , 101 MHz):  $\delta$  = 169.5, 164.3, 163.1, 138.4, 138.1, 132.6, 131.3, 130.4, 130.4, 128.8, 128.4, 128.4, 127.4, 127.4, 127.3, 100.7, 70.9, 51.2, 24.3, 20.6 ppm.  $m/z$  = 341. HPLC analysis: Daicel Chiralpak AD-H, hexane/*i*-PrOH = 99/1, flow rate = 1.0 mL/min,  $\lambda$  = 260 nm, retention time;  $t_R$  = 18.5 min,  $t_R$  = 26.7 min.

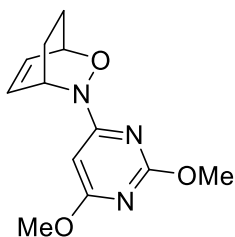

**3ai:** According to GP 5. 24 mg, 96%. 40.9:59.1 e.r.

$^1\text{H}$  NMR ( $\text{CDCl}_3$ , 400MHz):  $\delta$  = 6.45 – 6.49 (m, 1 H), 6.37 – 6.39 (m, 1 H), 5.82 (s, 1 H), 5.23 – 5.35 (m, 1 H), 4.71 – 4.73 (m, 1 H), 3.90 (s, 3 H), 3.87 (s, 3 H), 2.10 – 2.29 (m, 2 H), 1.47 – 1.61 (m, 1 H), 1.34 – 1.45 (m, 1 H) ppm.  $^{13}\text{C}$  NMR ( $\text{CDCl}_3$ , 101 MHz):  $\delta$  = 172.7, 171.1, 164.4, 131.7, 131.0, 84.8, 70.6, 54.5, 53.9, 53.8, 51.4, 51.4, 24.2, 20.4 ppm.  $m/z$  = 249. HPLC analysis: Daicel Chiralpak AD-H, hexane/*i*-PrOH = 95/5, flow rate = 1.0 mL/min,  $\lambda$  = 275 nm, retention time;  $t_R$ (minor) = 56.0 min,  $t_R$ (major) = 69.1 min.

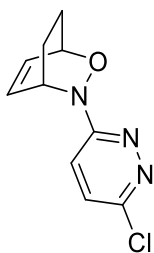

**3ak:** According to GP 5. 19 mg, 85%. 98.9:1.1 e.r.

$^1\text{H}$  NMR ( $\text{CDCl}_3$ , 400MHz):  $\delta$  = 7.27 (d,  $J$ =9.2 Hz, 1 H), 7.11 (d,  $J$ =9.2 Hz, 1 H), 6.36 - 6.62 (m, 2 H), 5.49 - 5.53 (m, 1 H), 4.73 - 4.75 (m, 1 H), 2.14 - 2.36 (m, 2 H), 1.59 - 1.71 (m, 1 H), 1.33 - 1.54 (m, 1 H) ppm.  $^{13}\text{C}$  NMR ( $\text{CDCl}_3$ , 101 MHz):  $\delta$  = 165.4, 149.8, 133.3, 131.2, 129.1, 119.6, 70.6, 70.6, 51.7, 24.3, 20.2, 20.2 ppm.  $m/z$  = 223. HPLC analysis: Daicel Chiralpak AD-H, hexane/*i*-PrOH = 98/2, flow rate = 1.0 mL/min,  $\lambda$  = 267 nm, retention time;  $t_R(\text{major})$  = 21.1 min,  $t_R(\text{minor})$  = 25.0 min.

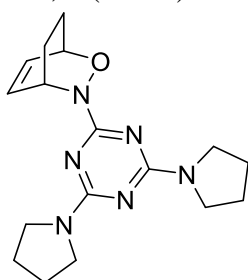

**3am:** According to GP 5. 28 mg, 85%. 65.4:34.6 e.r.

$^1\text{H}$  NMR ( $\text{CDCl}_3$ , 400MHz):  $\delta$  = 6.43 - 6.57 (m, 2 H), 5.29 - 5.42 (m, 1 H), 4.61 - 4.79 (m, 1 H), 3.50 (br. s., 8 H), 2.21 - 2.34 (m, 1 H), 2.10 - 2.20 (m, 1 H), 1.77 - 1.93 (m, 8 H), 1.50 (tt,  $J$ =12.0, 3.0 Hz, 1 H), 1.29 - 1.42 (m, 1 H) ppm.  $^{13}\text{C}$  NMR ( $\text{CDCl}_3$ , 101 MHz):  $\delta$  = 169.6, 163.6, 132.5, 131.7, 70.6, 49.3, 46.0, 25.3, 24.0, 21.0 ppm.  $m/z$  = 328. HPLC analysis: Daicel Chiralpak OD-H, hexane/*i*-PrOH = 90/10, flow rate = 1.0 mL/min,  $\lambda$  = 254 nm, retention time;  $t_R(\text{major})$  = 13.3 min,  $t_R(\text{minor})$  = 20.5 min.

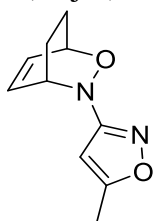

**3an:** According to GP 5. 18 mg, 94%. 61.9:38.1 e.r.

$^1\text{H}$  NMR ( $\text{CDCl}_3$ , 400MHz):  $\delta$  = 6.46 - 6.54 (m, 2 H), 5.70 (d,  $J$ =0.7 Hz, 1 H), 4.58 - 4.65 (m, 2 H), 2.29 (s, 3 H), 2.16 - 2.26 (m, 2 H), 1.48 - 1.59 (m, 1 H), 1.35 - 1.43 (m, 1 H) ppm.  $^{13}\text{C}$  NMR ( $\text{CDCl}_3$ , 101 MHz):  $\delta$  = 170.8, 169.4, 132.4, 131.4, 95.8, 69.5, 69.5, 53.3, 24.0, 24.0, 20.6, 12.7 ppm.  $m/z$  = 192. HPLC analysis: Daicel Chiralpak AS-H, hexane/*i*-PrOH = 98/2, flow rate = 1.0 mL/min,  $\lambda$  = 254 nm, retention time;  $t_R(\text{major})$  = 15.4 min,  $t_R(\text{minor})$  = 22.6 min.

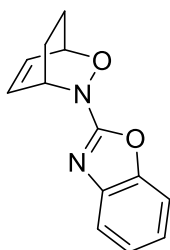

**3ao**: According to GP 5. 22 mg, 96%. Racemic.

$^1\text{H}$  NMR ( $\text{CDCl}_3$ , 400MHz):  $\delta$  = 7.42 - 7.59 (m, 1 H), 7.31 - 7.42 (m, 1 H), 7.06 - 7.30 (m, 2 H), 6.52 - 6.70 (m, 2 H), 4.92 - 5.12 (m, 1 H), 4.75 - 4.92 (m, 1 H), 2.16 - 2.46 (m, 2 H), 1.53 - 1.73 (m, 1 H), 1.36 - 1.53 (m, 1 H) ppm.  $^{13}\text{C}$  NMR ( $\text{CDCl}_3$ , 101 MHz):  $\delta$  = 164.3, 149.4, 141.7, 132.2, 132.1, 132.0, 124.3, 122.6, 118.2, 109.7, 70.9, 52.9, 23.6, 20.2 ppm.  $m/z$  = 228. HPLC analysis: Daicel Chiralpak AD-H, hexane/*i*-PrOH = 98/2, flow rate = 1.0 mL/min,  $\lambda$  = 254 nm, retention time;  $t_R$  = 25.8 min,  $t_R$  = 28.9 min.

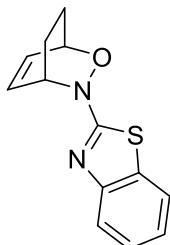

**3ap**: According to GP 5. 21 mg, 86%. Racemic.

$^1\text{H}$  NMR ( $\text{CDCl}_3$ , 400MHz):  $\delta$  = 7.48 - 7.62 (m, 1 H), 7.10 - 7.25 (m, 3 H), 6.77 - 6.81 (m, 1 H), 6.14 - 6.18 (m, 1 H), 4.65 - 4.77 (m, 1 H), 4.02 - 4.13 (m, 1 H), 2.14 - 2.41 (m, 2 H), 1.48 - 1.61 (m, 1 H), 1.37 - 1.47 (m, 1 H) ppm.  $^{13}\text{C}$  NMR ( $\text{CDCl}_3$ , 101 MHz):  $\delta$  = 147.8, 133.6, 129.1, 128.2, 127.0, 126.9, 123.3, 119.7, 111.1, 69.8, 55.9, 23.3, 22.1 ppm.  $m/z$  = 244. HPLC analysis: Daicel Chiralpak AD-H, hexane/*i*-PrOH = 99/1, flow rate = 1.0 mL/min,  $\lambda$  = 254 nm, retention time;  $t_R$  = 13.9 min,  $t_R$  = 16.7 min.

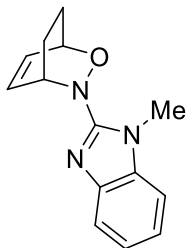

**3aq**: According to GP 5. 23 mg, 95%. Racemic.

$^1\text{H}$  NMR ( $\text{CDCl}_3$ , 400MHz):  $\delta$  = 7.52 - 7.62 (m, 1 H), 7.12 - 7.21 (m, 3 H), 6.86 (dd,  $J$ =7.6, 6.4 Hz, 1 H), 6.47 - 6.55 (m, 1 H), 4.86 - 4.97 (m, 1 H), 4.54 - 4.68 (m, 1 H), 3.72 (s, 3 H), 2.18 - 2.35 (m, 2 H), 1.56 - 1.70 (m, 1 H), 1.39 - 1.54 (m, 1 H) ppm.  $^{13}\text{C}$  NMR ( $\text{CDCl}_3$ , 101 MHz):  $\delta$  = 156.9, 141.0, 136.0, 134.6, 130.9, 121.7, 121.5, 118.6, 108.5, 70.0, 51.8, 31.1, 24.2, 20.9 ppm.  $m/z$  = 241. HPLC analysis: Daicel Chiralpak AD-H, hexane/*i*-PrOH = 98/2, flow rate = 1.0 mL/min,  $\lambda$  = 254 nm, retention time;  $t_R$  = 18.1 min,  $t_R$  = 19.7 min.

## 11. Competition experiment.

Cu(CH<sub>3</sub>CN)<sub>4</sub>BF<sub>4</sub> (3.1 mg, 0.010 mmol) and (S)-DTBM-Segphos (13.0 mg, 0.011 mmol) were taken in an oven dried 16 × 150 mm test tube equipped with a magnetic stir bar and a rubber septum. The test tube was evacuated and carefully purged with nitrogen. THF (1 mL) was added to it and the mixture was stirred for 1 h. After that the catalyst solution was placed on a −85 °C bath. Nitroso compounds **1b,c,j** (0.1 mmol each) was added (as mixture at one time) and the wall of the test tube was rinsed with THF (1 mL). The mixture was further stirred for 10 min before the dienes **2a** (10 μL, 0.1 mmol) was added. Then the reaction mixture was warmed to −40 °C over ~2 h and stirred at −40 °C overnight. The mixture was then allowed to warm to 0 °C before water was added. The organic mixture was extracted in EtOAc, dried over Na<sub>2</sub>SO<sub>4</sub>, evaporated and the ratio of the product was determined by <sup>1</sup>H NMR.

Ratio of **3ab:3ac:3aj** = 17:17:66

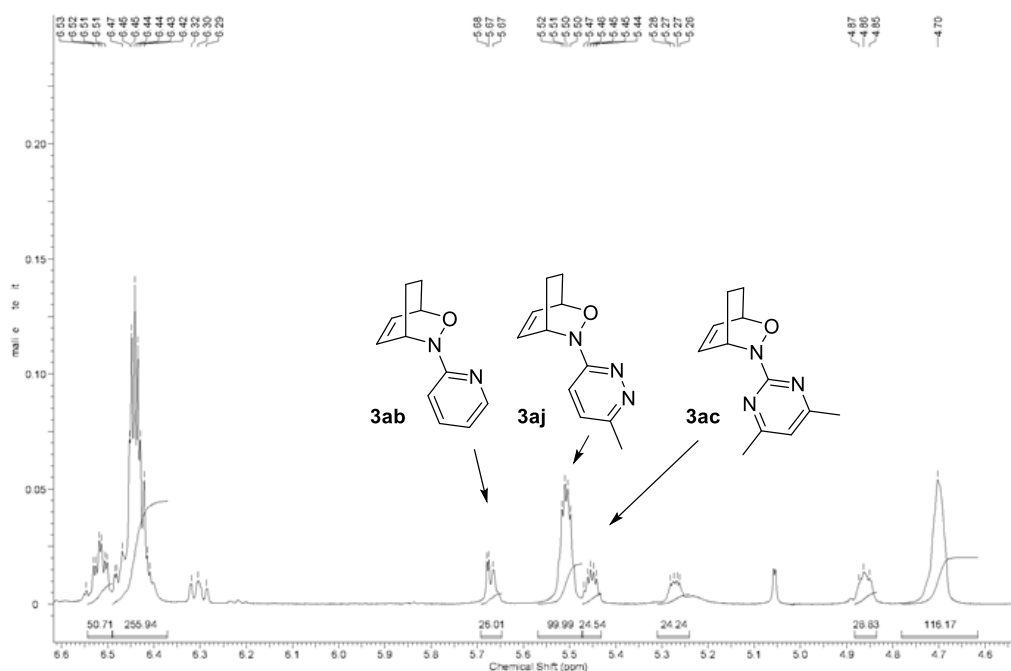

## 12. Synthesis of nitroso compounds.

The nitroso compounds **1c–n** were prepared by the oxidation of the corresponding aryl hydroxyl amines following the modified literature procedure by Moskalenko and coworkers.<sup>S1a</sup> *Synthesis of aryl hydroxyl amines.*<sup>S1b</sup> Aryl chloride (10 mmol) and  $\text{NH}_2\text{OH}\cdot\text{HCl}$  (2.38 g, 40 mmol) was taken in a two necked round bottom flask equipped with a reflux condenser. It was then added EtOH (20 mL) and  $\text{NEt}_3$  (5.62 mL, 40 mmol) and the mixture was refluxed at 90 °C. The reaction was monitored by TLC. After complete consumption, ethanol was evaporated and water (5 mL) was added. The organics were extracted in EtOAc, dried over  $\text{Na}_2\text{SO}_4$ , concentrated and purified by column chromatography.

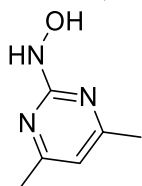

1.00 g, 72%.  $^1\text{H}$  NMR ( $\text{DMSO-d}_6$ , 400MHz):  $\delta$  = 9.16 (s, 1 H), 8.57 (s, 1 H), 6.49 (s, 1 H), 2.23 (s, 6 H) ppm.  $^{13}\text{C}$  NMR ( $\text{DMSO-d}_6$ , 101MHz):  $\delta$  = 166.8, 165.6, 110.9, 23.4 ppm.  $m/z$  = 139.<sup>S1b</sup>

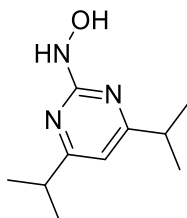

1.56 g, 80%.  $^1\text{H}$  NMR ( $\text{CDCl}_3$ , 400MHz):  $\delta$  = 9.80 (br. s., 1 H), 7.55 (br. s., 1 H), 6.53 (s, 1 H), 2.93 (spt,  $J$ =6.9 Hz, 2 H), 1.26 (d,  $J$ =6.9 Hz, 12 H) ppm.  $^{13}\text{C}$  NMR ( $\text{CDCl}_3$ , 101 MHz):  $\delta$  = 177.3, 165.9, 107.0, 35.9, 21.9 ppm.  $m/z$  = 195.

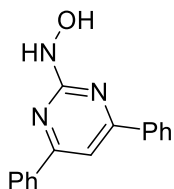

2.02 g, 77%.  $^1\text{H}$  NMR ( $\text{CDCl}_3$ , 400MHz):  $\delta$  = 8.03 - 8.17 (m, 4 H), 7.62 - 7.67 (m, 1 H), 7.45 - 7.60 (m, 7 H), 6.92 - 7.15 (m, 1 H) ppm.  $m/z$  = 263.<sup>S1b</sup>

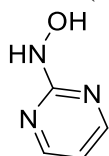

0.50 g, 45%.  $^1\text{H}$  NMR ( $\text{DMSO-d}_6$ , 400MHz):  $\delta$  = 9.38 (s, 1 H), 8.61 (s, 1 H), 8.36 (d,  $J$ =4.6 Hz, 2 H), 6.71 ppm (t,  $J$ =4.7 Hz, 1 H).  $^{13}\text{C}$  NMR ( $\text{DMSO-d}_6$ , 101MHz):  $\delta$  = 165.6, 157.8, 112.1 ppm.  $m/z$  = 111.<sup>S1b</sup>

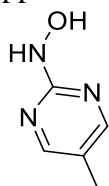

0.81 g, 65%.  $^1\text{H}$  NMR (DMSO- $d_6$ , 400MHz):  $\delta$  = 9.10 (s, 1 H), 8.51 (s, 1 H), 8.16 - 8.28 (m, 2 H), 2.10 (s, 3 H) ppm.  $^{13}\text{C}$  NMR (DMSO- $d_6$ , 101MHz):  $\delta$  = 164.5, 157.5, 120.6, 14.2 ppm.  $m/z$  = 125.

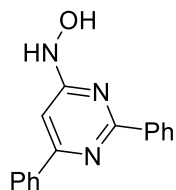

1.92 g, 73%.  $^1\text{H}$  NMR (DMSO- $d_6$ , 400MHz):  $\delta$  = 10.01 (s, 1 H), 9.20 (s, 1 H), 8.34 - 8.53 (m, 2 H), 8.22 (dd,  $J$ =7.6, 1.8 Hz, 2 H), 7.41 - 7.65 (m, 6 H), 7.16 (s, 1 H) ppm.  $^{13}\text{C}$  NMR (DMSO- $d_6$ , 101MHz):  $\delta$  = 167.8, 162.5, 162.4, 137.9, 137.4, 130.4, 130.4, 128.9, 128.4, 127.8, 126.7, 95.4, 40.1, 39.9, 39.7, 39.3, 39.1, 38.9 ppm.  $m/z$  = 263. <sup>S1b</sup>

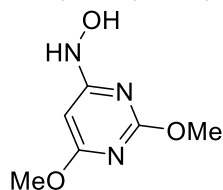

1.12 g, 66%.  $^1\text{H}$  NMR (DMSO- $d_6$ , 400MHz):  $\delta$  = 9.51 (s, 1 H), 8.88 (s, 1 H), 5.66 (s, 1 H), 3.79 (s, 3 H), 3.76 (s, 3 H) ppm.  $^{13}\text{C}$  NMR (DMSO- $d_6$ , 101MHz):  $\delta$  = 171.7, 169.7, 164.2, 78.2, 53.9, 53.3 ppm.  $m/z$  = 171.

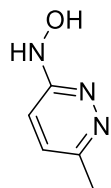

0.96 g, 77%.  $^1\text{H}$  NMR ( $\text{CDCl}_3$ , 400MHz):  $\delta$  = 7.15 (d,  $J$ =9.6 Hz, 1 H), 6.91 (d,  $J$ =9.6 Hz, 1 H), 2.33 (s, 3 H) ppm.  $^{13}\text{C}$  NMR ( $\text{CDCl}_3$ , 101 MHz):  $\delta$  = 161.2, 145.5, 134.9, 130.2, 20.7 ppm.  $m/z$  = 125.

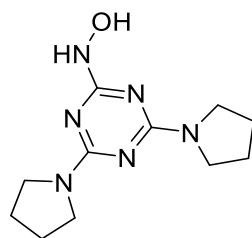

1.65 g, 66%.  $^1\text{H}$  NMR (DMSO- $d_6$ , 400MHz):  $\delta$  = 8.91 (s, 1 H), 8.24 (br. s., 1 H), 3.41 (br. s., 8 H), 1.83 ppm (t,  $J$ =6.6 Hz, 8 H) ppm.  $^{13}\text{C}$  NMR (DMSO- $d_6$ , 101MHz):  $\delta$  = 169.0, 163.0, 45.6, 24.7 ppm.  $m/z$  = 250.

*Synthesis of nitroso compounds.*<sup>S1a</sup> To a round bottom flash charged with  $\text{MnO}_2$  (3.5 g) was added dry  $\text{CH}_2\text{Cl}_2$  (50 mL) and the black suspension was stirred for 20 min at room temperature before 0.5 mL MeOH was added. It was then cooled to  $-10^\circ\text{C}$  and corresponding hydroxyl amine (2 mmol) was added in two equal portion (as solid). The mixture was then stirred at  $-10^\circ\text{C}$  for 30 min and then at r.t. for 30 min. It was then filtered over a small pad of celite and thoroughly washed with  $\text{CH}_2\text{Cl}_2$ . Then the solution was evaporated on a rotary evaporator (bath temperature  $<20^\circ\text{C}$ ). Then the solid residue was washed with dry ether (3 mL) to obtain the nitroso compounds **1c–n**.

**1b,n,o,q** were prepared similar to method described by Rampal<sup>S1c</sup> and Miller.<sup>S1d</sup> **1p** was prepared according to the report by Almeida.<sup>S1e</sup>

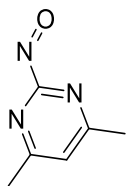

**1c.** 260 mg, 95%. Mixture of monomer and dimer (1:10 ratio).

$^1\text{H}$  NMR ( $\text{CDCl}_3$ , 400MHz):  $\delta$  = 7.35 (s, 1 H)\*, 7.05 (s, 1 H), 2.69 (s, 6 H)\*, 2.39 (s, 6 H) ppm.

\* = minor.  $^{13}\text{C}$  NMR ( $\text{CDCl}_3$ , 101 MHz):  $\delta$  = 169.6, 159.8, 121.1, 23.8 ppm.  $m/z$  = 137. IR (ATR): 1602.3, 1525.3, 1430.6, 1396.0, 1372.2, 1290.5, 819.1. <sup>S1a</sup>

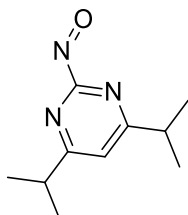

**1d.** 378 mg, 98%.  $^1\text{H}$  NMR ( $\text{CDCl}_3$ , 400MHz):  $\delta$  = 6.98 (s, 1 H), 2.91 (spt,  $J$ =6.8 Hz, 2 H), 1.08 (d,  $J$ =6.9 Hz, 12 H) ppm.  $^{13}\text{C}$  NMR ( $\text{CDCl}_3$ , 101 MHz):  $\delta$  = 178.8, 160.2, 116.4, 35.8, 21.6 ppm.  $m/z$  = 193. IR (ATR): 1595.6, 1523.2, 1471.7, 1399.3, 1390.4, 1372.8, 1328.5, 1296.6, 1282.1, 793.7.

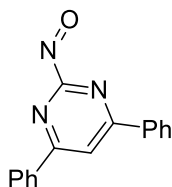

**1e.** 511 mg, 98%.  $^1\text{H}$  NMR ( $\text{CDCl}_3$ , 400MHz):  $\delta$  = 8.62 (s, 1 H), 8.16 (d,  $J$ =7.6 Hz, 4 H), 7.56 (t,  $J$ =7.3 Hz, 2 H), 7.42 (t,  $J$ =7.7 Hz, 4 H) ppm.  $^{13}\text{C}$  NMR ( $\text{CDCl}_3$ , 101 MHz):  $\delta$  = 166.7, 160.1, 134.1, 132.5, 129.1, 127.6, 113.5 ppm.  $m/z$  = 261. IR (ATR): 1591.5, 1576.7, 1510.0, 1439.1, 1397.7, 1366.1, 1323.8, 1306.1, 1267.2, 1239.4, 786.1, 687.0. <sup>S1a</sup>

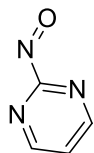

**1f.** 209 mg, 96%. Mixture of monomer and dimer (1:3 ratio)

$^1\text{H}$  NMR ( $\text{CDCl}_3$ , 400MHz):  $\delta$  = d = 9.10 (d,  $J$ =4.6 Hz, 2 H)\*, 8.70 (d,  $J$ =4.8 Hz, 2 H), 7.65 (t,  $J$ =4.8 Hz, 1 H)\*, 7.41 (t,  $J$ =4.8 Hz, 1 H) ppm. \* = minor.  $^{13}\text{C}$  NMR ( $\text{CDCl}_3$ , 101 MHz):  $\delta$  = 159.4, 159.2, 122.6 ppm.  $m/z$  = 109. IR (ATR): 1576.3, 1444.3, 1377.3, 1238.5, 998.4, 978.1, 785.4, 717.3. <sup>S1a</sup>

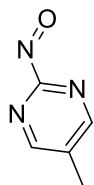

**1g.** 229 mg, 93%. Mixture of monomer and dimer (1:6 ratio)

$^1\text{H}$  NMR ( $\text{CDCl}_3$ , 400MHz):  $\delta$  = 8.86 (s, 2 H) \*, 8.47 (s, 2 H), 2.48 (s, 3 H) \*, 2.37 (s, 3 H) ppm. \* = minor.  $^{13}\text{C}$  NMR ( $\text{CDCl}_3$ , 101 MHz):  $\delta$  = 158.9, 158.5, 132.9, 15.6 ppm.  $m/z$  = 123. IR (ATR): 1572.5, 1395.2, 1290.4, 1253.1, 982.2, 787.5, 775.8, 651.0.



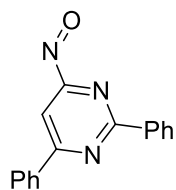

**1h.** 506 mg, 97%.  $^1\text{H}$  NMR ( $\text{CDCl}_3$ , 400MHz):  $\delta$  = 8.30 (dd,  $J$ =7.7, 1.9 Hz, 2 H), 8.21 (s, 1 H), 7.99 (d,  $J$ =7.3 Hz, 2 H), 7.54 - 7.68 (m, 3 H), 7.34 (t,  $J$ =7.4 Hz, 1 H), 7.19 (t,  $J$ =7.8 Hz, 2 H) ppm.  $^{13}\text{C}$  NMR ( $\text{CDCl}_3$ , 101 MHz):  $\delta$  = 168.6, 163.9, 163.4, 135.8, 135.6, 132.4, 131.9, 129.4, 128.7, 128.4, 127.8, 106.8 ppm.  $m/z$  = 261. IR (ATR): 1589.0, 1571.1, 1532.2, 1493.6, 1413.2, 1369.0, 1339.4, 1287.8, 1177.4, 776.6, 759.3, 690.4. <sup>S1a</sup>

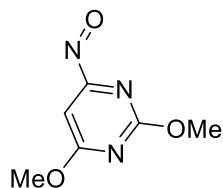

**1i.** 318 mg, 94%. Mixture of monomer and dimer (1:3 ratio)  
 $^1\text{H}$  NMR ( $\text{CDCl}_3$ , 400MHz):  $\delta$  = 6.85 (s, 1 H), 6.79 (s., 1 H)\*, 4.10 (s., 6 H)\*, 4.03 (s, 3 H), 3.63 (s, 3 H) ppm. \* = minor.  $^{13}\text{C}$  NMR ( $\text{CDCl}_3$ , 101 MHz):  $\delta$  = 173.5, 164.0, 163.3, 95.1, 55.5, 55.3 ppm.  $m/z$  = 169. IR (ATR): 1609.6, 1567.5, 1490.0, 1470.0, 1411.0, 1357.5, 1206.7, 1100.5, 1055.3, 831.8.

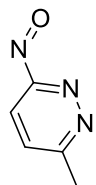

**1j.** 234 mg, 95%.  $^1\text{H}$  NMR ( $\text{CDCl}_3$ , 400MHz):  $\delta$  = 7.99 (d,  $J$ =8.9 Hz, 1 H), 7.61 (d,  $J$ =8.9 Hz, 1 H), 7.13 (d,  $J$ =9.7 Hz, 1 H)\*, 6.87 (d,  $J$ =9.6 Hz, 1 H)\*, 2.68 (s, 3 H), 2.30 (s, 3 H)\* ppm. \* = minor.  $^{13}\text{C}$  NMR ( $\text{CDCl}_3$ , 101 MHz):  $\delta$  = 20.6,\* 22.2, 123.6, 129.3, 130.1\*, 130.6, 134.8\*, 158.5, 161.2\*, 162.8, 165.2\* ppm. \* = minor.  $m/z$  = 123. IR (ATR): 1654.5, 1550.5, 1395.8, 1247.2, 1097.9, 947.7, 834.2, 807.6.

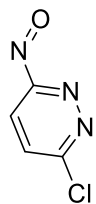

**1k.** 260 mg, 91%.  $^1\text{H}$  NMR ( $\text{CDCl}_3$ , 400MHz):  $\delta$  = 8.11 (d,  $J$ =7.8 Hz, 6 H), 7.84 (d,  $J$ =8.1 Hz, 6 H), 7.74 (d,  $J$ =9.2 Hz, 8 H), 6.63 (d,  $J$ =8.5 Hz, 7 H) ppm.  $m/z$  = 143. IR (ATR): 1651.1, 1551.8, 1410.6, 1384.5, 1245.9, 1137.8, 1082.3, 946.2, 862.4, 843.7, 764.1.

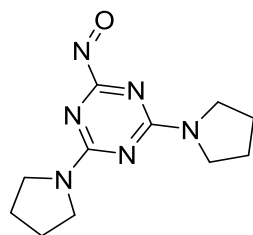

**1m.** 468 mg, 94%.  $^1\text{H}$  NMR ( $\text{CDCl}_3$ , 400MHz):  $\delta$  = 3.34 - 3.61 (m, 8 H), 1.75 - 2.05 (m, 8 H) ppm.  $^{13}\text{C}$  NMR ( $\text{CDCl}_3$ , 101 MHz):  $\delta$  = 166.6, 163.1, 46.5, 46.4, 25.3, 25.2 ppm.  $m/z$  = 249. IR (ATR): 2970.6, 2873.9, 1591.1, 1514.7, 1478.3, 1457.5, 1345.0, 727.9.

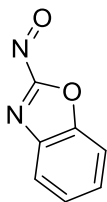

**1o.** 298 mg, 20% (10 mmol scale).  $^1\text{H}$  NMR ( $\text{CDCl}_3$ , 400MHz):  $\delta$  = 8.12 - 8.27 (m, 1 H), 7.66 - 7.77 (m, 1 H), 7.51 - 7.65 (m, 2 H) ppm.  $^{13}\text{C}$  NMR ( $\text{CDCl}_3$ , 101 MHz):  $\delta$  = 168.1, 146.6, 140.6, 132.5, 127.5, 125.3, 112.9, 77.5, 76.8 ppm.  $m/z$  = 149. IR (ATR): 1452.0, 1431.5, 1419.6, 1274.2, 1218.3, 1117.3, 1100.4, 943.0, 832.6, 765.3, 751.2.

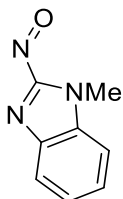

**1q.** 354 mg, 22% (10 mmol scale).  $^1\text{H}$  NMR ( $\text{CDCl}_3$ , 400MHz):  $\delta$  = 8.01 (d,  $J$ =8.5 Hz, 1 H), 7.58 - 7.71 (m, 2 H), 7.48 (ddd,  $J$ =8.4, 5.3, 3.1 Hz, 1 H), 4.62 (s, 3 H) ppm.  $^{13}\text{C}$  NMR ( $\text{CDCl}_3$ , 101 MHz):  $\delta$  = 165.3, 140.5, 134.1, 129.2, 126.8, 125.7, 111.8, 31.2 ppm.  $m/z$  = 161. IR (ATR): 1572.0, 1509.2, 1410.4, 1269.1, 1238.0, 1161.4, 1117.0, 1079.5, 884.4, 856.5, 777.5, 745.5.

### 13. Synthesis of the dienes 2q-u.

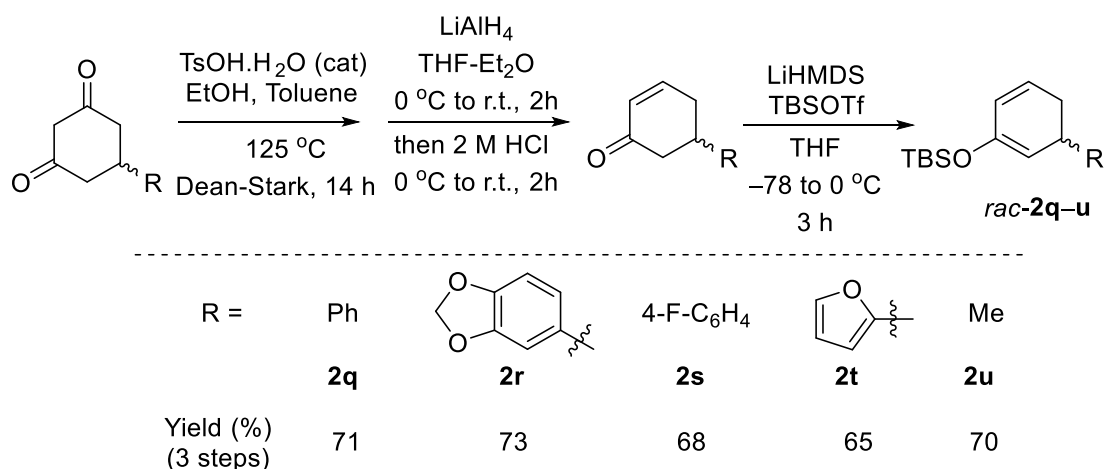

#### General procedure 6:

To a two-necked round bottom flask equipped with Dean-Stark apparatus and a magnetic stir bar was charged with the 5-substituted cyclohexane-1,3-dione (5 mmol), TsOH.H<sub>2</sub>O (19 mg, 0.1 mmol), EtOH (2.5 mL) and toluene (10 mL) and the mixture was heated to 125 °C for 14 h. After cooling down to room temperature 1 mL NaOH solution (2 M in H<sub>2</sub>O) was added and the organic phase was separated. The aqueous layer was extracted with EtOAc. Combined layer were washed with brine solution and then dried over Na<sub>2</sub>SO<sub>4</sub>, filtered, concentrated and the residue was used for next step without purification.

The residue was dissolved in THF (10 mL) and was added drop wise to a stirred suspension of LiAlH<sub>4</sub> (190 mg, 5 mmol) in Et<sub>2</sub>O (10 mL) at 0 °C. After 20 min the ice bath was removed and the mixture was allowed to stir at r.t. for another 2 h. It was cooled to 0 °C again and 12 mL aq. HCl (2 M) was carefully added. Then the ice bath was removed and the mixture was stirred for another 1 h. The organic layer was then separated and the aq. layer was extracted with ether. Combined layer was washed with saturated NaHCO<sub>3</sub> solution, dried over Na<sub>2</sub>SO<sub>4</sub>, concentrated,

and purified by column chromatography using EtOAc/*n*-hexane (1/4) as eluent to yield 5-substituted cyclohex-2-en-1-ones.

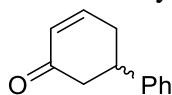

According to GP 6 on 10 mmol scale. 1.25 g, 79%.  
NMR spectra in accord with the literature.<sup>S2</sup>

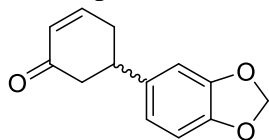

According to GP 6 on 10 mmol scale. 1.65 g, 76%.  
NMR spectra in accord with the literature.<sup>S3</sup>

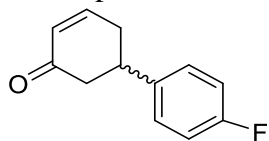

According to GP 6. 815 mg, 86%.  
NMR spectra in accord with the literature.<sup>S4</sup>

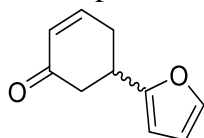

According to GP 6. 649 mg, 80%.  
<sup>1</sup>H NMR (CDCl<sub>3</sub>, 400MHz): δ = 7.34 (dd, *J*=1.8, 0.9 Hz, 1 H), 7.00 (ddd, *J*=10.1, 5.3, 3.0 Hz, 1 H), 6.30 (dd, *J*=3.2, 1.8 Hz, 1 H), 5.99 - 6.17 (m, 2 H), 3.33 - 3.55 (m, 1 H), 2.69 - 2.83 (m, 2 H), 2.53 - 2.68 (m, 2 H) ppm. <sup>13</sup>C NMR (CDCl<sub>3</sub>, 101 MHz): δ = 198.3, 156.4, 148.7, 141.7, 130.0, 110.3, 104.8, 42.4, 34.3, 30.8 ppm. *m/z* = 162.

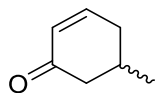

According to GP 6. 402 mg, 73%.  
NMR spectra in accord with the literature.<sup>S5</sup>

### General procedure 7:

LiHMDS (3 mL, 1 M in THF) was added dropwise to a THF solution (3 mL) of 5-substituted cyclohex-2-en-1-one (2 mmol) at -78 °C and the mixture was stirred at that temperature for another 1 h before TBSOTf (0.69 mL, 794 mg, 3 mmol) was added. The mixture was slowly warm to 0 °C for 3 h and quenched with 3 mL saturated NaHCO<sub>3</sub> solution. The organic layer was extracted with ether, dried over Na<sub>2</sub>SO<sub>4</sub>, concentrated, and purified by column chromatography using Et<sub>2</sub>O/NEt<sub>3</sub>/*n*-pentane (1/2/50) as eluent to yield the dienes **2q-u**.

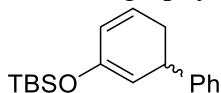

**2q**, According to GP 7. 516 mg, 90%.

<sup>1</sup>H NMR (CDCl<sub>3</sub>, 400MHz): δ = 7.27 - 7.34 (m, 4 H), 7.18 - 7.25 (m, 1 H), 5.75 - 5.87 (m, 2 H), 4.89 - 4.99 (m, 1 H), 3.67 - 3.71 (m, 1 H), 2.40 - 2.54 (m, 1 H), 2.17 - 2.31 (m, 1 H), 0.95 (s, 9 H), 0.18 - 0.17 (2 s, 6 H) ppm. <sup>13</sup>C NMR (CDCl<sub>3</sub>, 101 MHz): δ = 128.5, 127.7, 127.7, 126.5, 126.4, 106.8, 40.3, 32.5, 25.9, -4.3 ppm. *m/z* = 286.

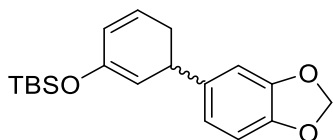

**2r**, According to GP 7. 635 mg, 96%.

$^1\text{H}$  NMR ( $\text{CDCl}_3$ , 400MHz):  $\delta$  = 6.83 (s, 1 H), 6.74 (s, 2 H), 5.93 (q,  $J$ =1.4 Hz, 2 H), 5.72 - 5.87 (m, 2 H), 4.81 - 4.94 (m, 1 H), 3.59 - 3.65 (m, 1 H), 2.38 - 2.51 (m, 1 H), 2.17 - 2.28 (m, 1 H), 0.96 (s, 10 H), 0.18 (2 s, 7 H) ppm.  $^{13}\text{C}$  NMR ( $\text{CDCl}_3$ , 101 MHz):  $\delta$  = 149.1, 147.6, 146.0, 140.3, 127.7, 126.4, 120.4, 108.2, 106.9, 100.9, 39.9, 32.7, 25.8, 18.2, -4.3 ppm.  $m/z$  = 330.

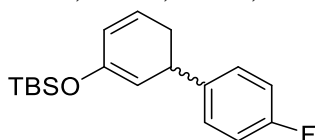

**2s**, According to GP 7. 482 mg, 79%.

$^1\text{H}$  NMR ( $\text{CDCl}_3$ , 400MHz):  $\delta$  = 7.46 - 7.60 (m, 2 H), 7.17 - 7.34 (m, 2 H), 5.90 - 6.19 (m, 2 H), 5.20 (d,  $J$ =4.1 Hz, 1 H), 3.92 - 4.04 (m, 1 H), 2.68 - 2.86 (m, 1 H), 2.44 - 2.59 (m, 1 H), 1.24 (s, 9 H), 0.46 (2 s, 6 H) ppm.  $^{13}\text{C}$  NMR ( $\text{CDCl}_3$ , 101 MHz):  $\delta$  = 161.6 (d,  $J$ =244.4 Hz), 149.3, 141.8 (d,  $J$ =2.0 Hz), 129.0 (d,  $J$ =9.1 Hz), 127.6, 126.5, 115.2 (d,  $J$ =21.2 Hz), 106.6, 39.4, 32.5, 26.1, 25.8, 18.3, -4.3 ppm.  $^{19}\text{F}$  NMR ( $\text{CDCl}_3$ , 376 MHz):  $\delta$  = -117.1 ppm.  $m/z$  = 304.

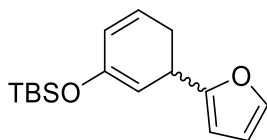

**2t**, According to GP 7. 448 mg, 81%.

$^1\text{H}$  NMR ( $\text{CDCl}_3$ , 400MHz):  $\delta$  = 7.30 - 7.37 (m, 1 H), 6.26 - 6.36 (m, 1 H), 6.00 - 6.12 (m, 1 H), 5.81 - 5.94 (m, 1 H), 5.72 - 5.81 (m, 1 H), 5.00 (dd,  $J$ =4.1, 2.1 Hz, 1 H), 3.68 - 3.83 (m, 1 H), 2.31 - 2.58 (m, 2 H), 0.97 (s, 10 H), 0.19 (2 s, 6 H) ppm.  $^{13}\text{C}$  NMR ( $\text{CDCl}_3$ , 101 MHz):  $\delta$  = 158.3, 149.4, 141.2, 127.8, 126.4, 110.1, 104.5, 103.4, 33.1, 28.5, 25.8, 18.2, -4.3 ppm.  $m/z$  = 276.

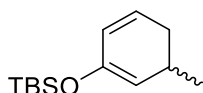

**2u**, According to GP 7. 431 mg, 96%.

$^1\text{H}$  NMR ( $\text{CDCl}_3$ , 400MHz):  $\delta$  = 5.75 - 5.86 (m, 1 H), 5.63 - 5.72 (m, 1 H), 4.77 (dd,  $J$ =3.8, 1.9 Hz, 1 H), 2.40 - 2.56 (m, 1 H), 2.18 - 2.21 (m, 1 H), 1.77 - 1.92 (m, 1 H), 1.00 (d,  $J$ =6.9 Hz, 3 H), 0.93 (s, 9 H), 0.14 (s, 6 H) ppm.  $^{13}\text{C}$  NMR ( $\text{CDCl}_3$ , 101 MHz):  $\delta$  = 148.0, 128.0, 126.1, 109.7, 31.3, 28.3, 26.1, 25.9, 20.9, 18.2, -4.4 ppm.  $m/z$  = 224.

## 14. Synthesis of the dienes **2v,w**.

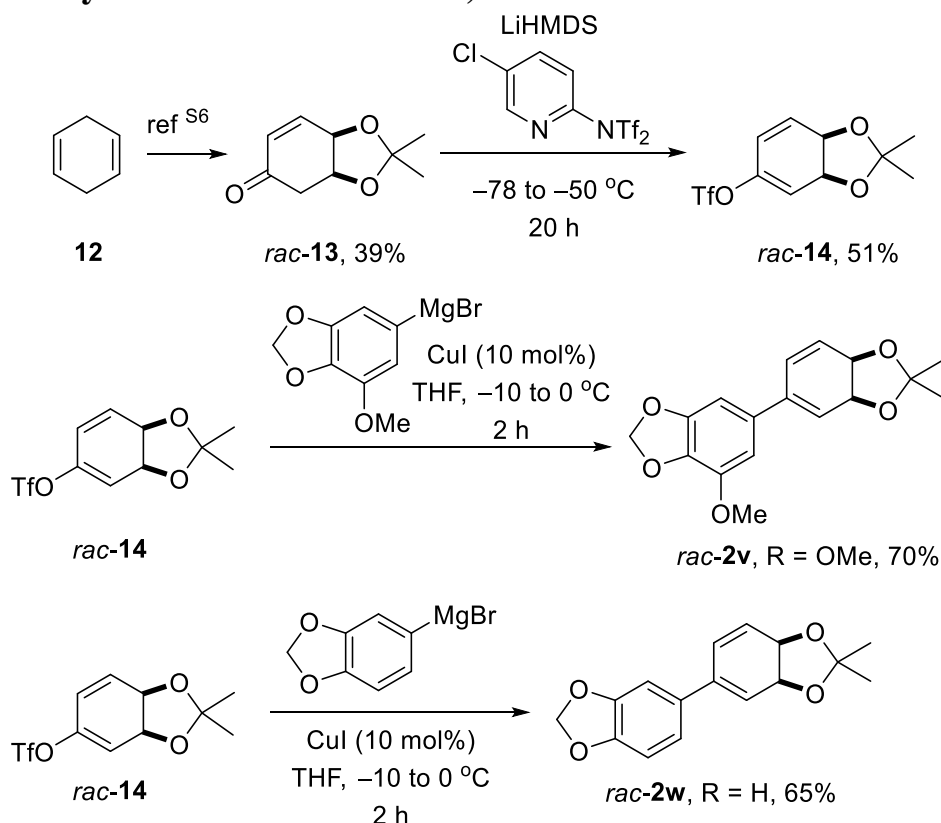

*rac*-13 was prepared in 5 steps from 1,4-cyclohexadiene according to the literature procedure.<sup>S6</sup>

**rac-14.** LiHMDS (1.5 mL, 1 M in THF) was added dropwise to a THF solution (3 mL) of *rac*-15 (168 mg, 1 mmol) at  $-78^\circ\text{C}$ . The mixture was stirred at that temperature for 75 min before Cl-PyNTf<sub>2</sub> (698 mg, 1.5 mmol) was added. The mixture was stirred at  $-78^\circ\text{C}$  for another 10 h before warm to  $-50^\circ\text{C}$  and stirred for 10 h. Then the reaction was quenched with saturated NH<sub>4</sub>Cl, extracted in CH<sub>2</sub>Cl<sub>2</sub>, dried over Na<sub>2</sub>SO<sub>4</sub>, purified by column chromatography using EtOAc/*n*-hexane (10/1) as eluent to yield *rac*-14 (153 mg, 51%).

<sup>1</sup>H NMR (CDCl<sub>3</sub>, 400MHz):  $\delta$  = 6.11 (ddd,  $J$ =10.2, 3.7, 0.9 Hz, 1 H), 5.91 - 6.00 (m, 1 H), 5.83 - 5.90 (m, 1 H), 4.89 (dd,  $J$ =8.9, 4.4 Hz, 1 H), 4.72 - 4.70 (m, 1 H), 1.41 (2 s, 6 H) ppm. <sup>13</sup>C NMR (CDCl<sub>3</sub>, 101 MHz):  $\delta$  = 145.7, 130.4, 121.3, 120.2, 118.6 (q,  $J$ =322 Hz), 106.3, 70.9, 69.7, 26.7, 24.8 ppm. <sup>19</sup>F NMR (CDCl<sub>3</sub>, 376 MHz):  $\delta$  =  $-73.3$  ppm.  $m/z$  = 300.

**rac-2v.** (7-methoxybenzo[d][1,3]dioxol-5-yl)magnesium bromide (0.75 mmol, 0.5 M in THF) was added dropwise over 20 min to a suspension of *rac*-14 (0.5 mmol) and CuI (9.5 mg, 0.05 mmol) in THF (1 mL) at  $-10^\circ\text{C}$ . The mixture was stirred for 2 h maintaining temperature below  $0^\circ\text{C}$  before quenched with saturated NH<sub>4</sub>Cl, extracted in CH<sub>2</sub>Cl<sub>2</sub>, dried over Na<sub>2</sub>SO<sub>4</sub>, purified by column chromatography using EtOAc/*n*-hexane (10/1) as eluent to yield *rac*-2v (106 mg, 70%).

<sup>1</sup>H NMR (CDCl<sub>3</sub>, 400MHz):  $\delta$  = 6.57 - 6.63 (m, 2 H), 6.28 - 6.31 (m, 1 H), 5.95 - 6.05 (m, 4 H), 4.77 - 4.82 (m, 1 H), 4.70 - 4.76 (m, 1 H), 3.91 (s, 3 H), 1.43 (2 s, 6 H) ppm. <sup>13</sup>C NMR (CDCl<sub>3</sub>, 101 MHz):  $\delta$  = 149.1, 143.6, 135.5, 135.3, 134.7, 127.0, 125.9, 120.2, 106.0, 105.3, 101.7, 100.6, 71.1, 70.5, 56.8, 26.9, 25.0 ppm.  $m/z$  = 302.

**rac-2w.** benzo[d][1,3]dioxol-5-ylmagnesium bromide (0.75 mmol, 0.5 M in THF) was added dropwise over 20 min to a suspension of *rac*-14 (0.5 mmol) and CuI (9.5 mg, 0.05 mmol) in

THF (1 mL) at  $-10\text{ }^{\circ}\text{C}$ . The mixture was stirred for 2 h maintaining temperature below  $0\text{ }^{\circ}\text{C}$  before quenched with saturated  $\text{NH}_4\text{Cl}$ , extracted in  $\text{CH}_2\text{Cl}_2$ , dried over  $\text{Na}_2\text{SO}_4$ , purified by column chromatography using EtOAc/*n*-hexane (10/1) as eluent to yield *rac*-**2w** (89 mg, 65%).  $^1\text{H}$  NMR ( $\text{CDCl}_3$ , 400MHz):  $\delta$  = 6.87 - 6.94 (m, 2 H), 6.77 - 6.83 (m, 1 H), 6.30 - 6.34 (m, 1 H), 5.92 - 6.08 (m, 4 H), 4.80 (dd,  $J=8.7, 4.1\text{ Hz}$ , 1 H), 4.70 - 4.73 (m, 1 H), 1.43 (m, 6 H) ppm.  $^{13}\text{C}$  NMR ( $\text{CDCl}_3$ , 101 MHz):  $\delta$  = 148.0, 147.6, 135.3, 134.0, 126.9, 125.9, 119.9, 119.8, 108.4, 106.7, 105.3, 101.3, 71.2, 70.5, 27.0, 25.1 ppm.  $m/z$  = 272.

## 15. References

- (S1) (a) Moskalenko, G. G.; Sedova, V. F.; Mamaev, V. P. *Chem. Heterocycl. Compd.* **1989**, 25, 805. (b) Moskalenko, G. G.; Sedova, V. F.; Mamaev, V. P. *Chem. Heterocycl. Compd.* **1986**, 22, 1232. (c) Taylor, E. C.; Tseng, C. P.; Rampal, J. B. *J. Org. Chem.* **1982**, 47, 552. (d) Li, F.; Yang, B.; Miller, M. J.; Zajicek, J.; Noll, B. C.; Möllmann, U.; Dahse, H.-M.; Miller, P. A. *Org. Lett.* **2007**, 9, 2923. (e) Faustino, H.; El-Shishtawy, R. M.; Reis, L. V. R.; Santos, P. F. S.; Almeida, P. A. *Tetrahedron Lett.* **2008**, 49, 6907.
- (S2) Kryshchal, G. V.; Kulganek, V. V.; Kucherov, V. F.; Yanovskaya, L. A. *Synthesis* **1979**, 1979, 107.
- (S3) Poe, S. L.; Morken, J. P. *Angew. Chem. Int. Ed.* **2011**, 50, 4189.
- (S4) Carlone, A.; Marigo, M.; North, C.; Landa, A.; Jorgensen, K. A. *Chem. Commun.* **2006**, 4928.
- (S5) Fleming, I.; Maiti, P.; Ramarao, C. *Org. Biomol. Chem.* **2003**, 1, 3989.
- (S6) Krow, G. R.; Carmosin, R.; Mancuso, A. *Org. Prep. Proced. Int.* **1977**, 9, 285.

## 16. Copies of $^1\text{H}$ and $^{13}\text{C}$ NMR spectra

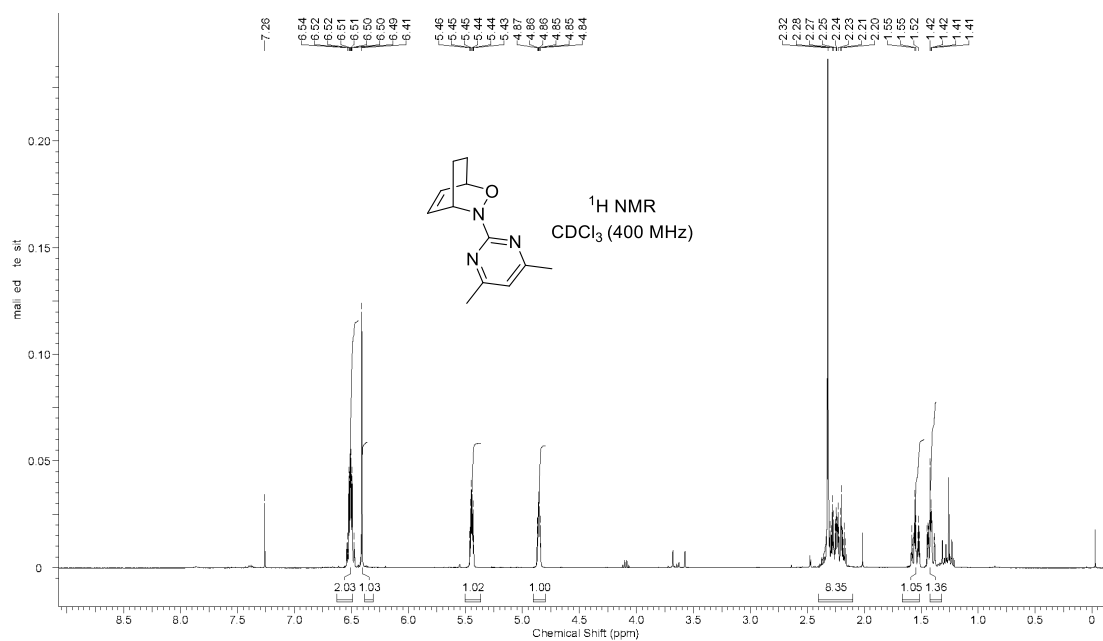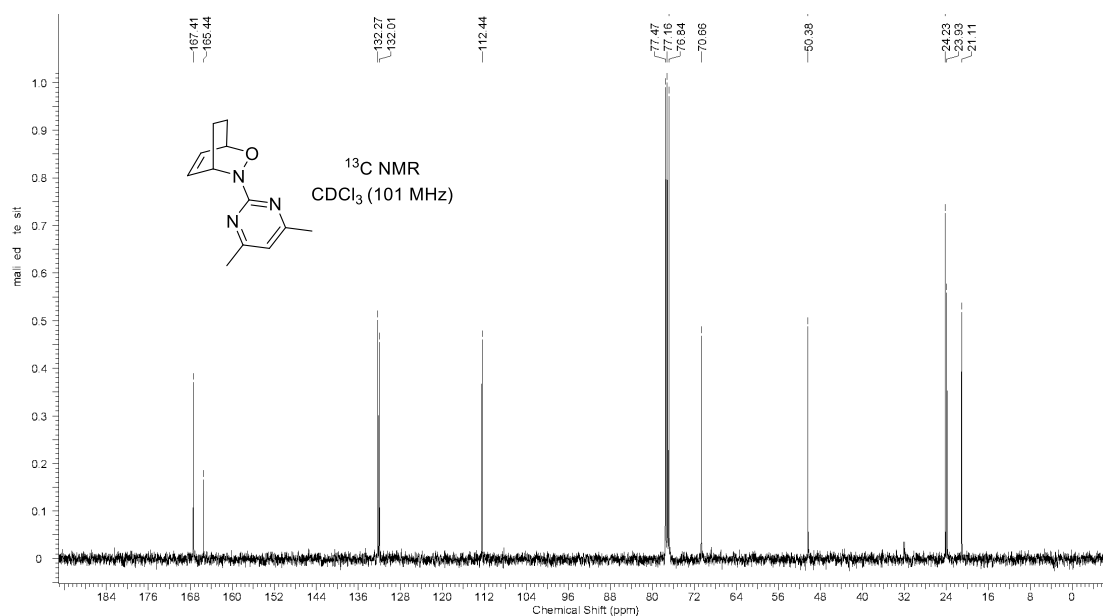

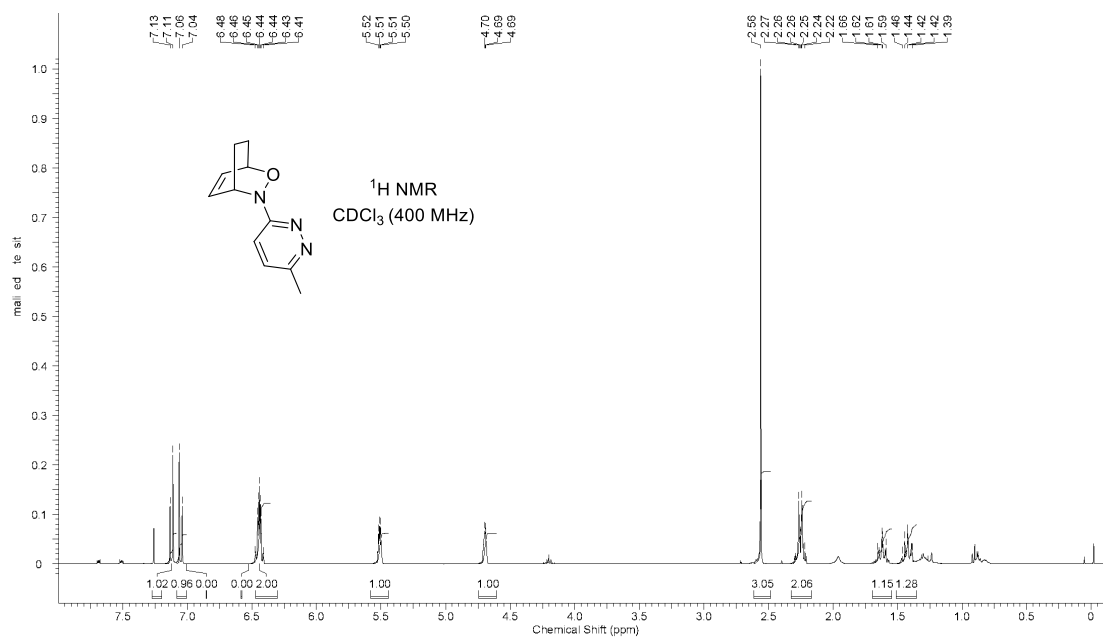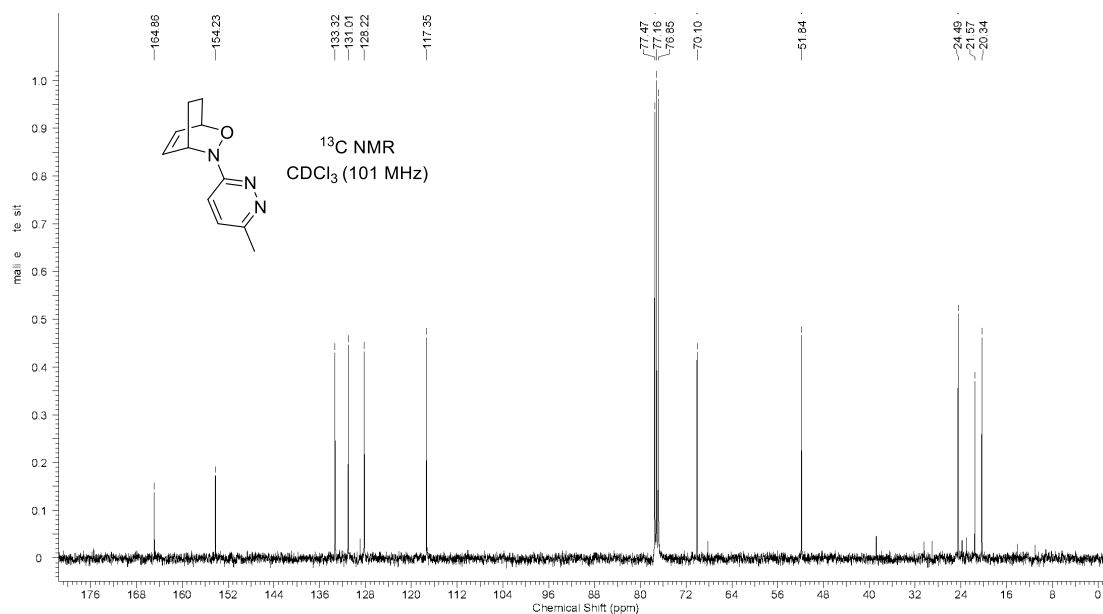



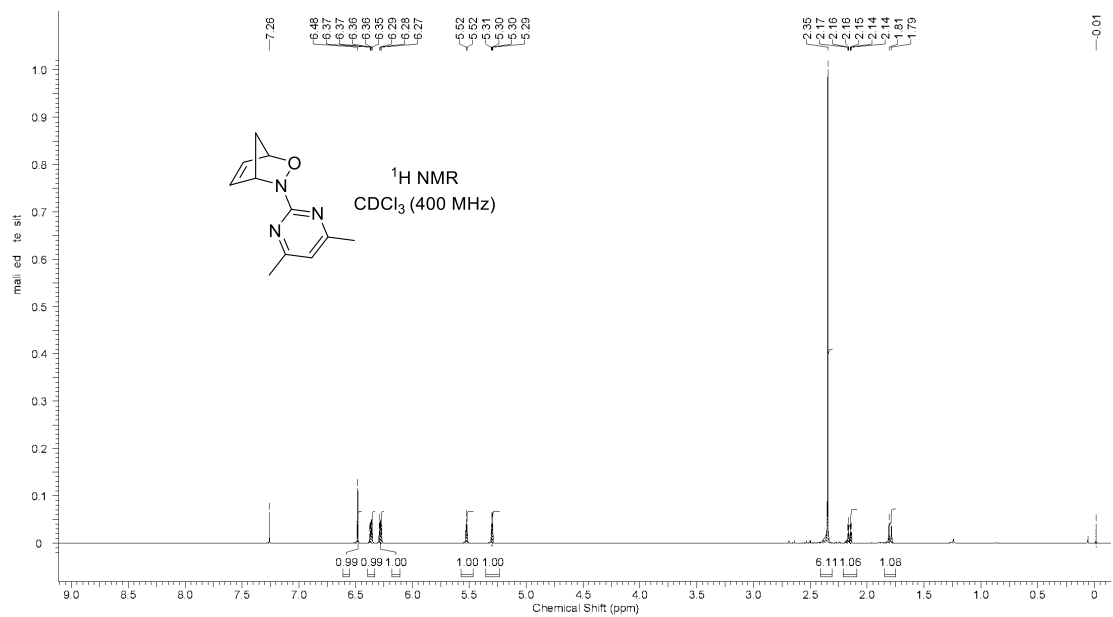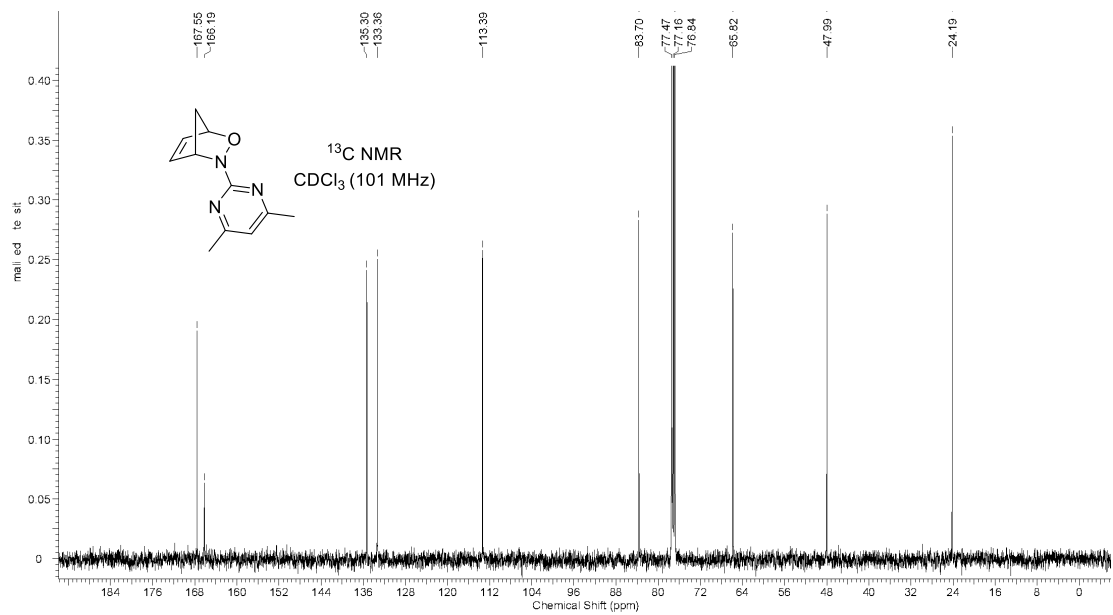

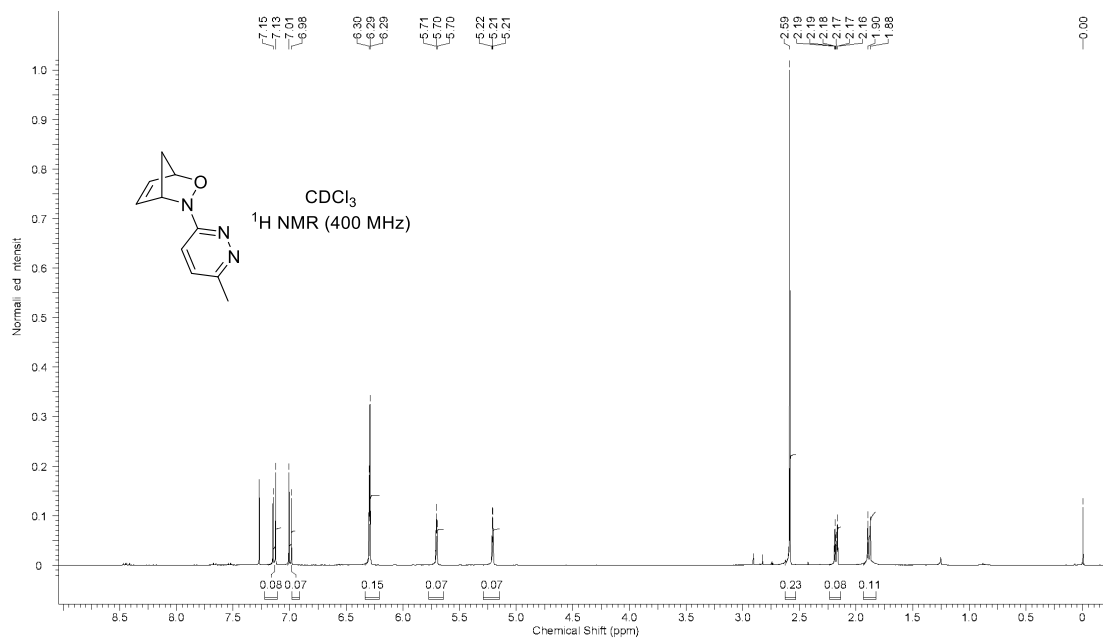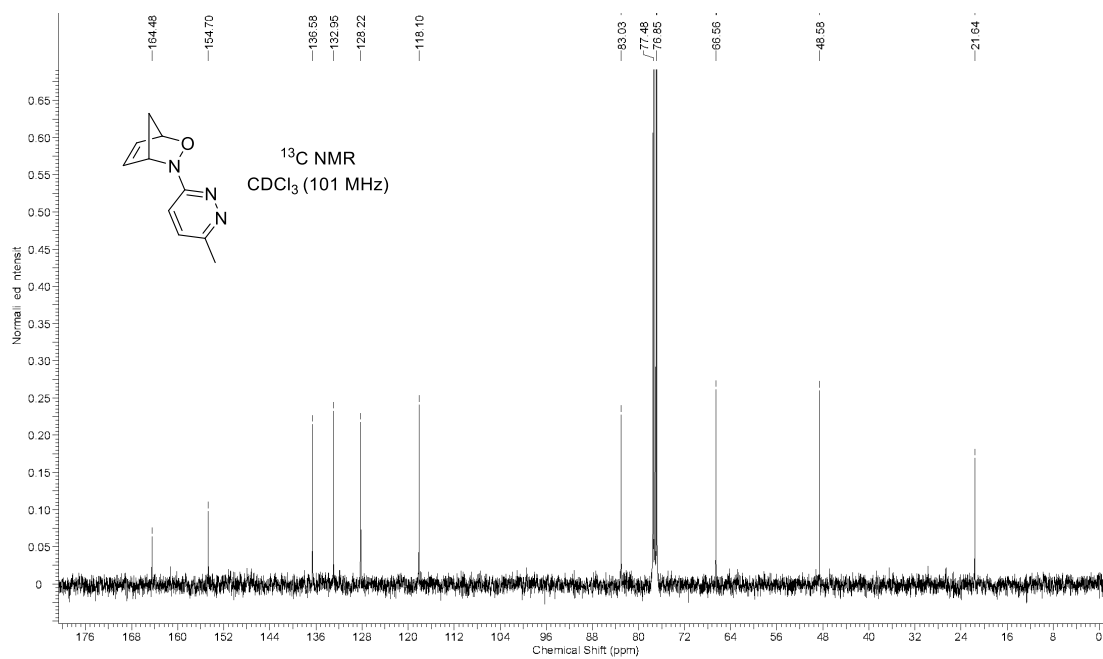

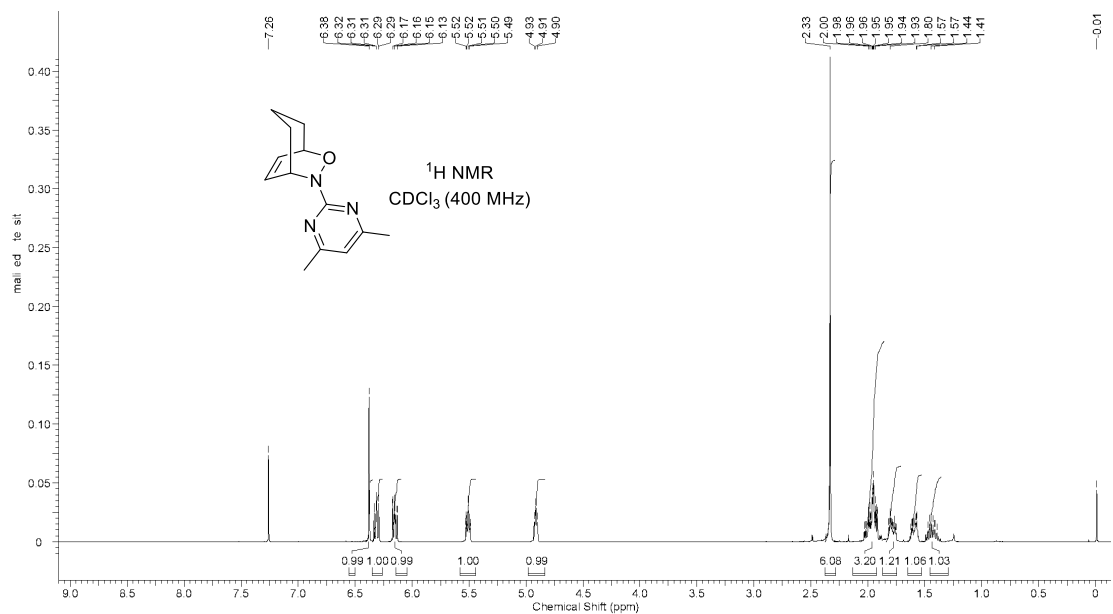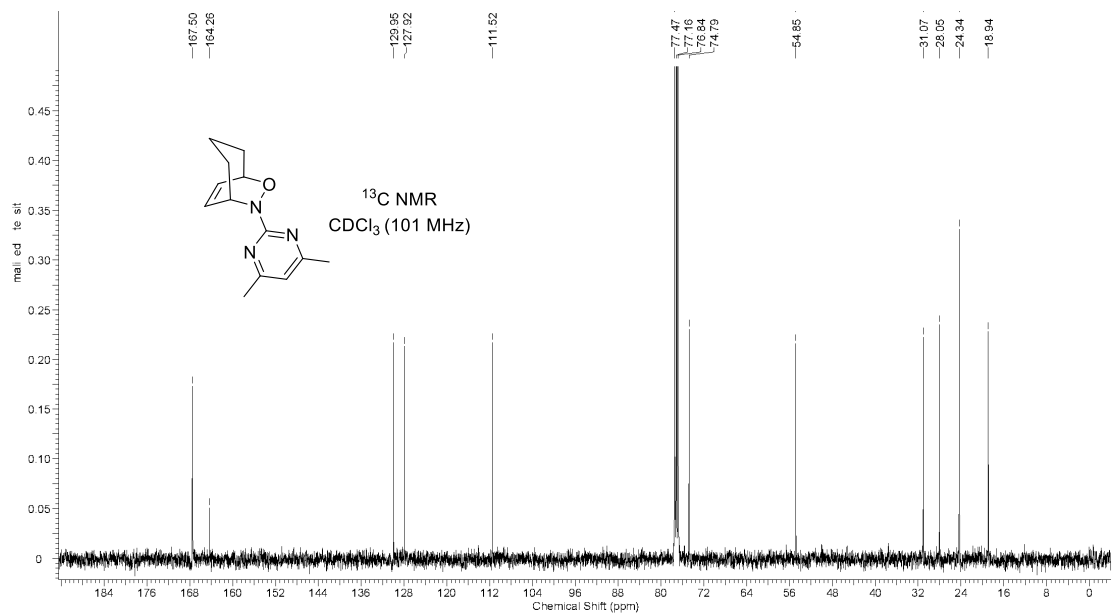

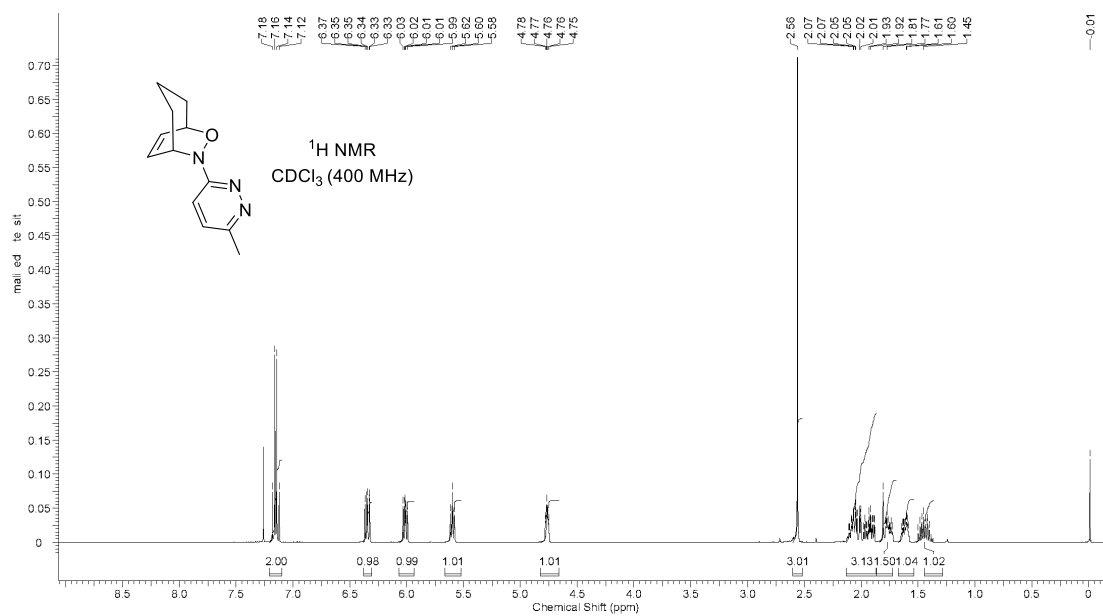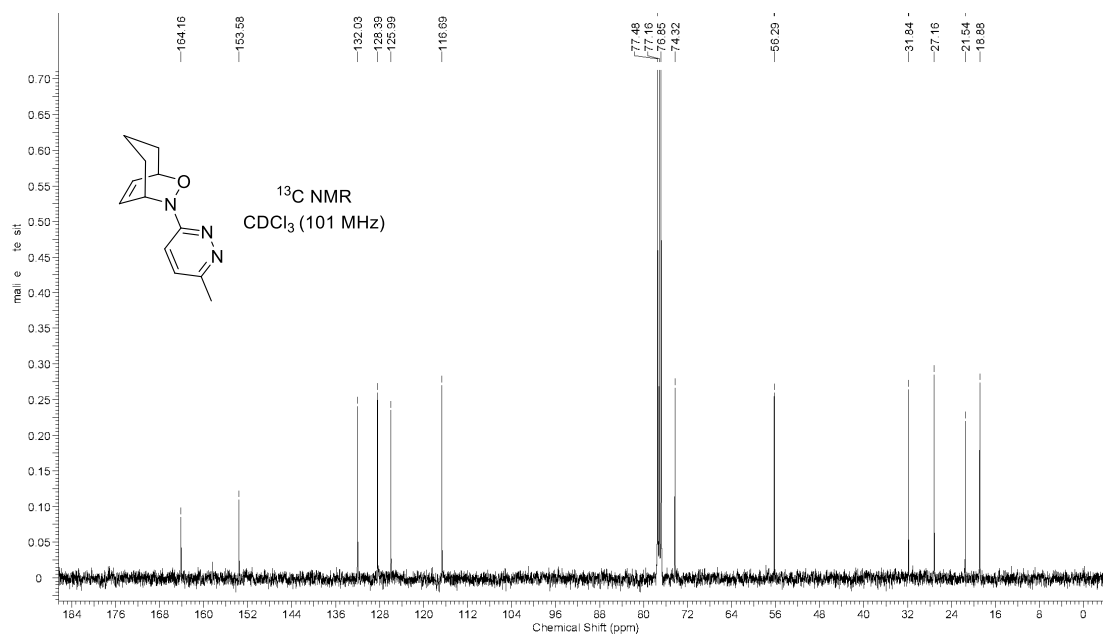

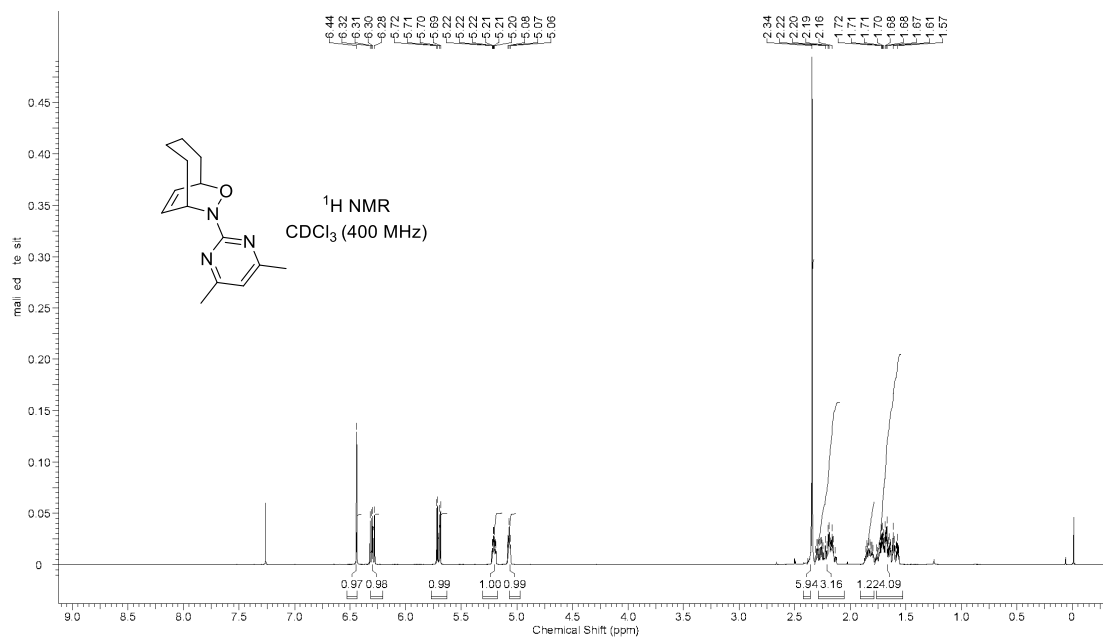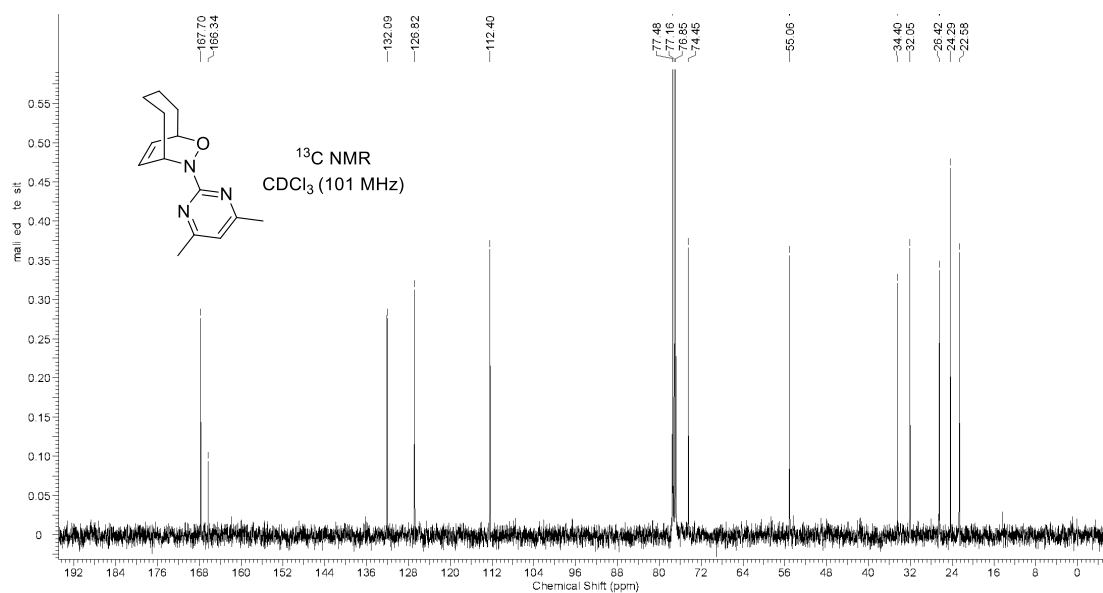

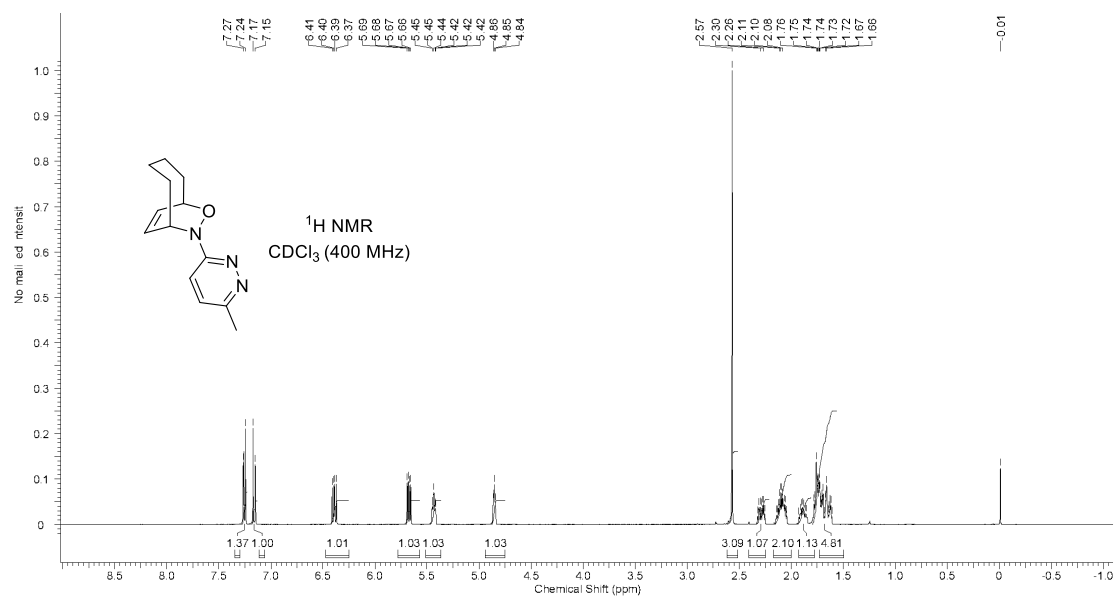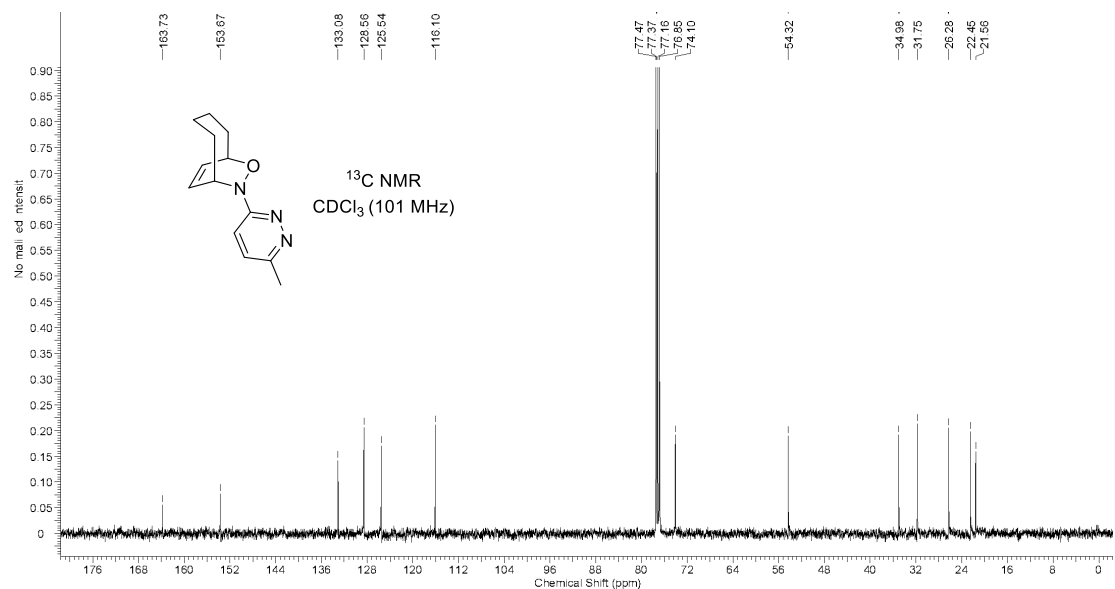

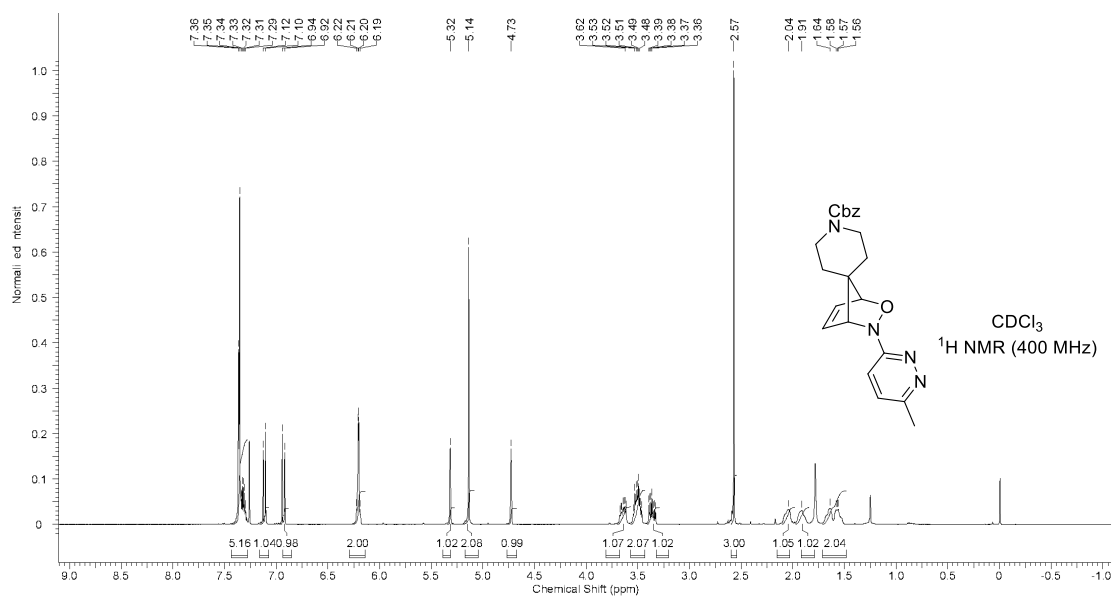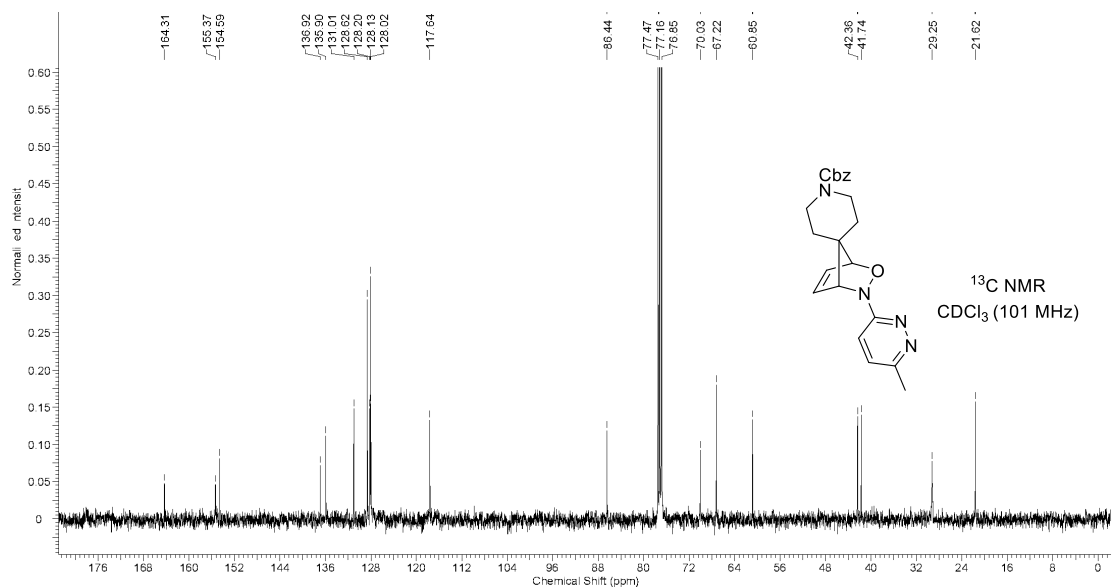





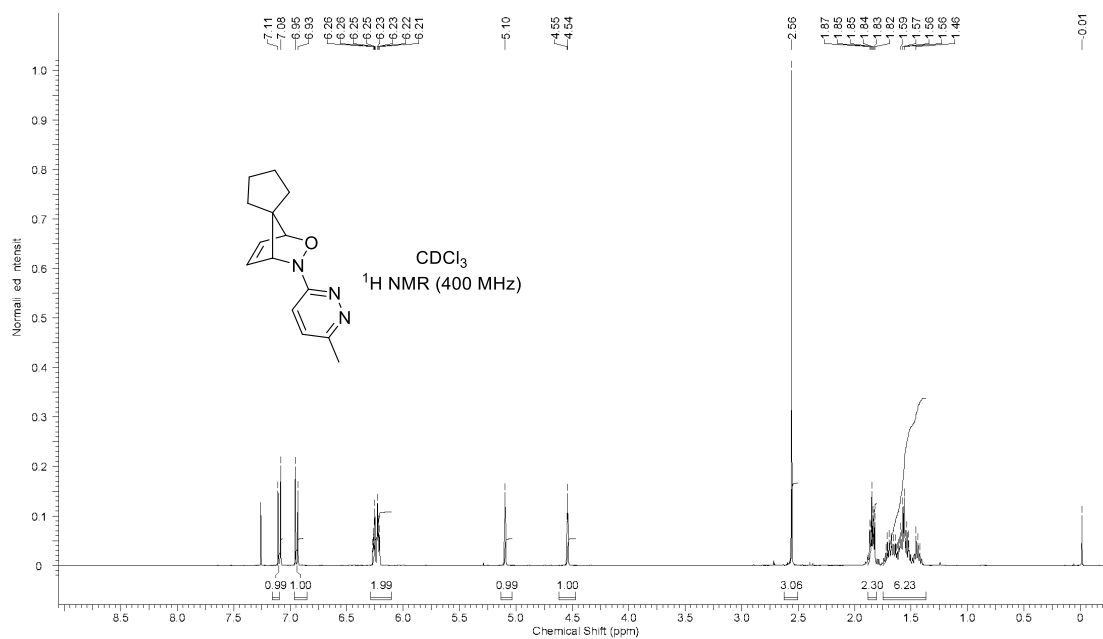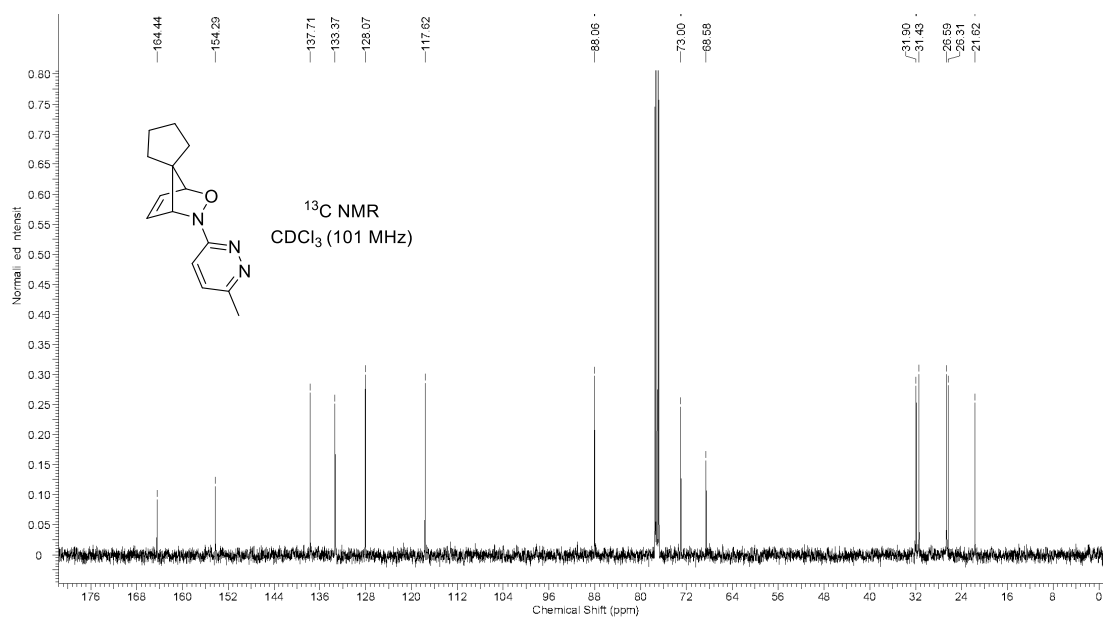

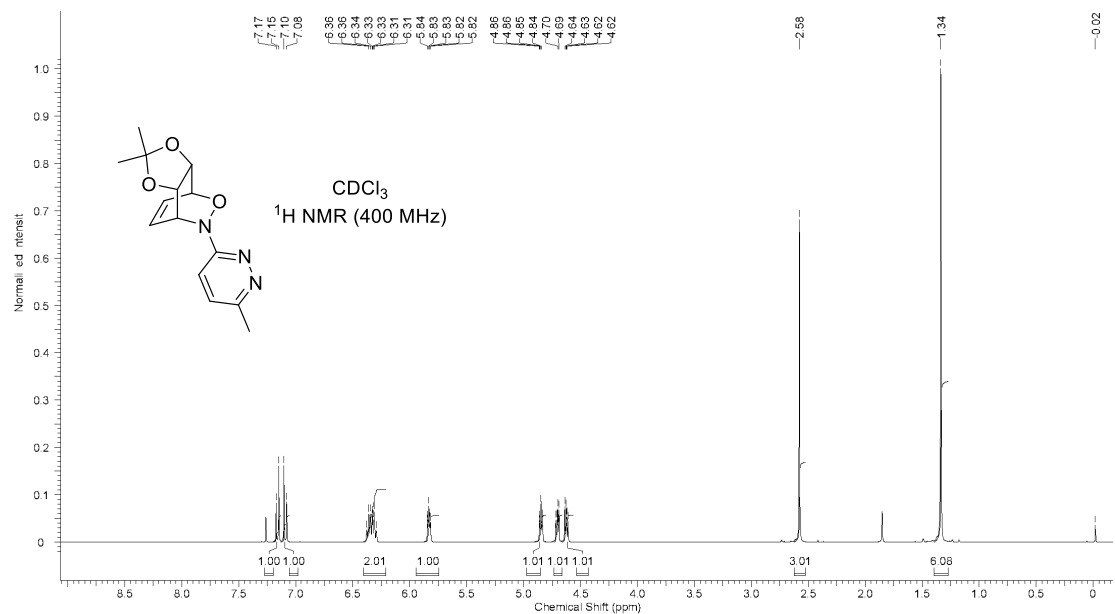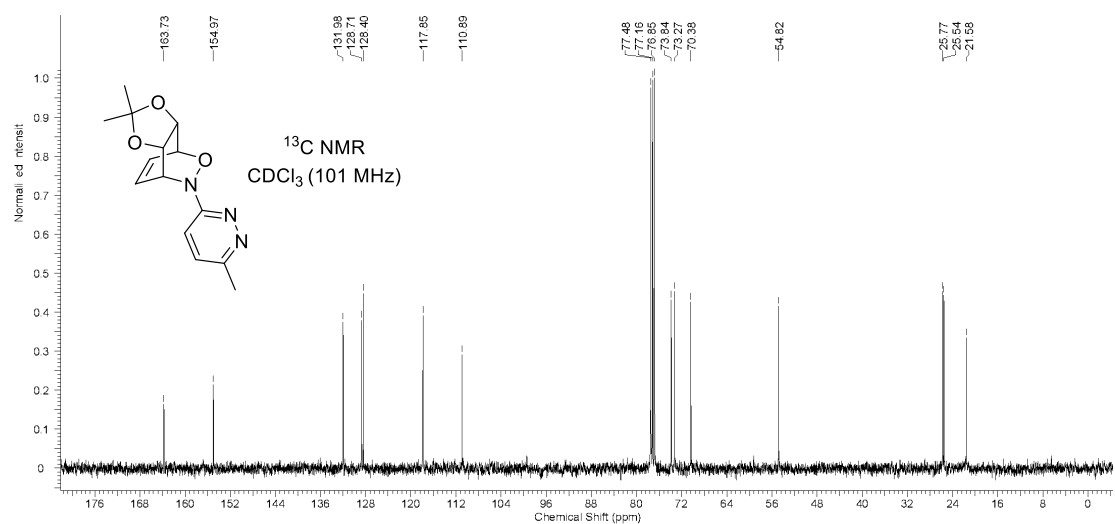

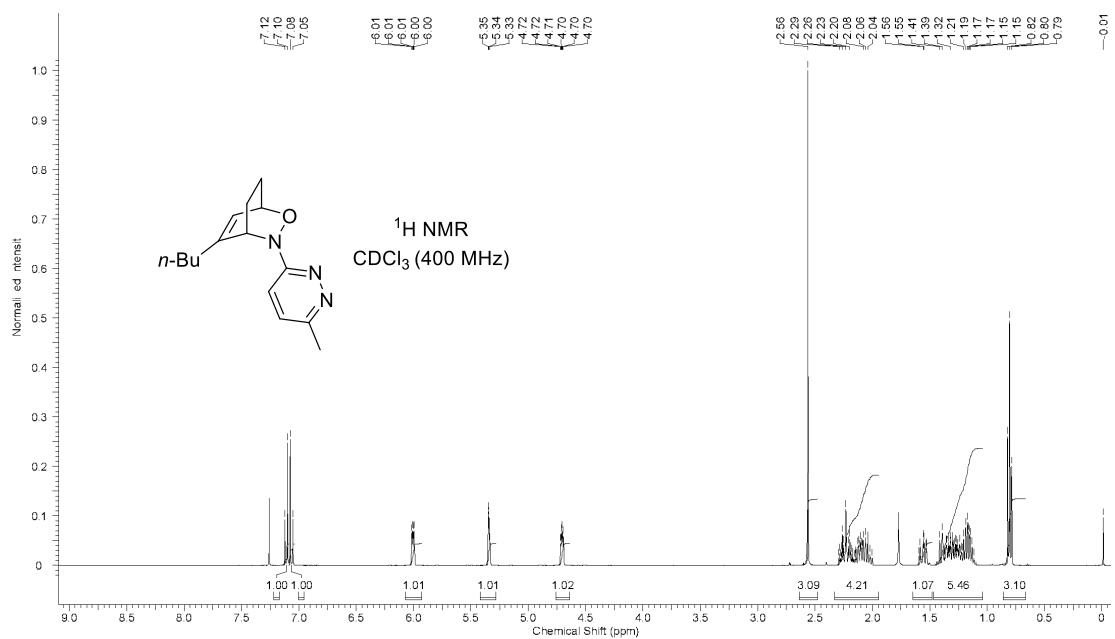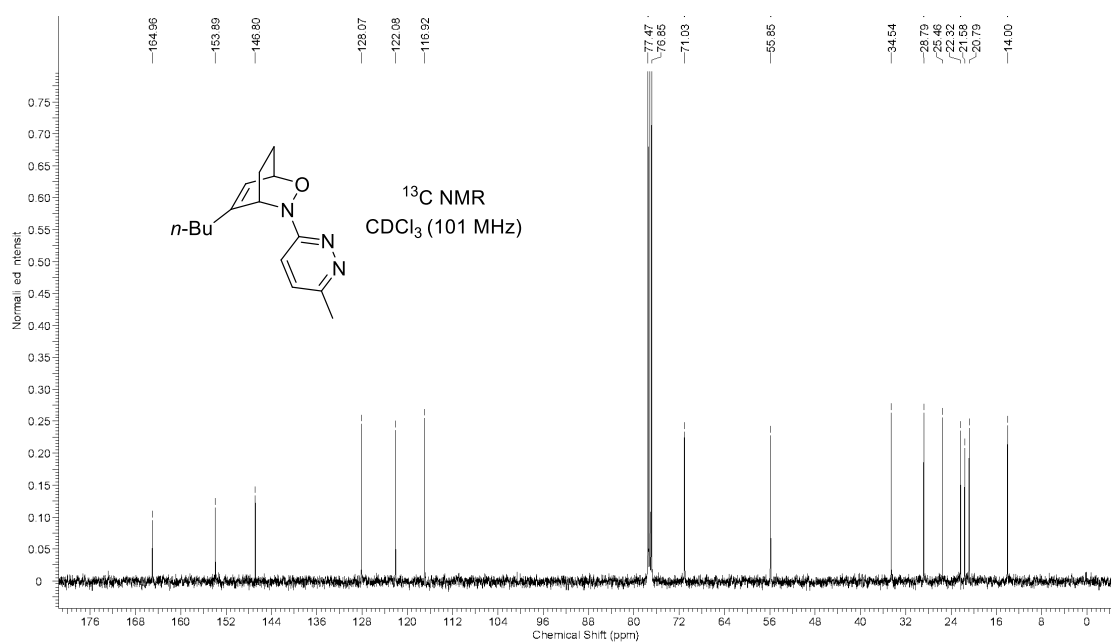

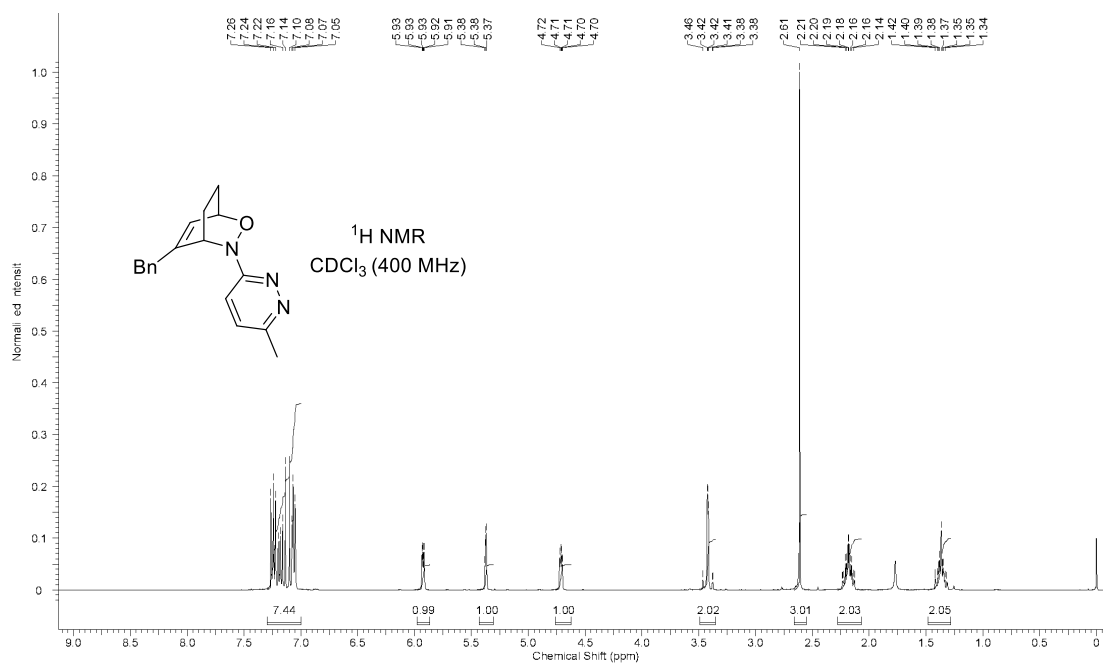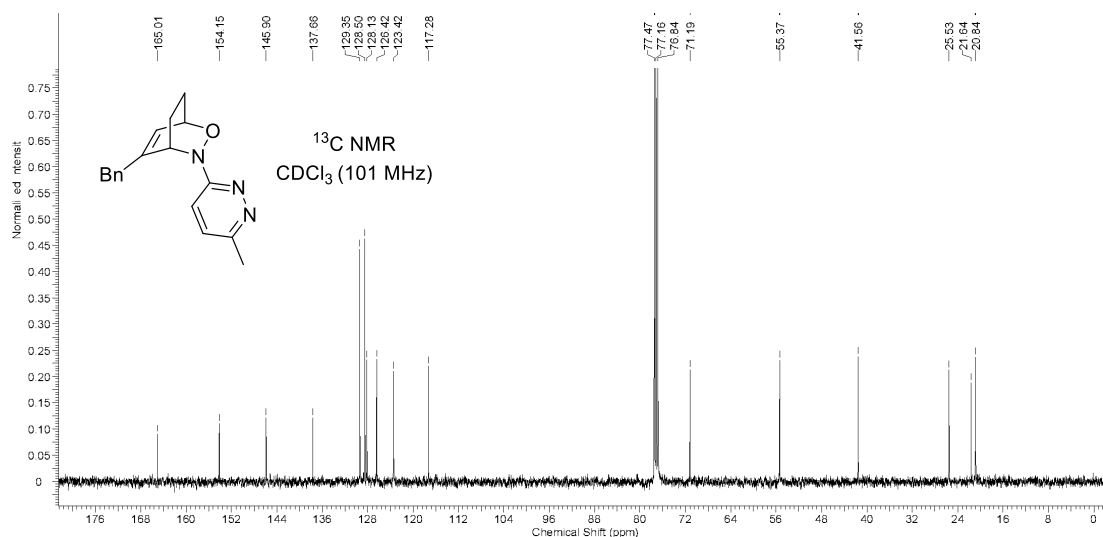

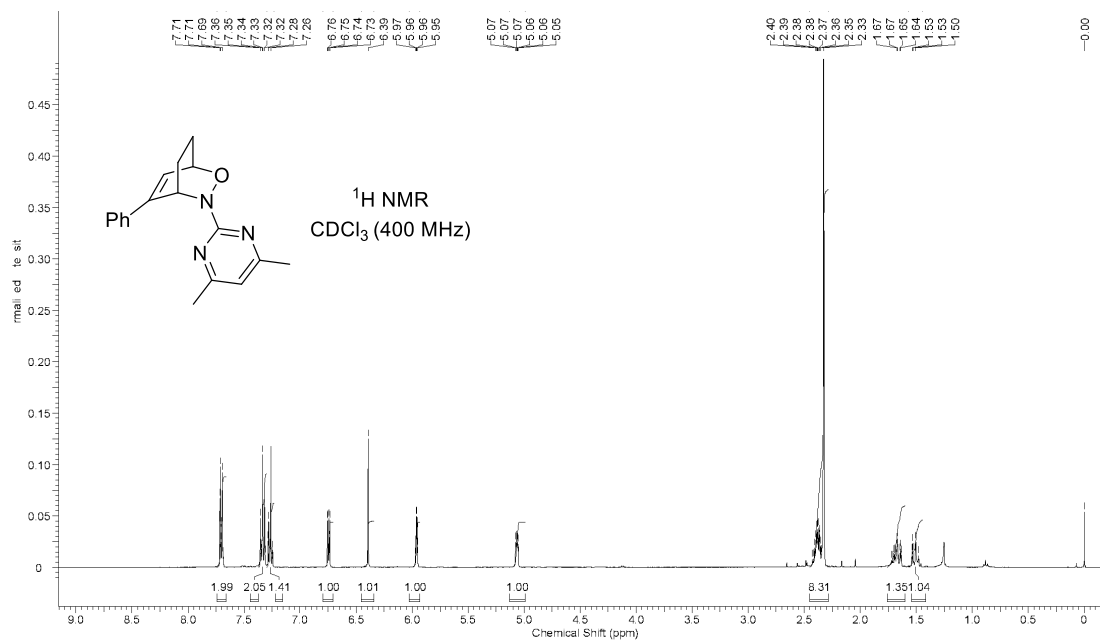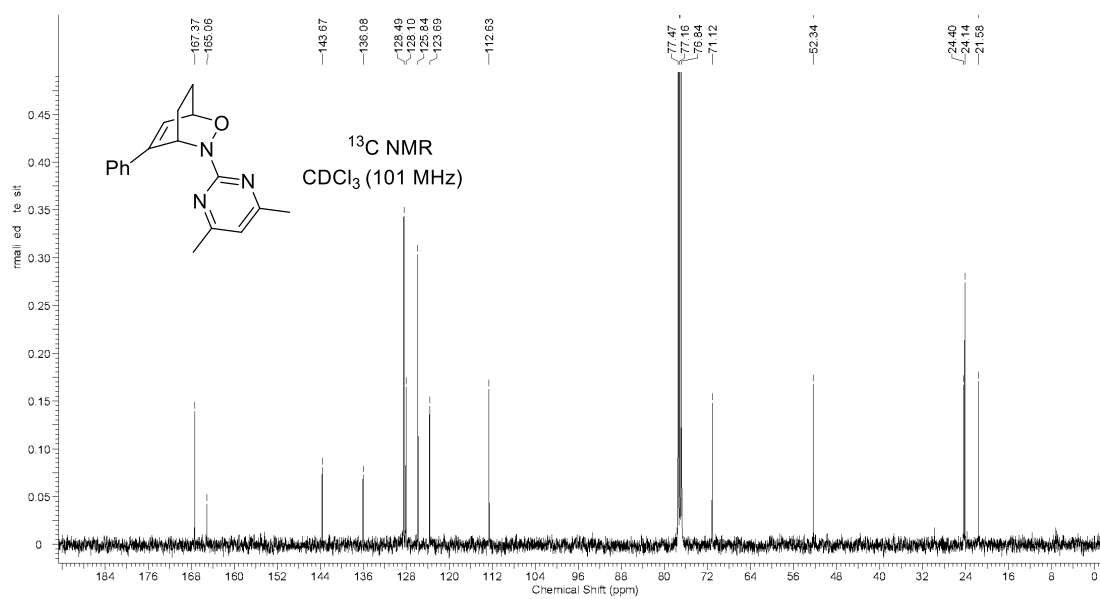

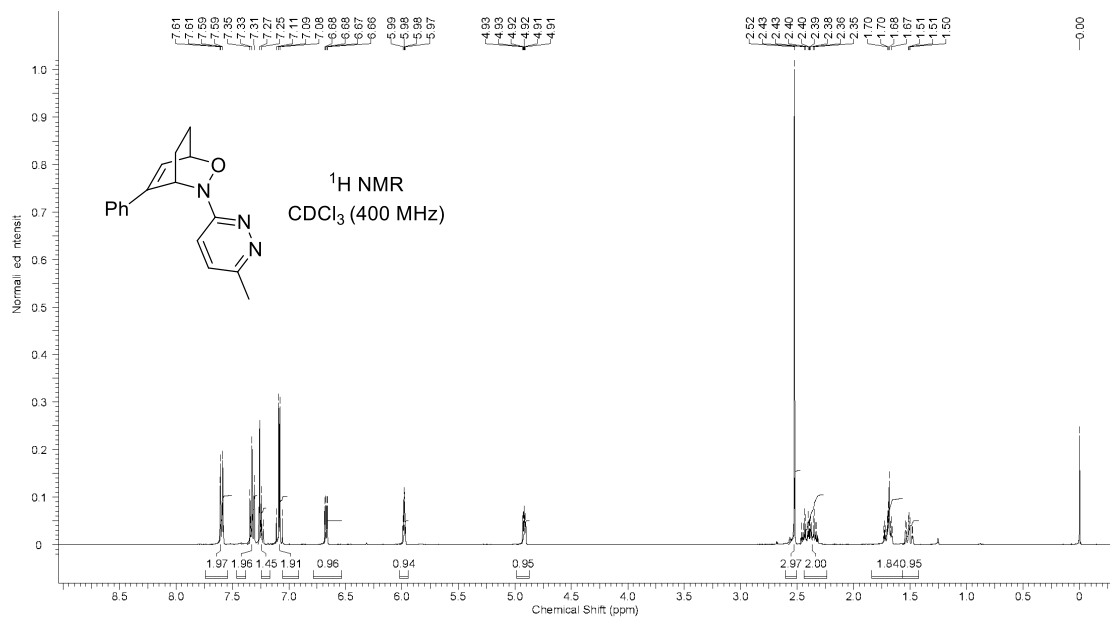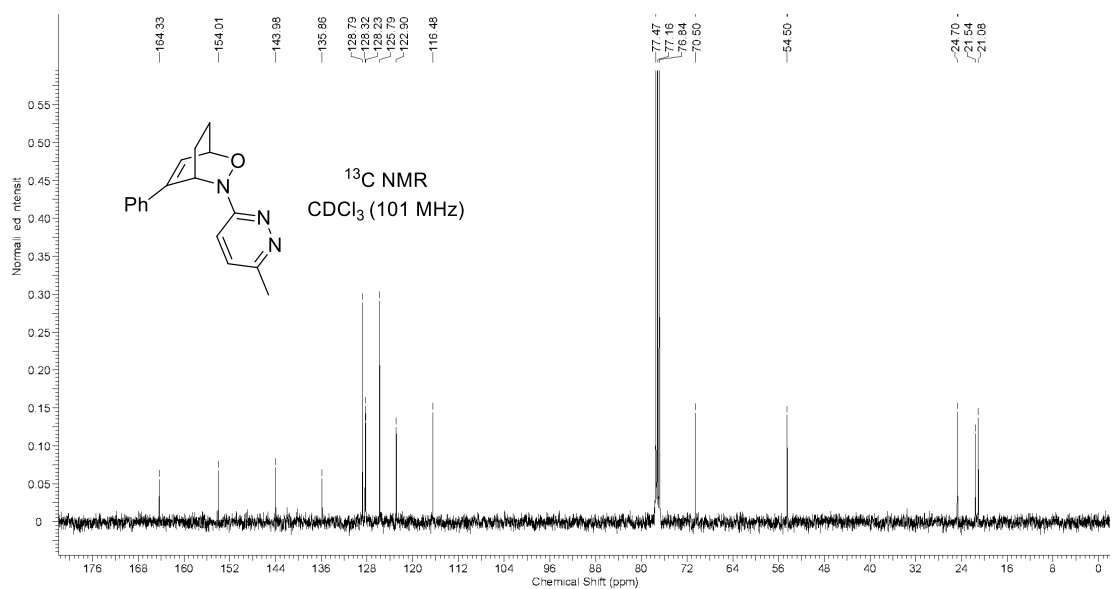

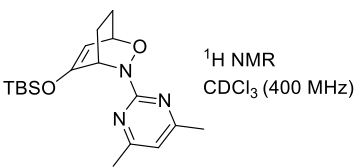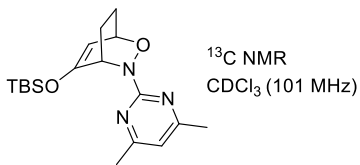

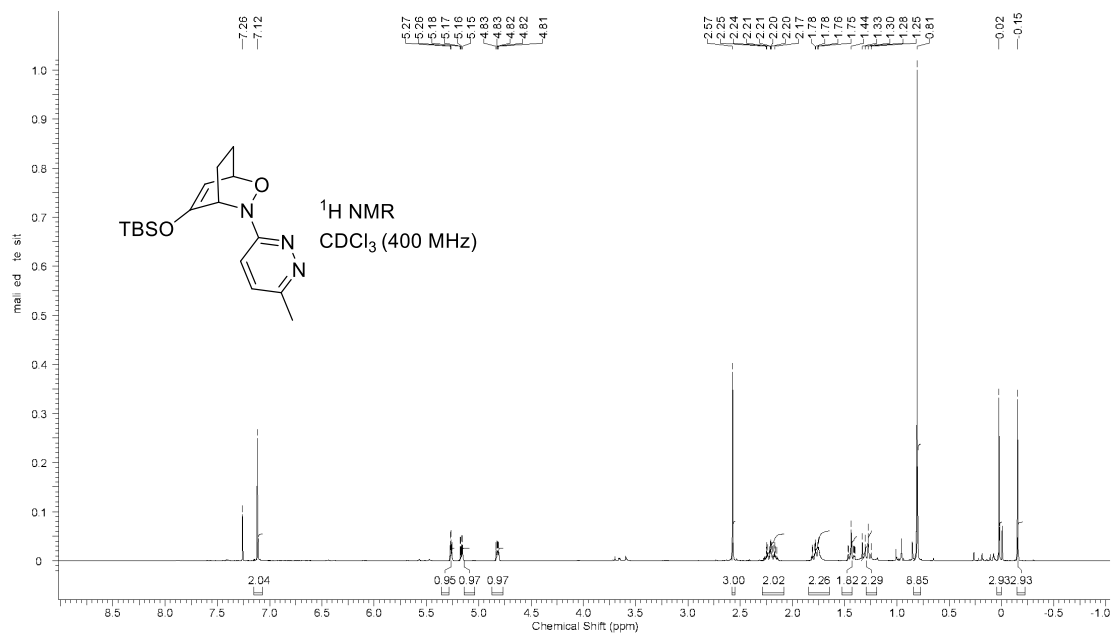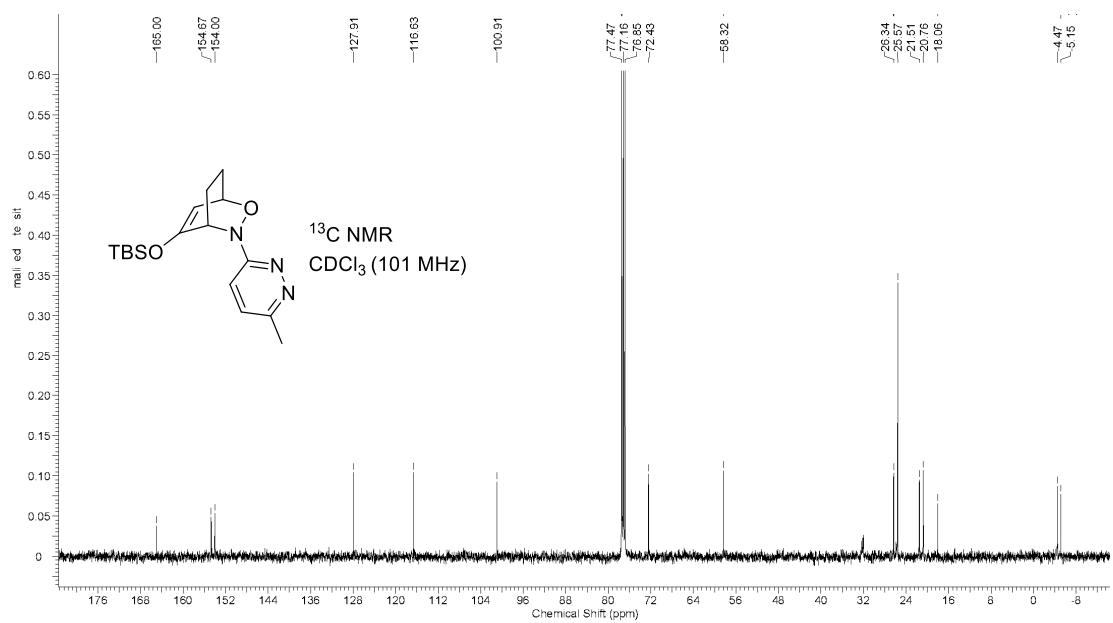



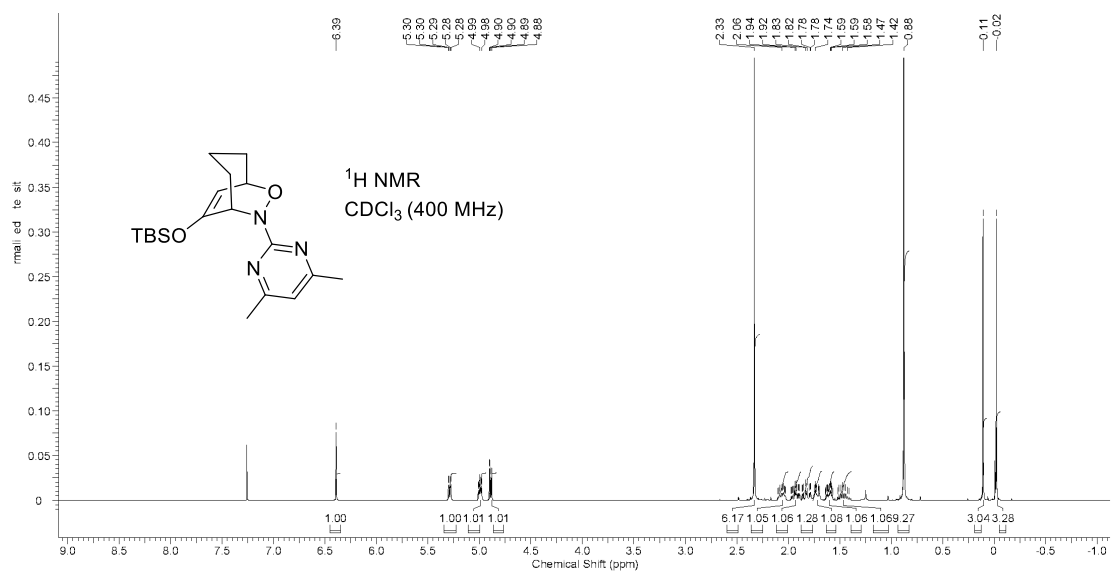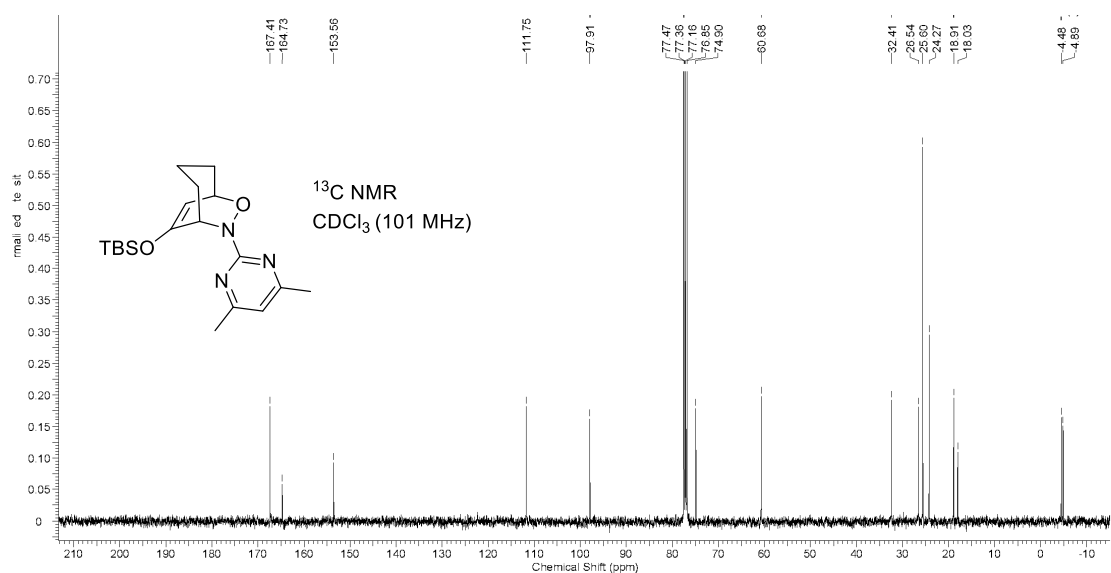

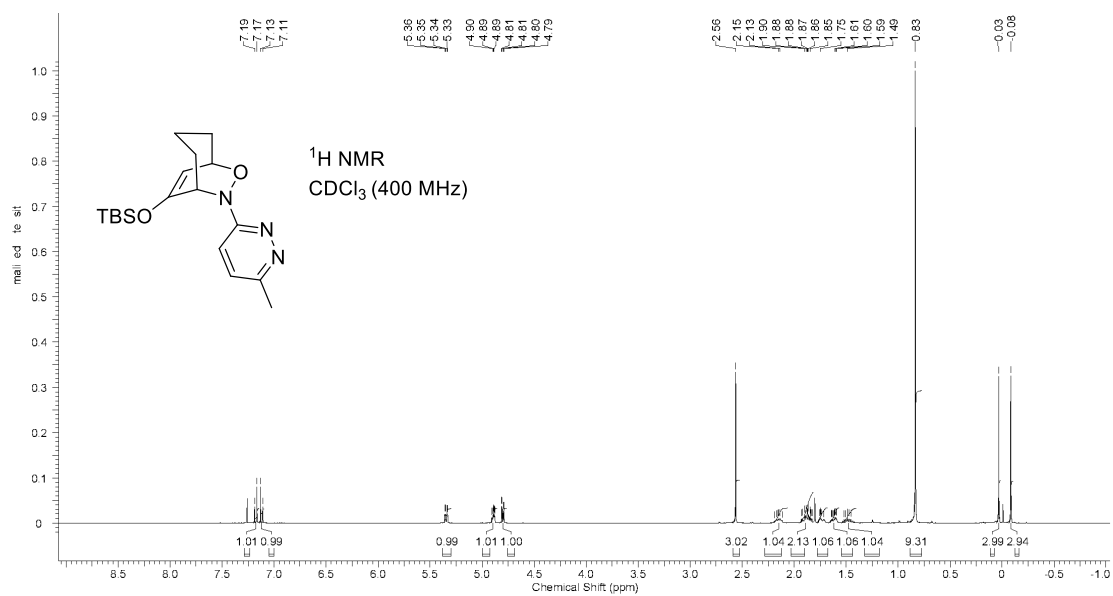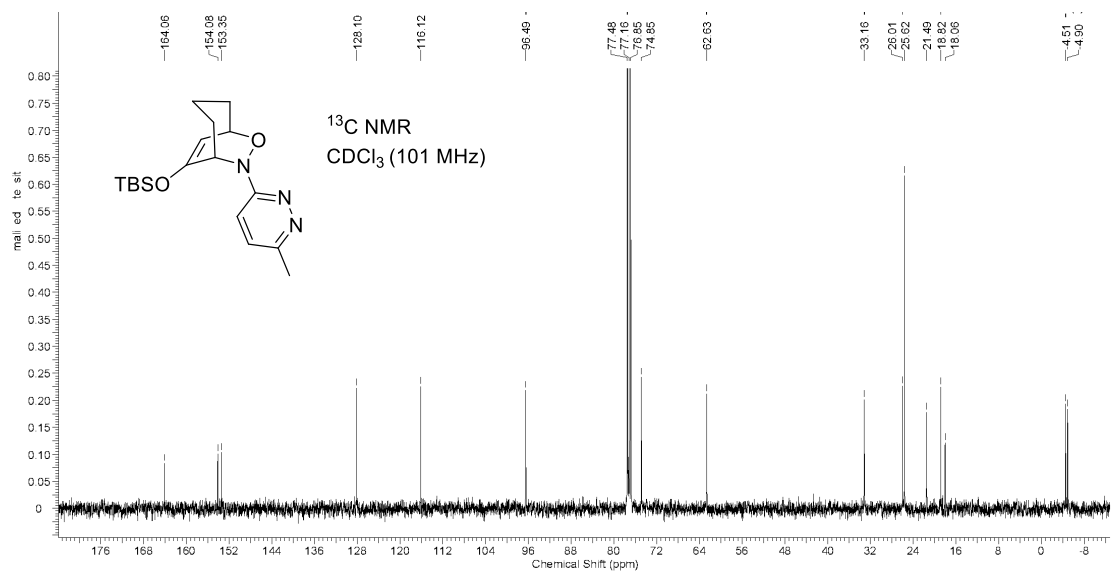

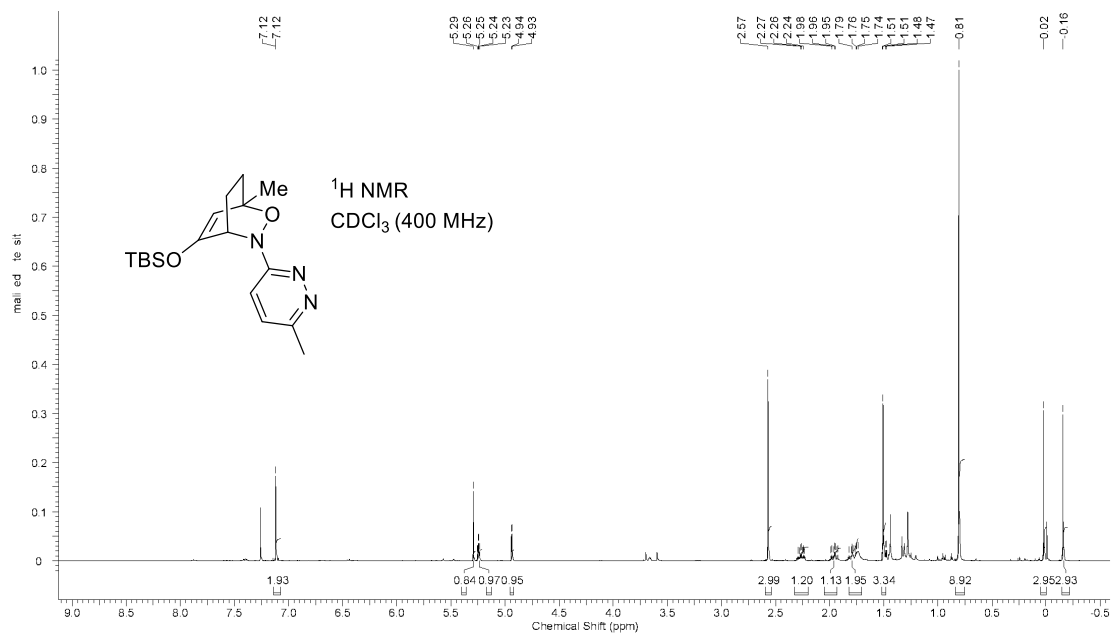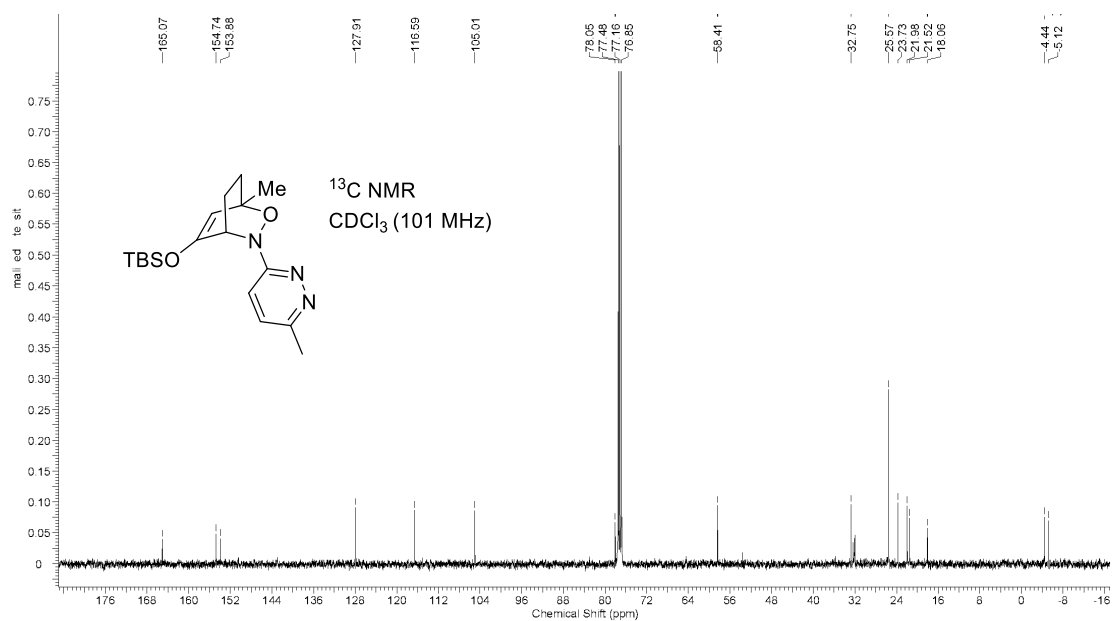

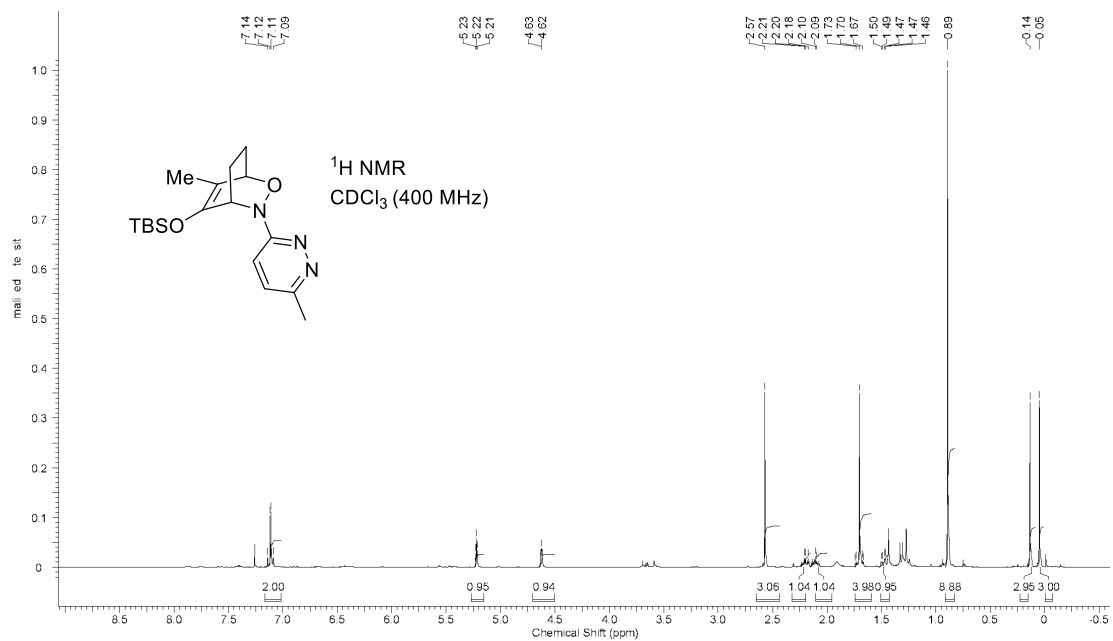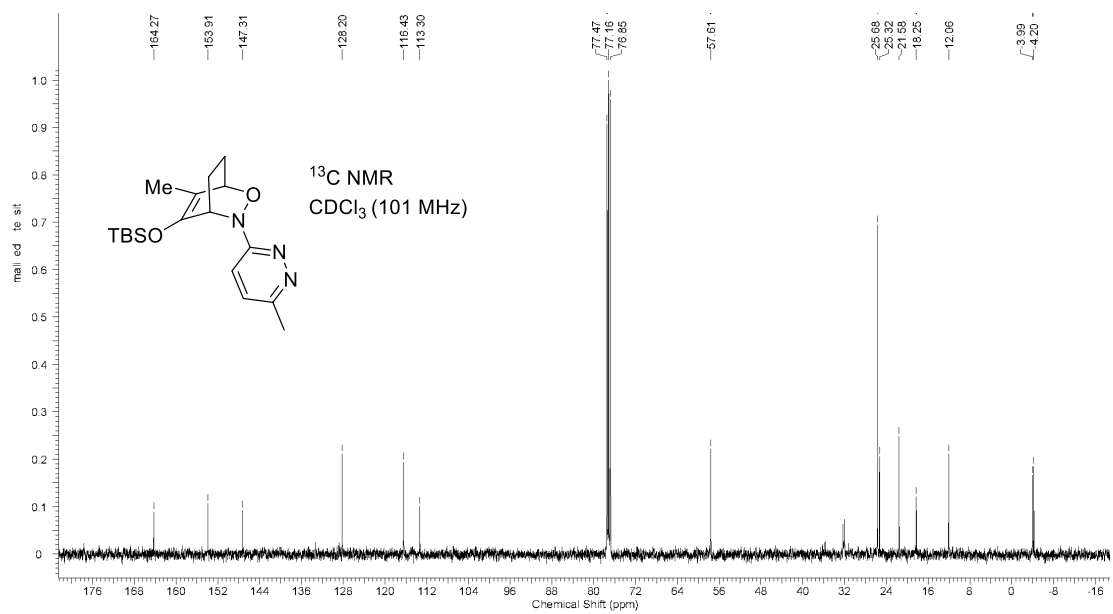

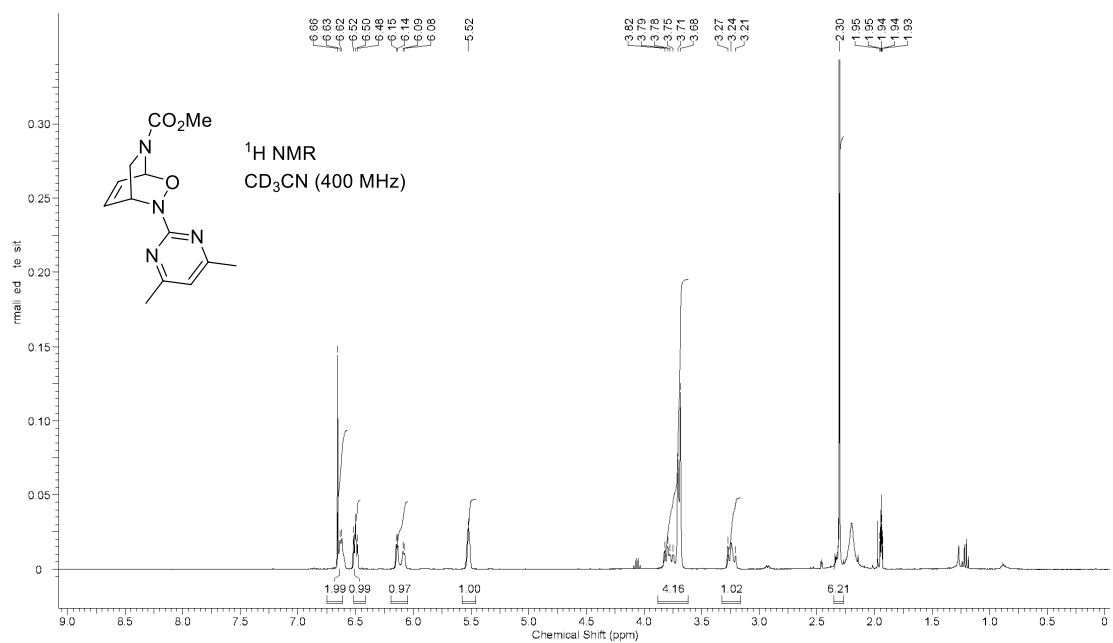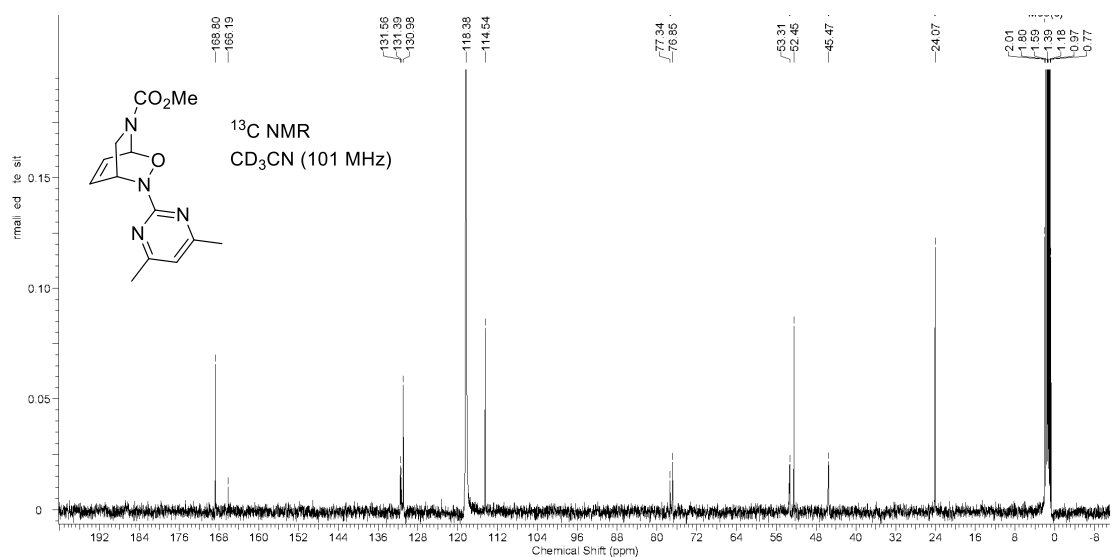

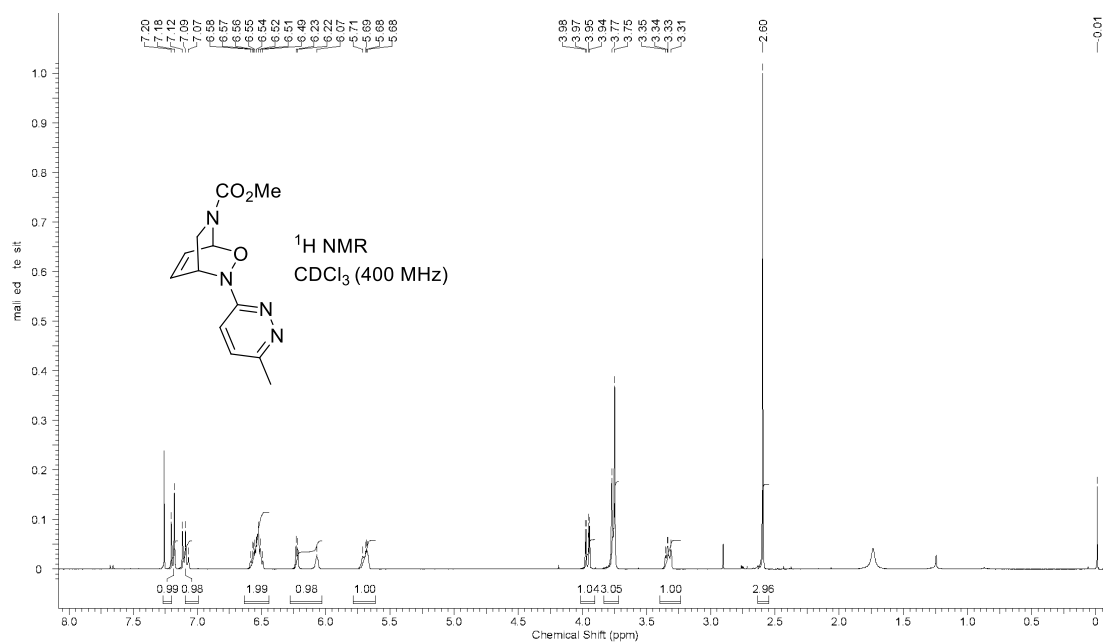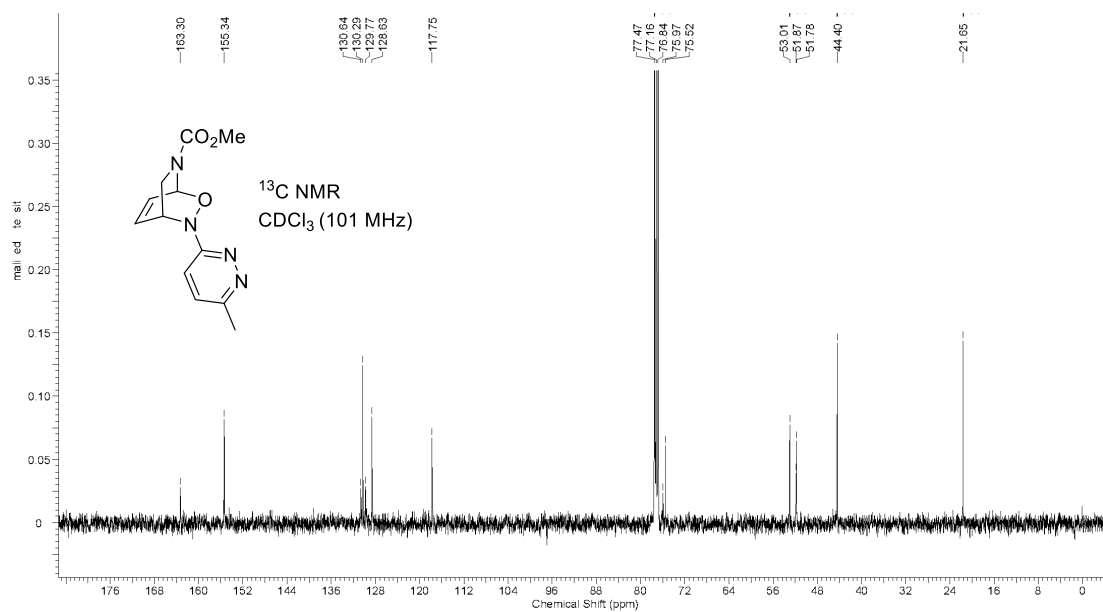

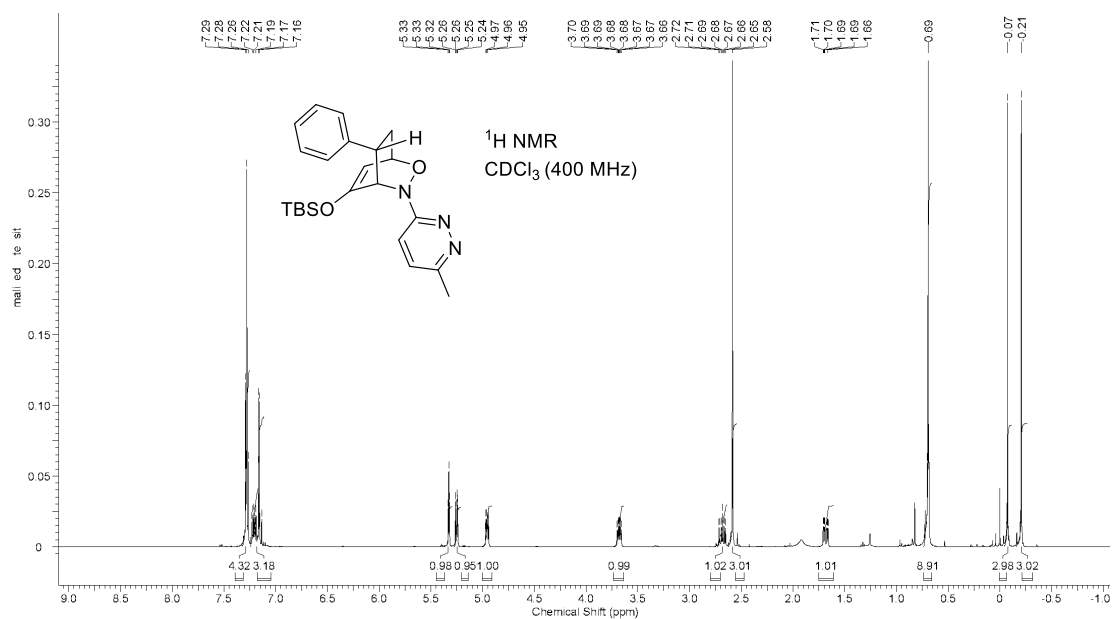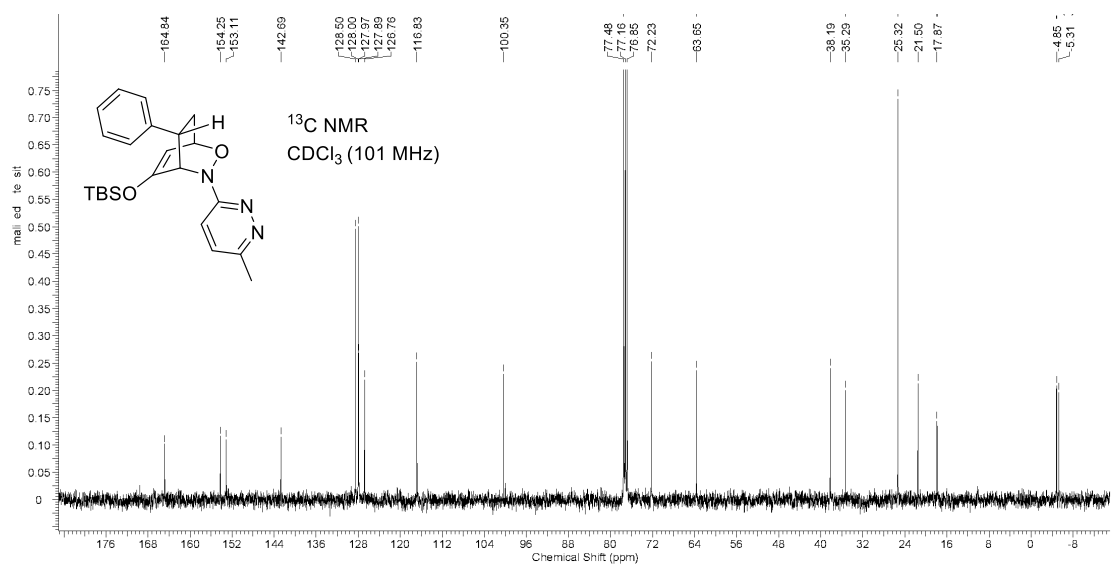

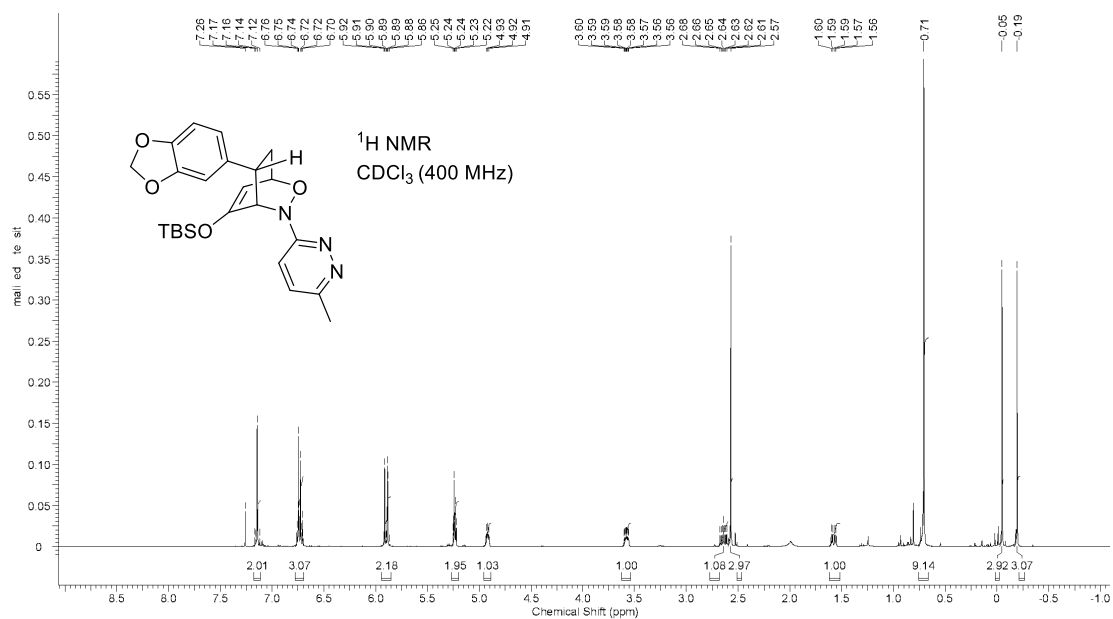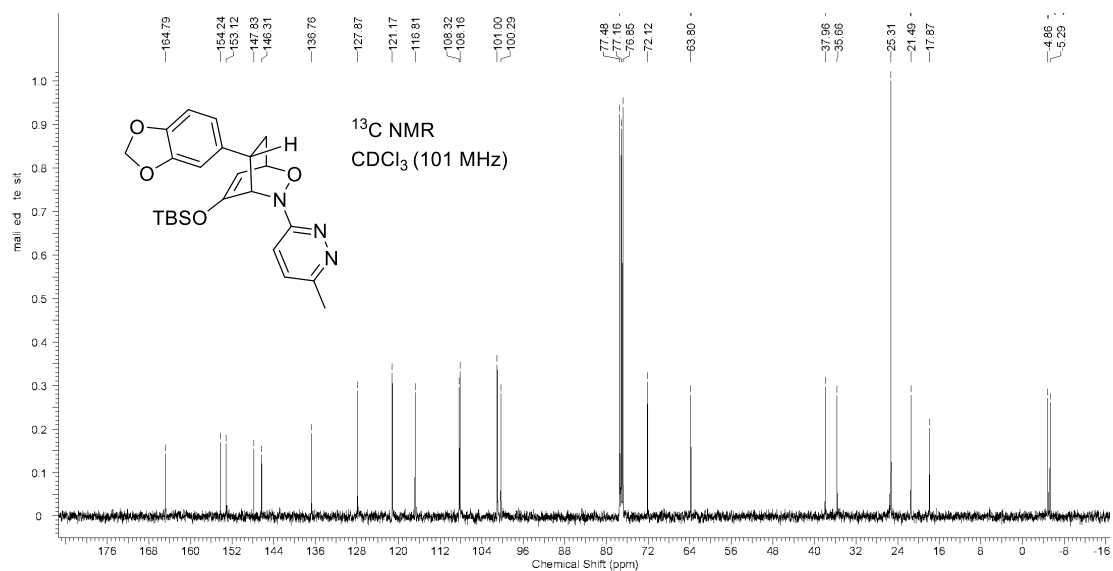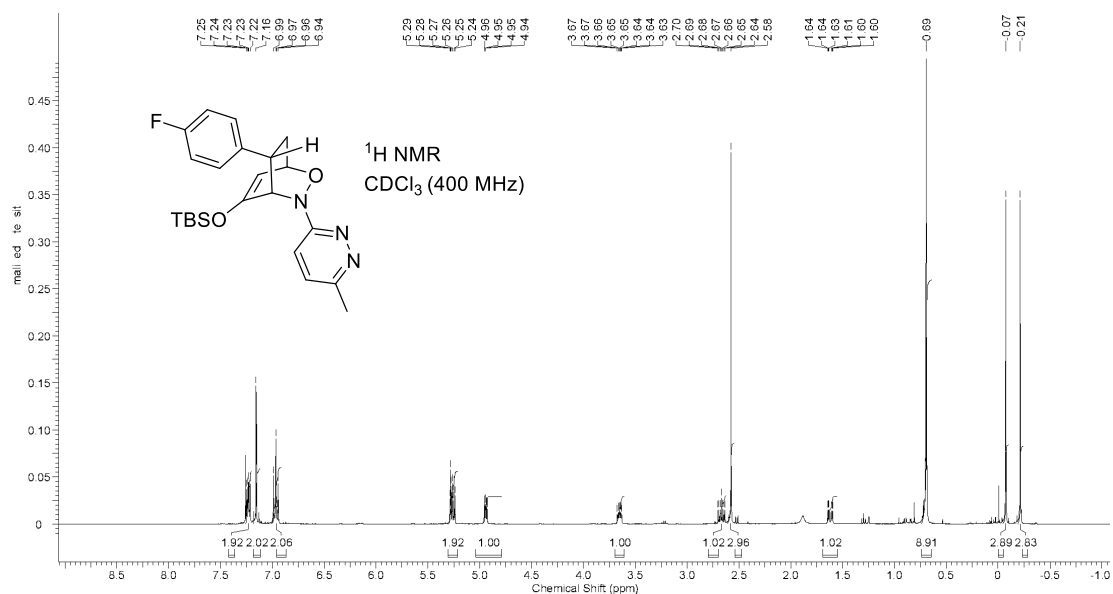



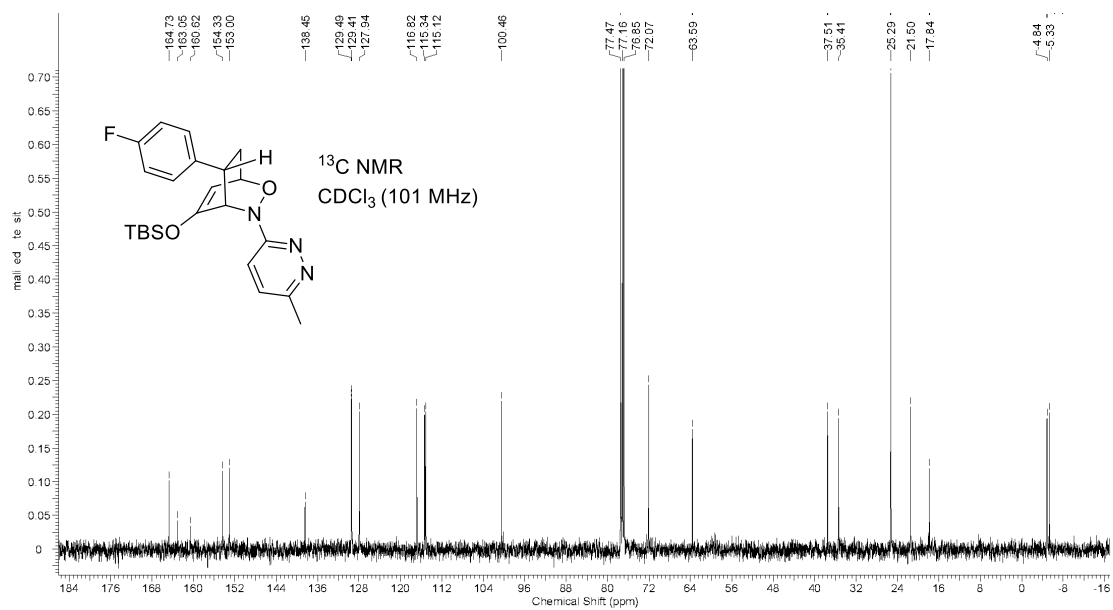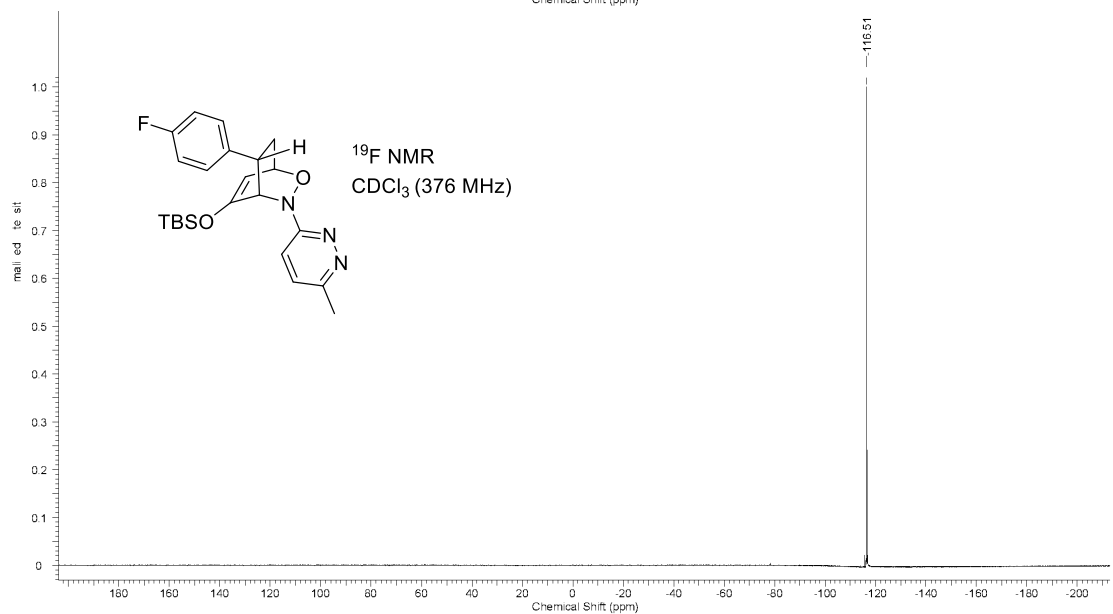

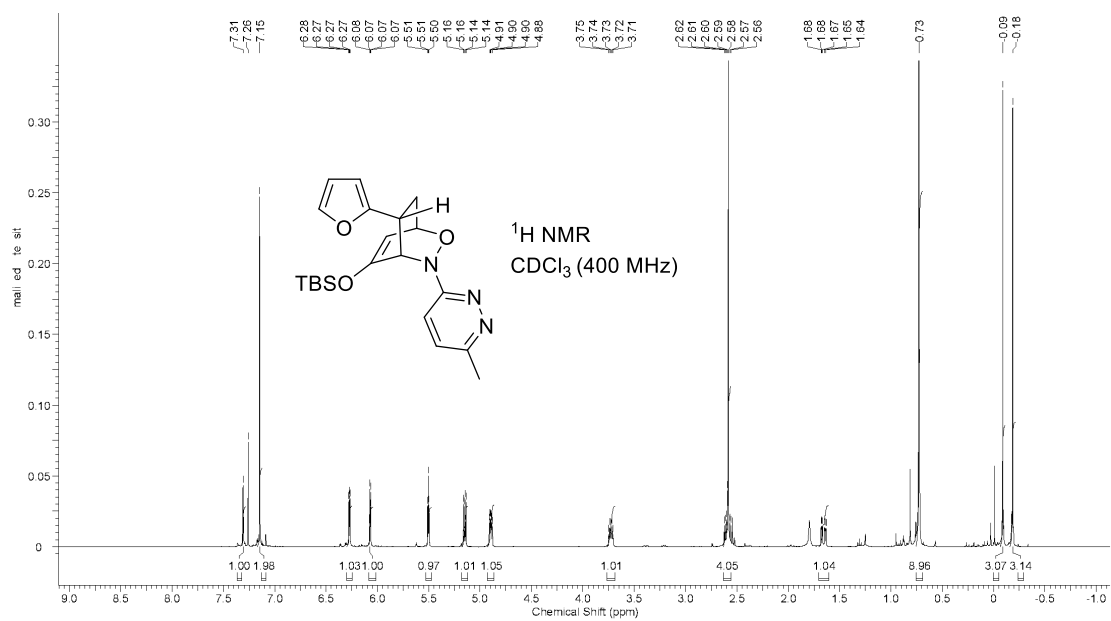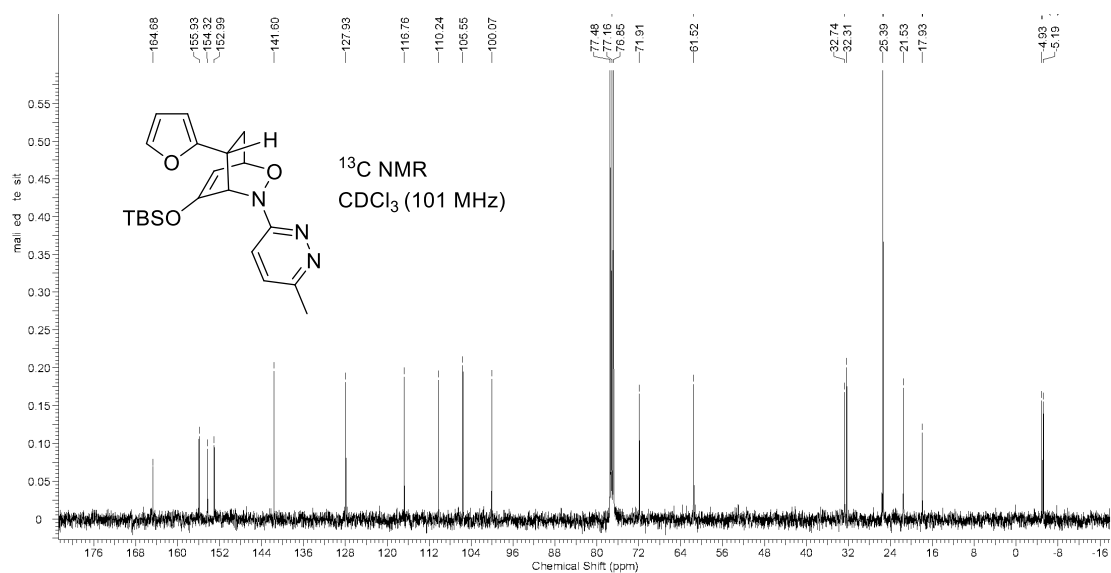

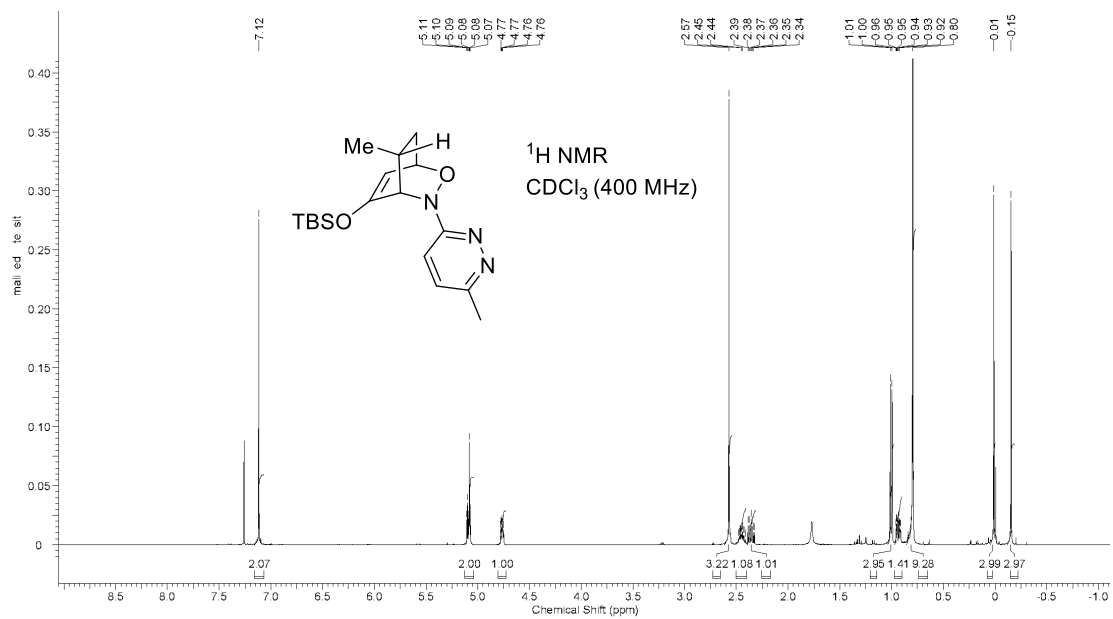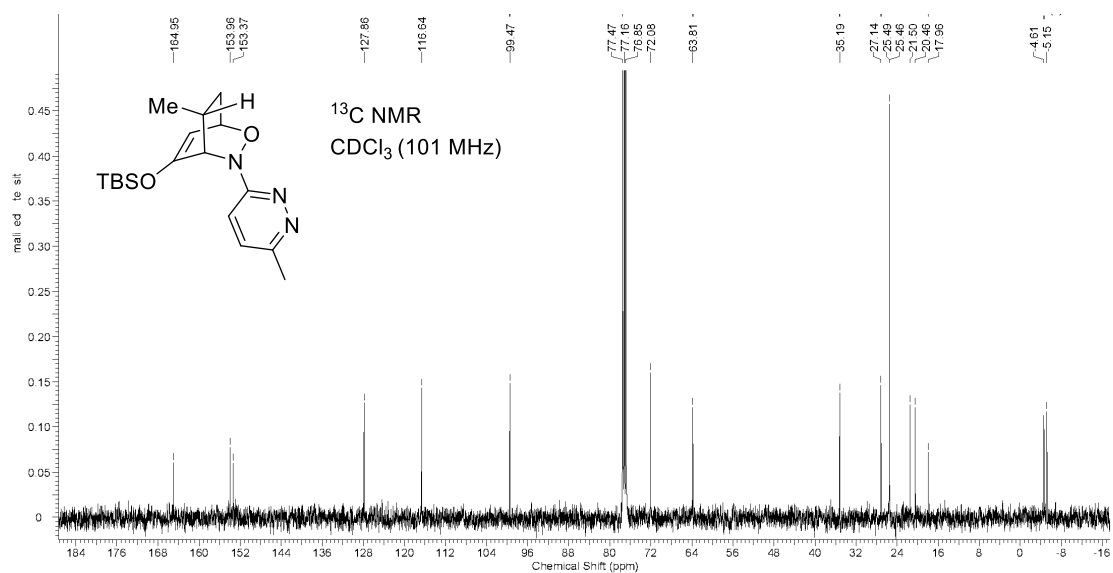

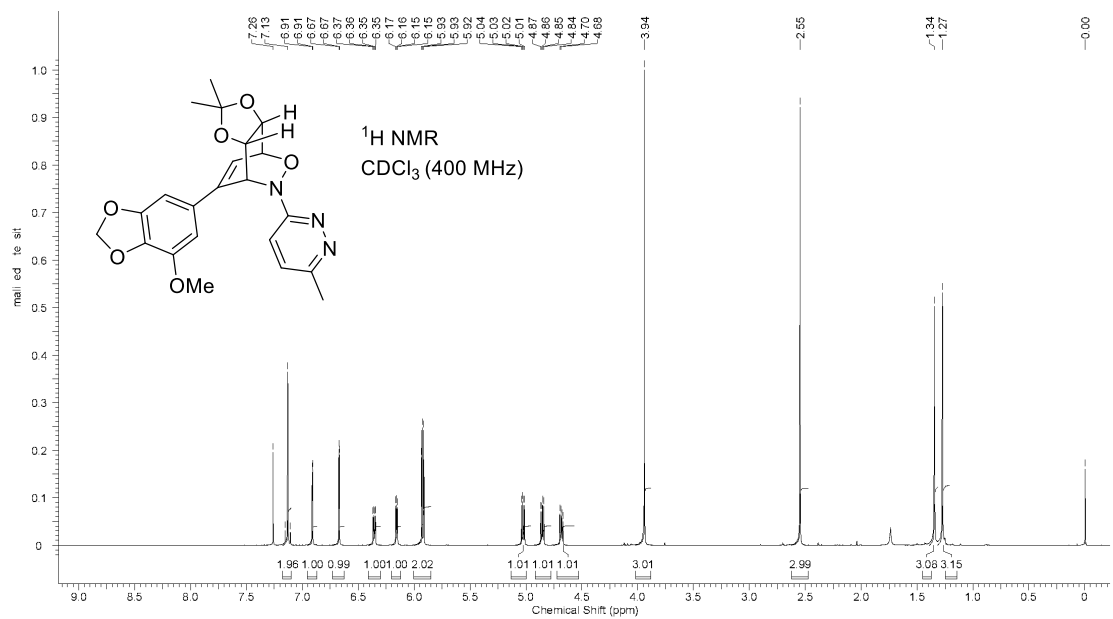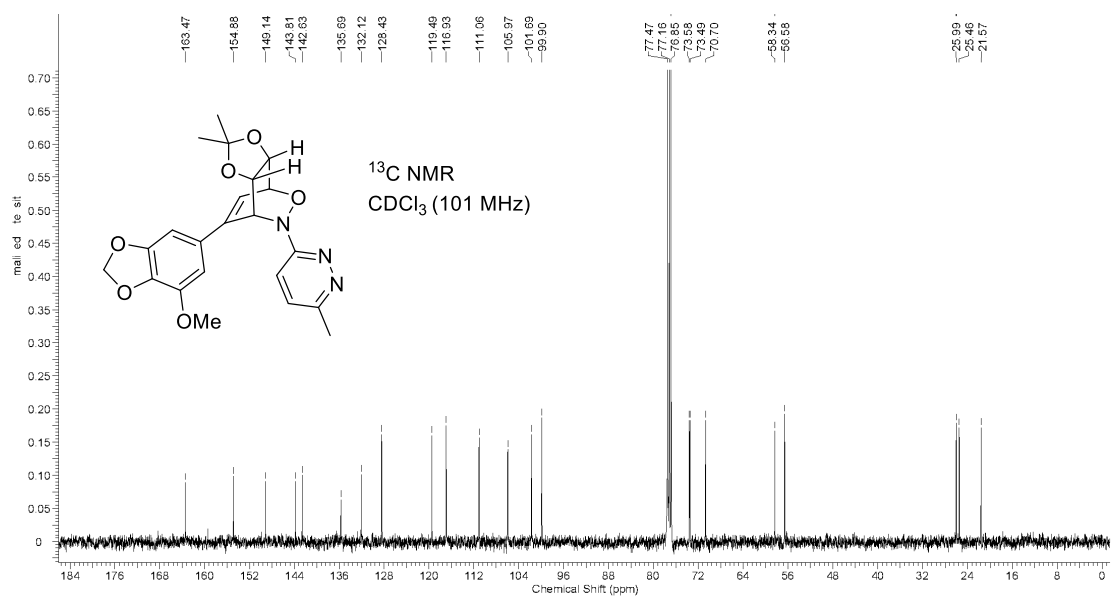

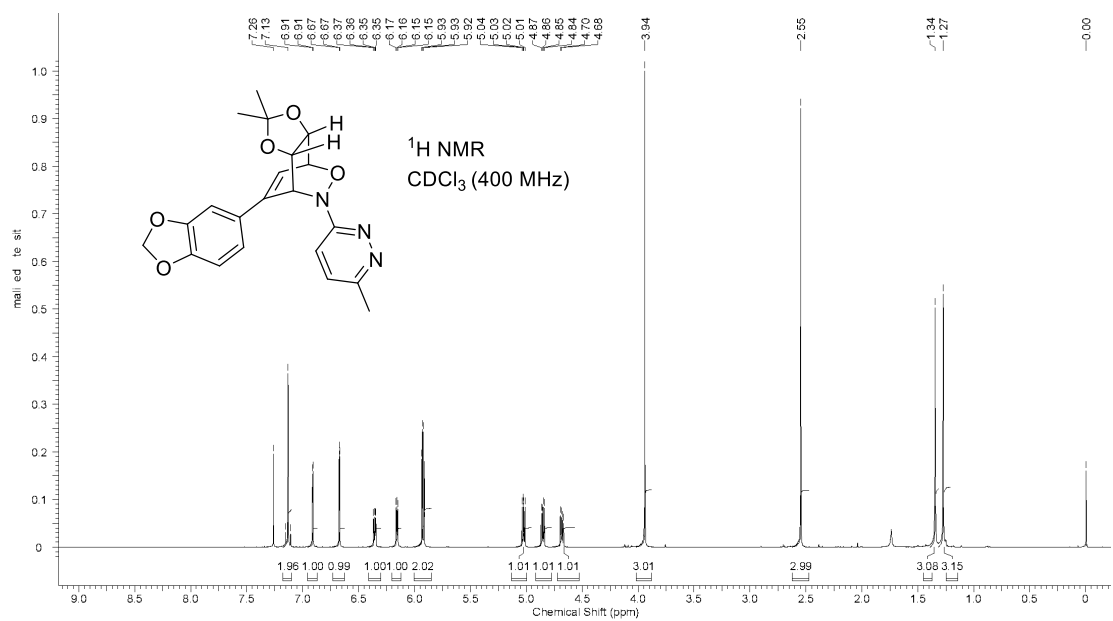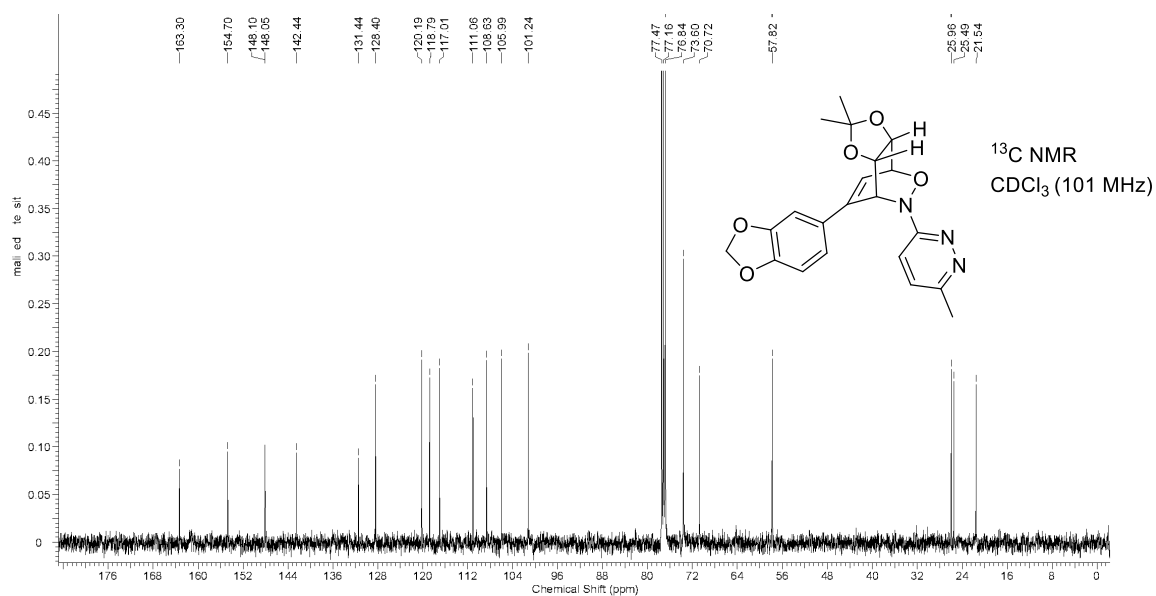

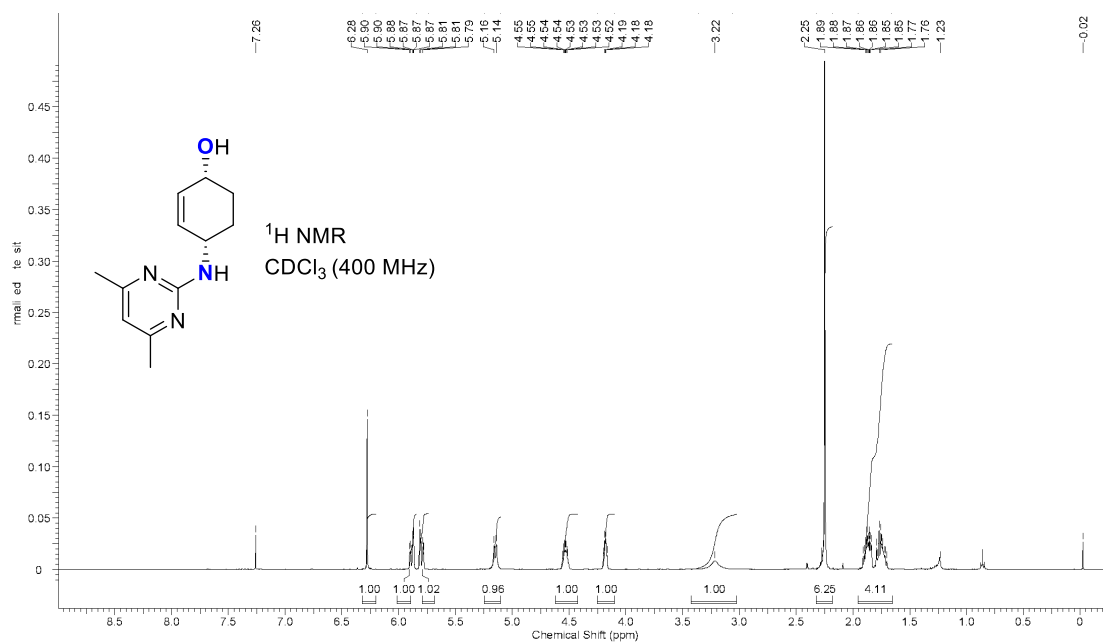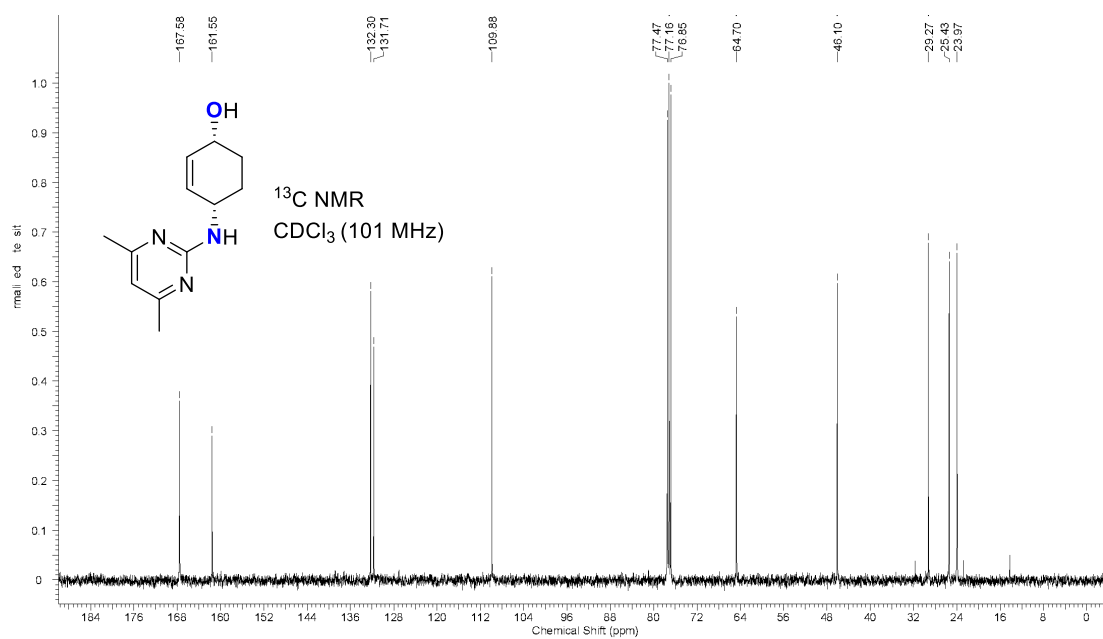

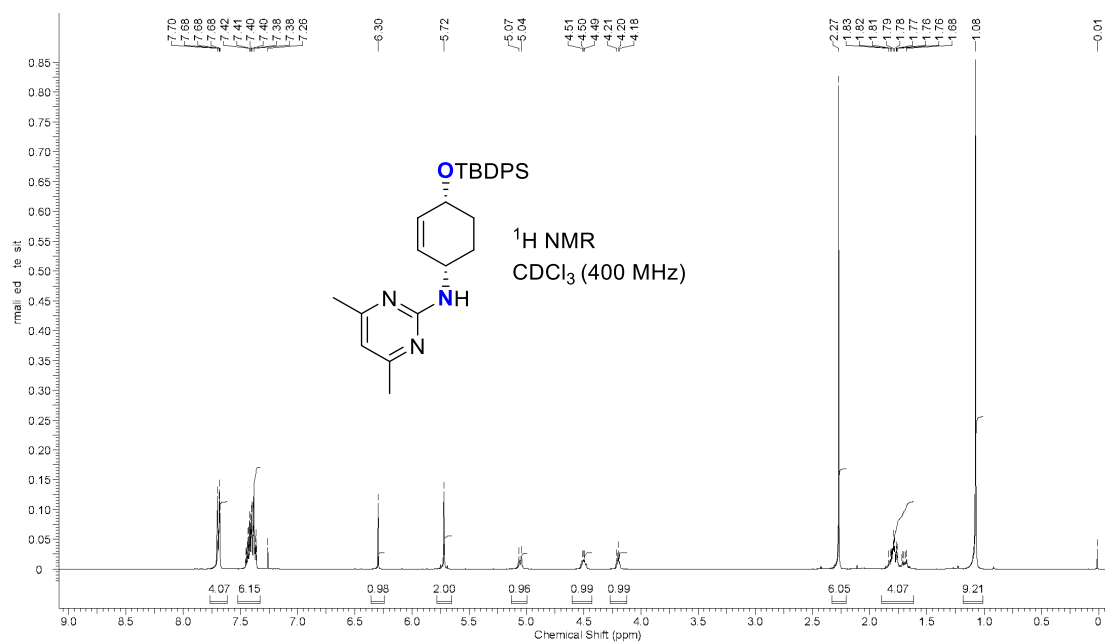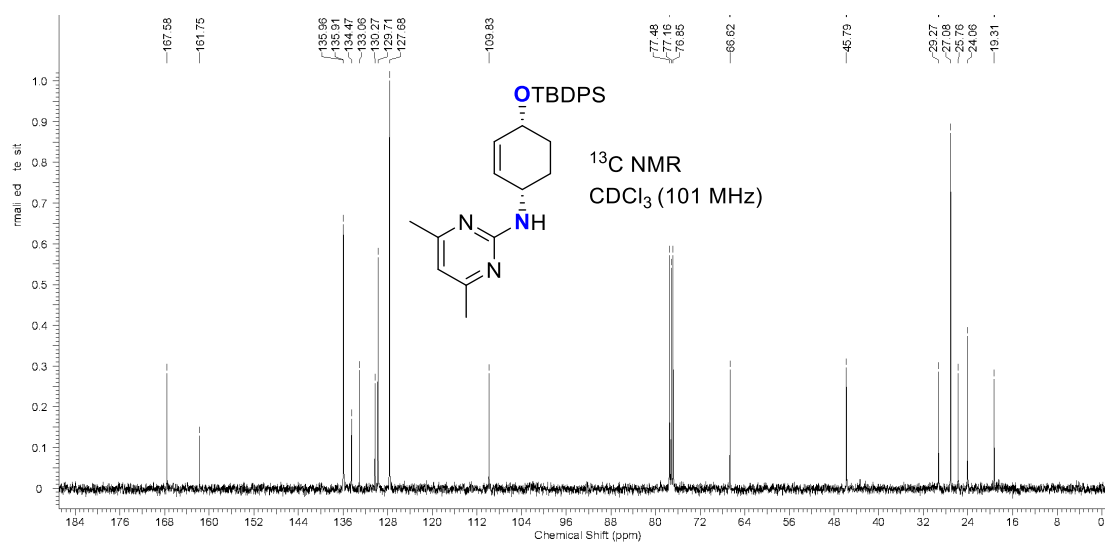

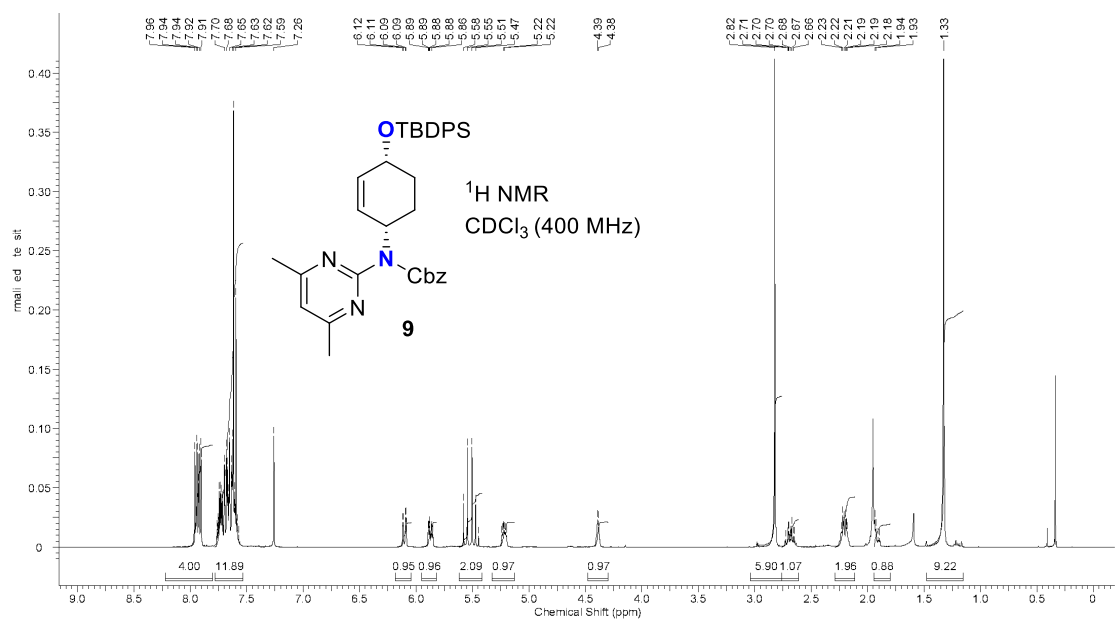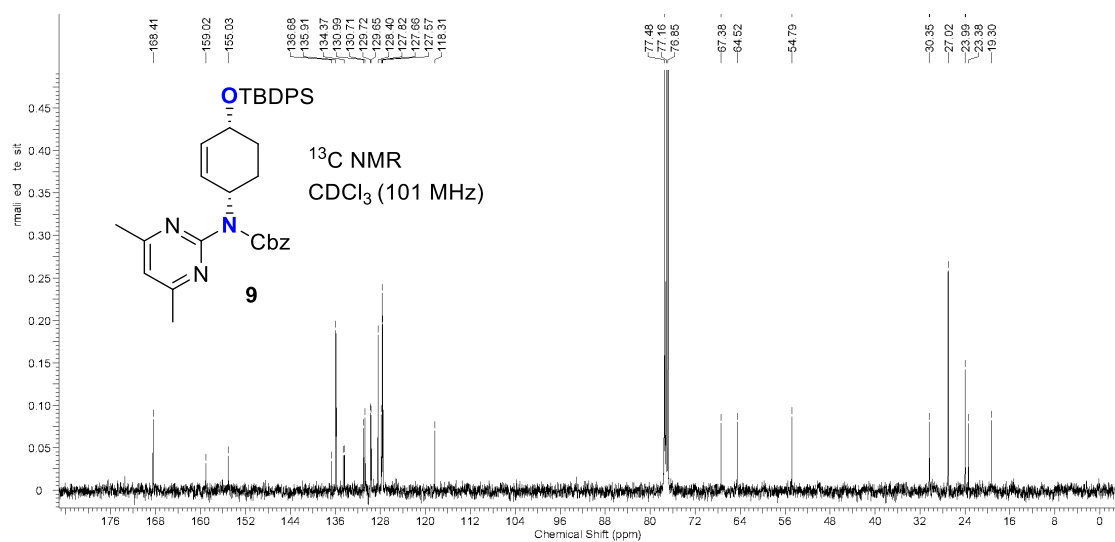



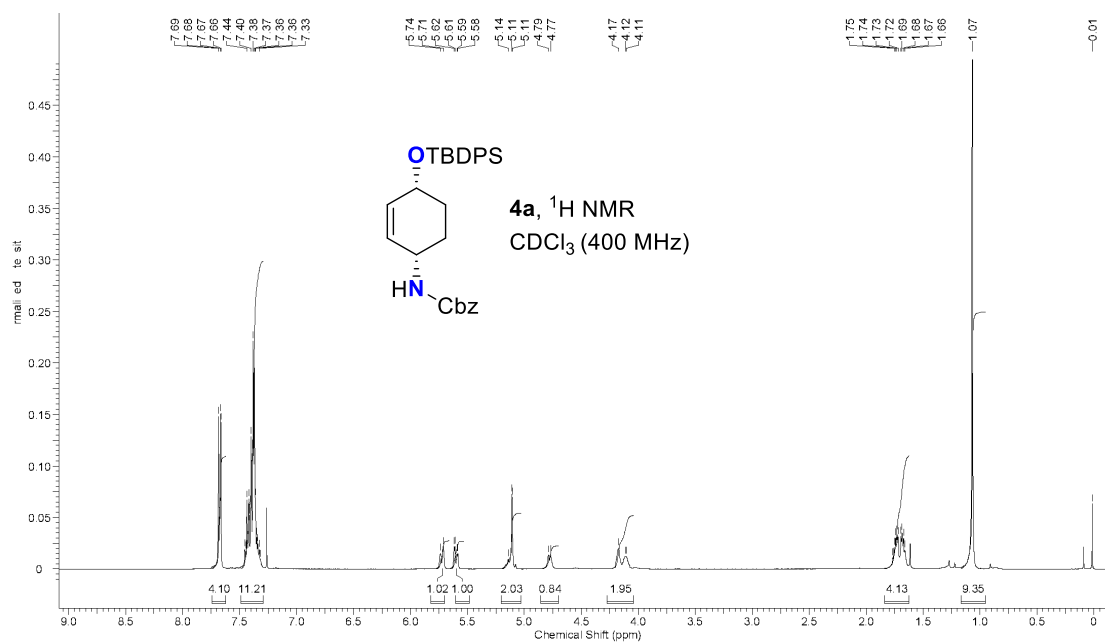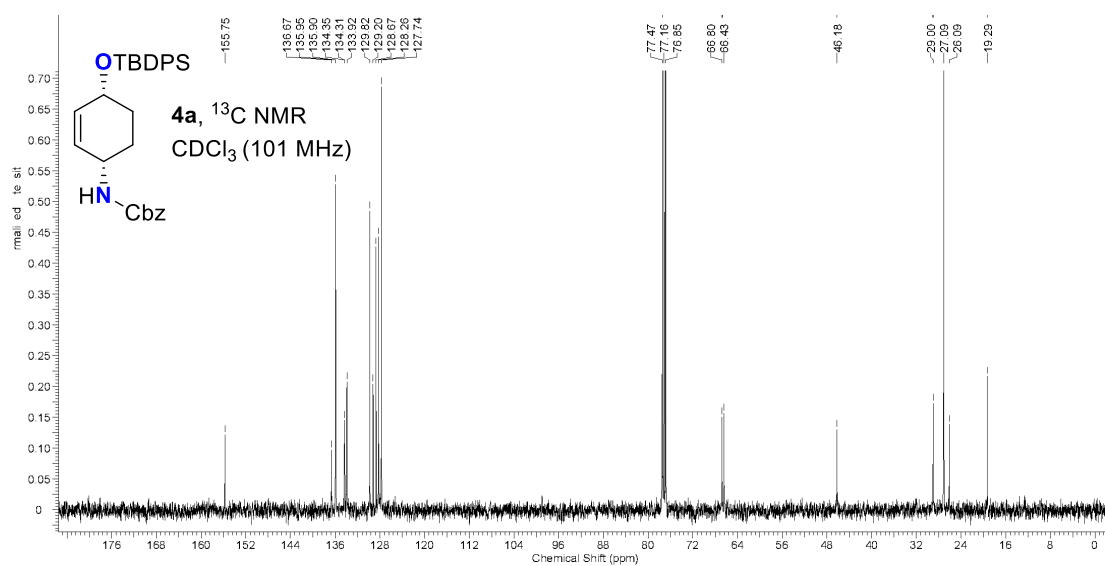

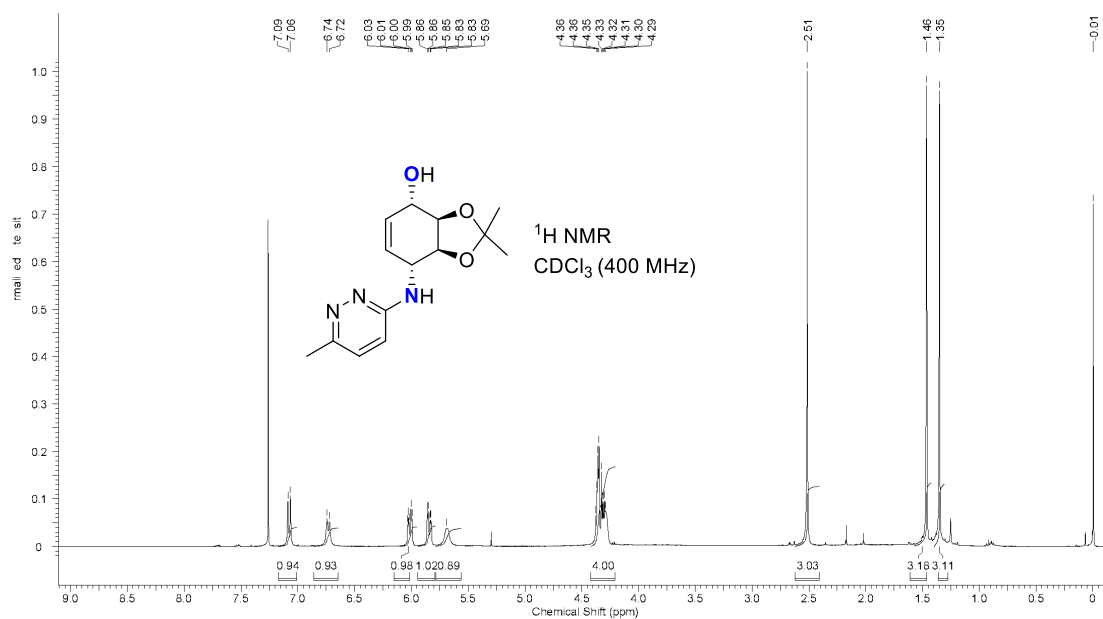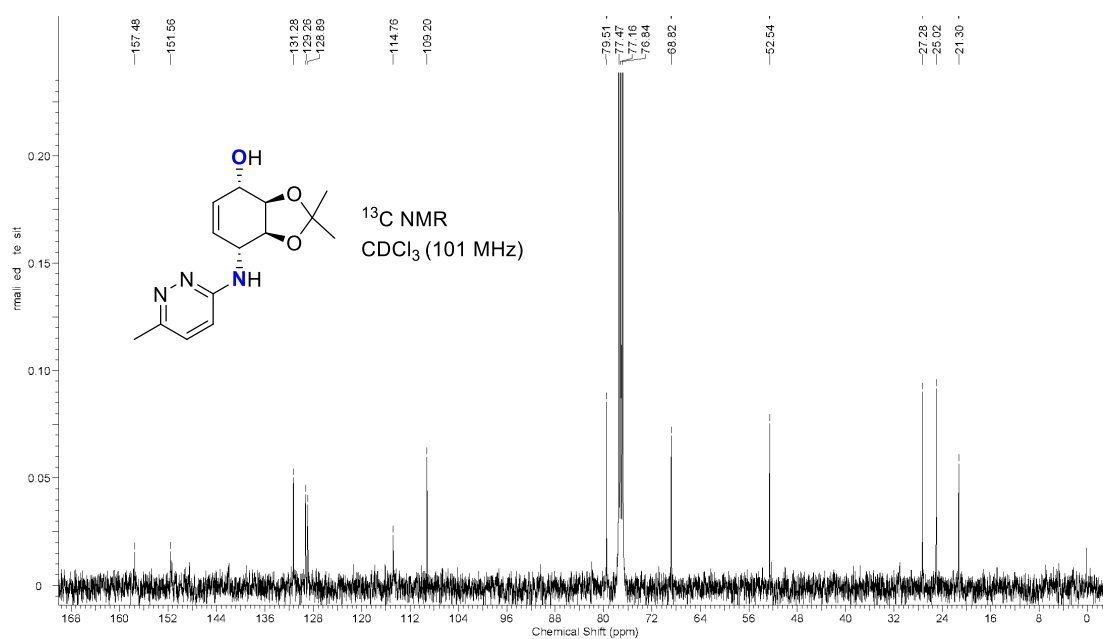

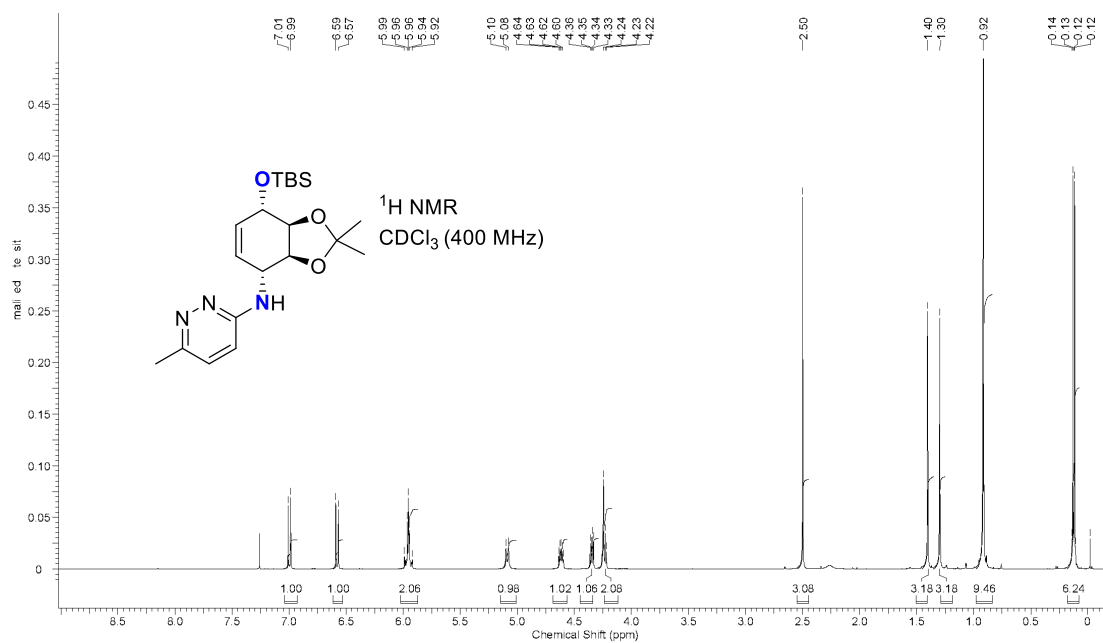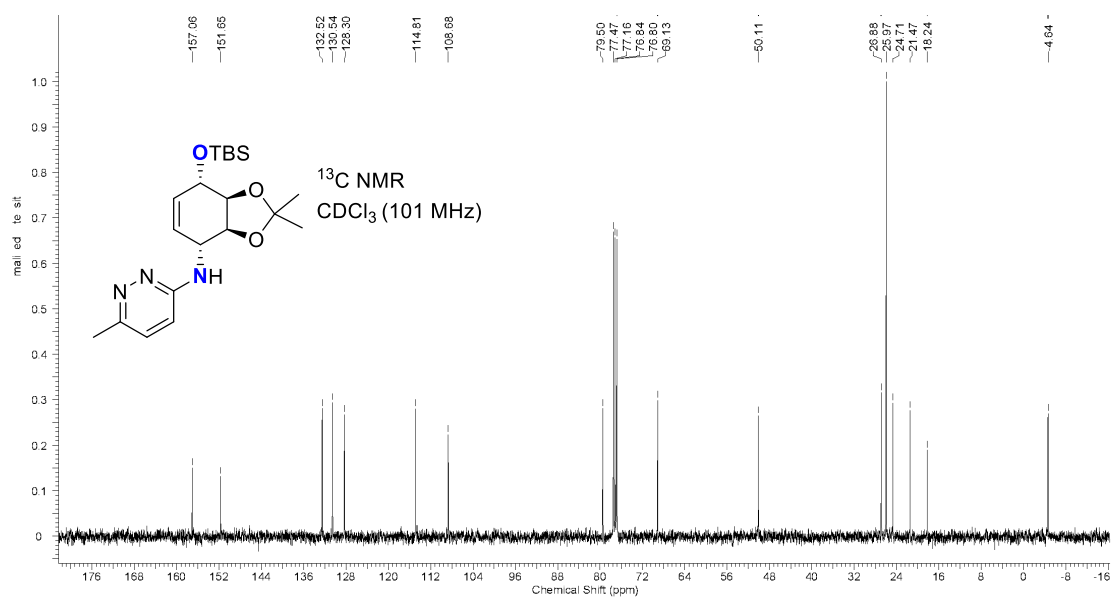

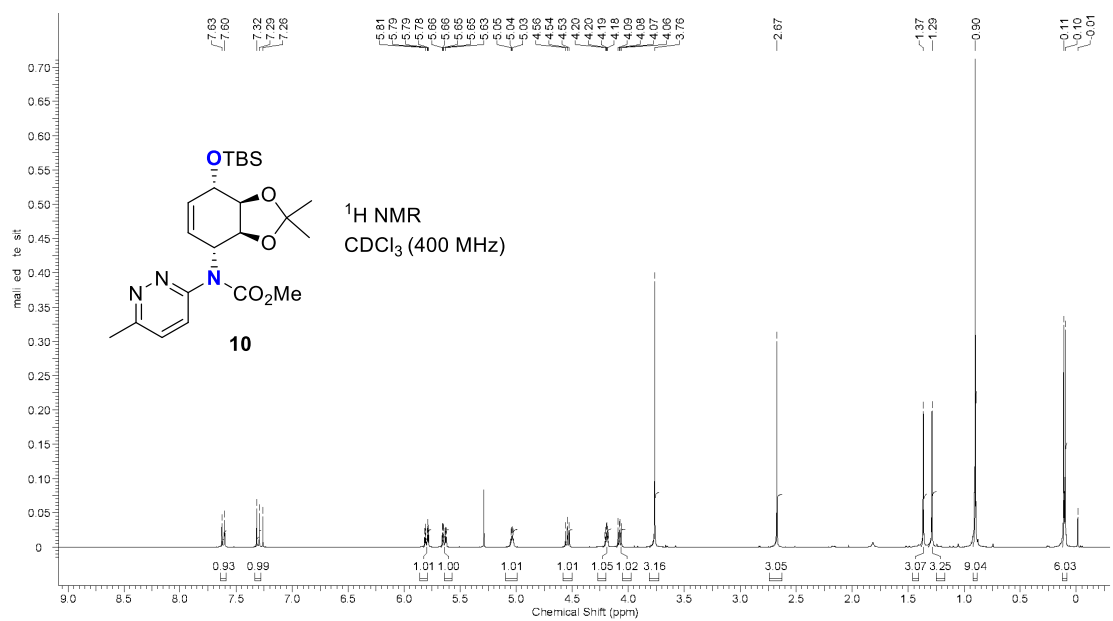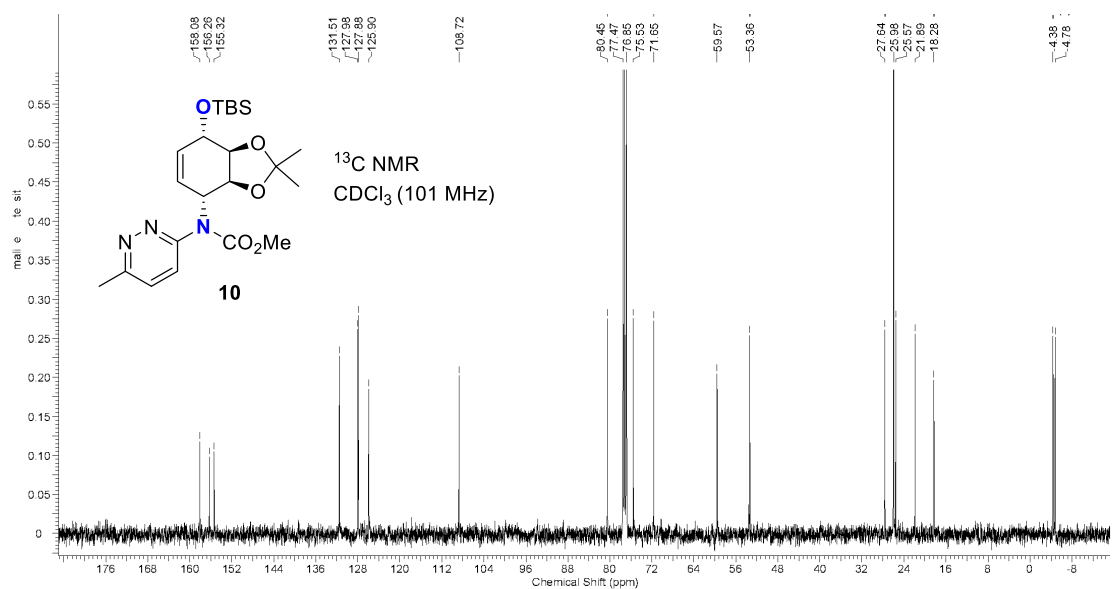

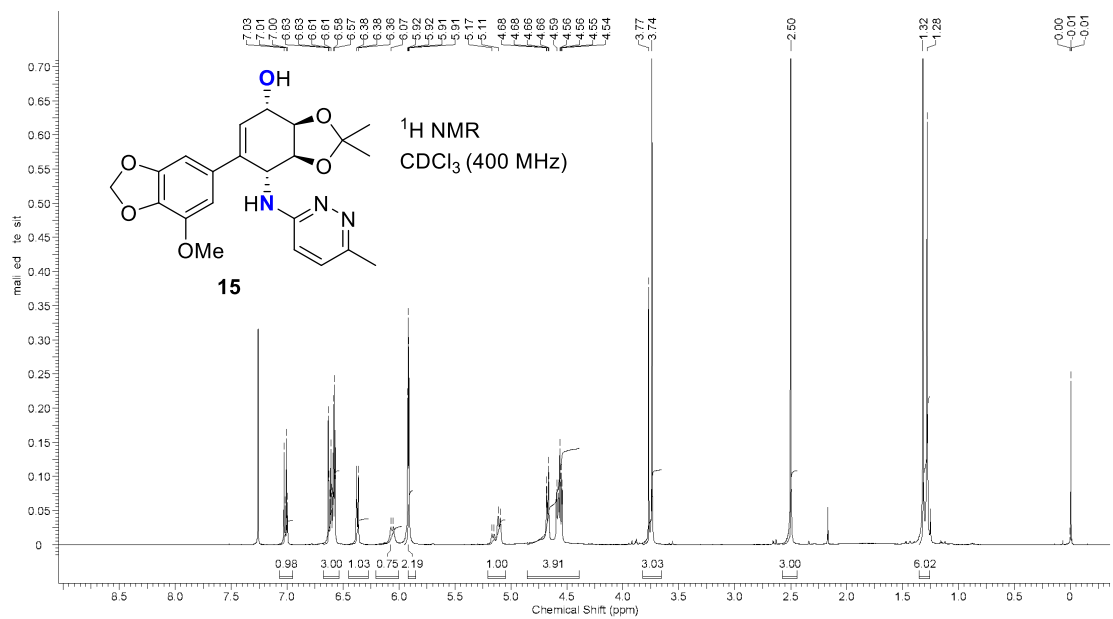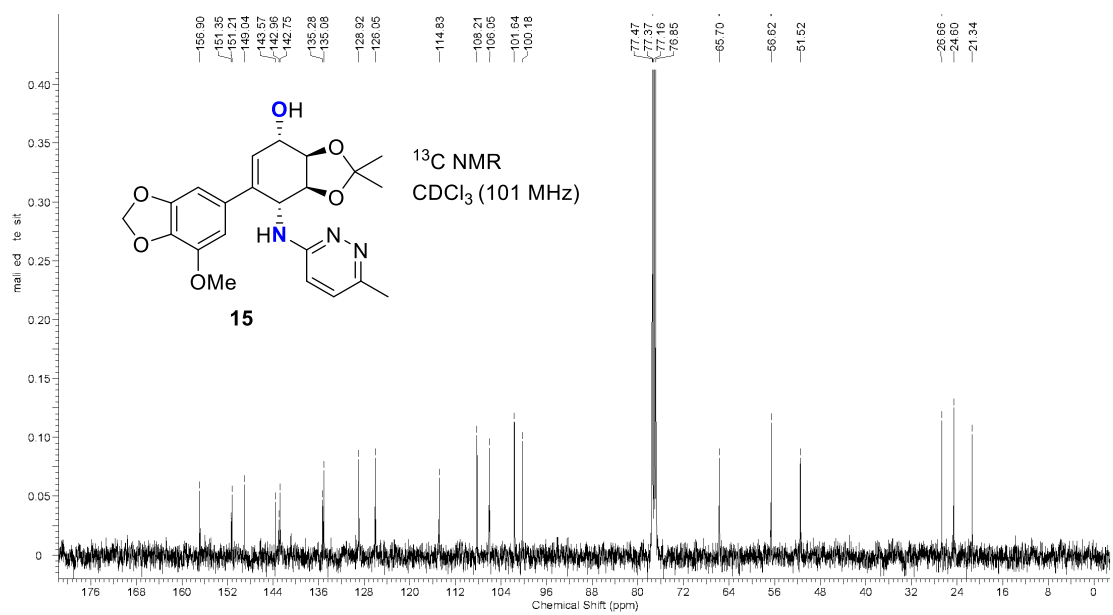

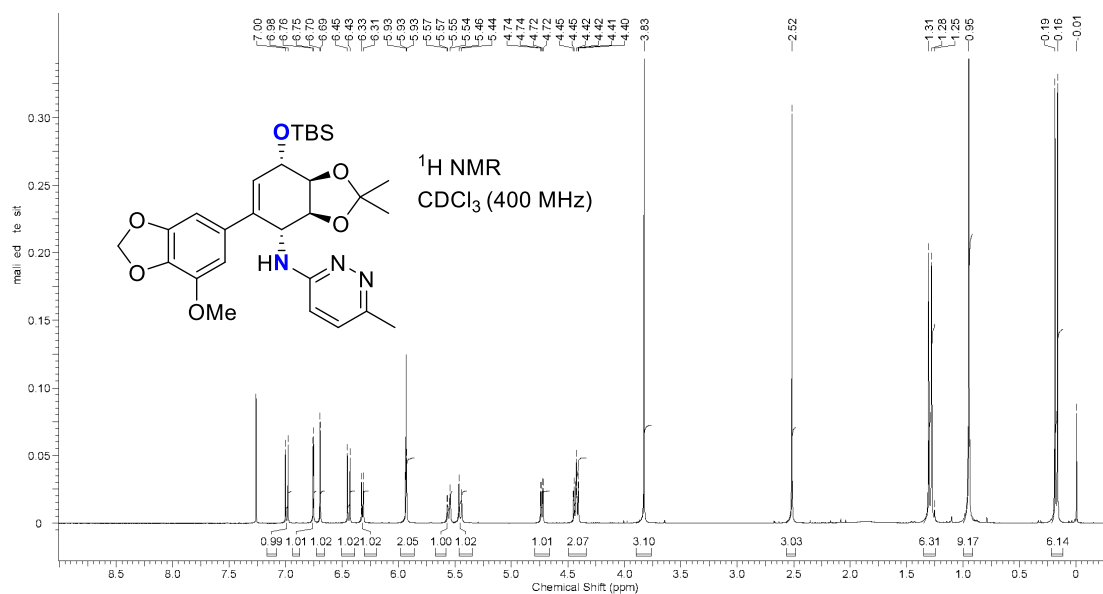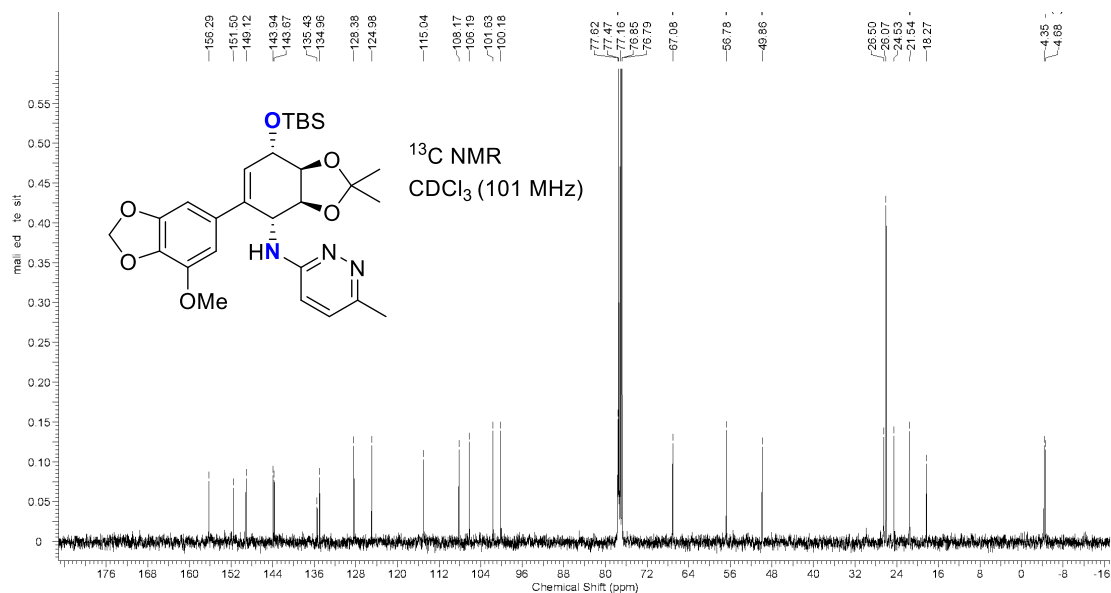

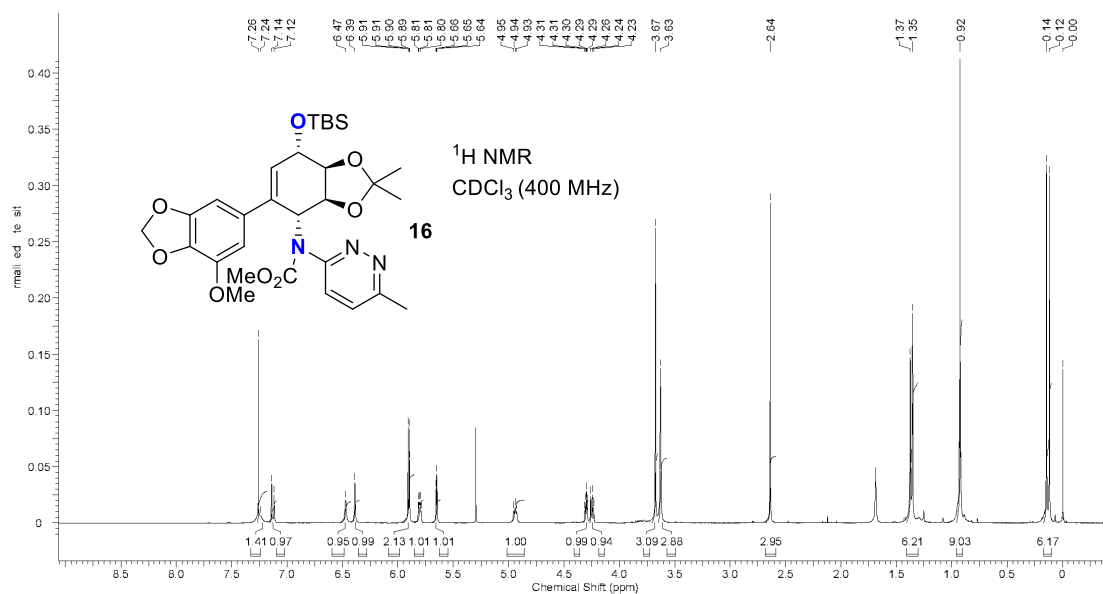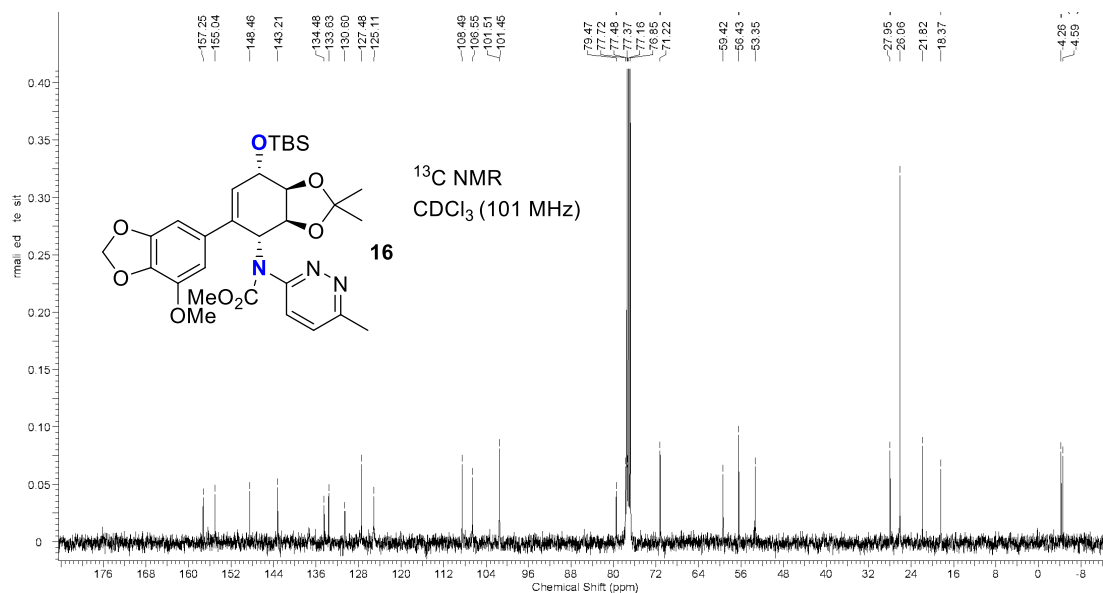

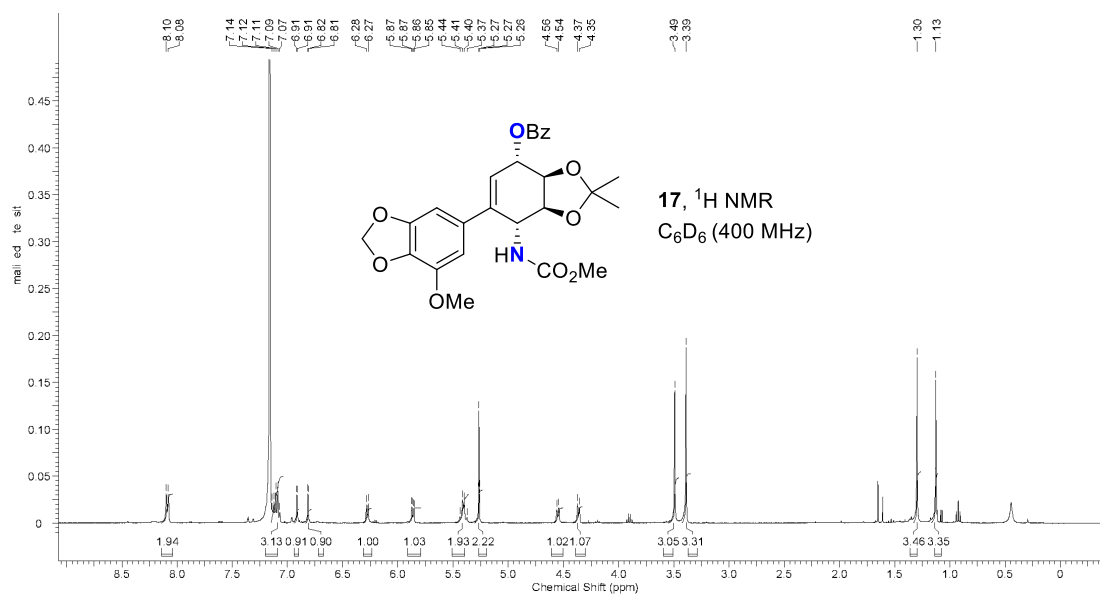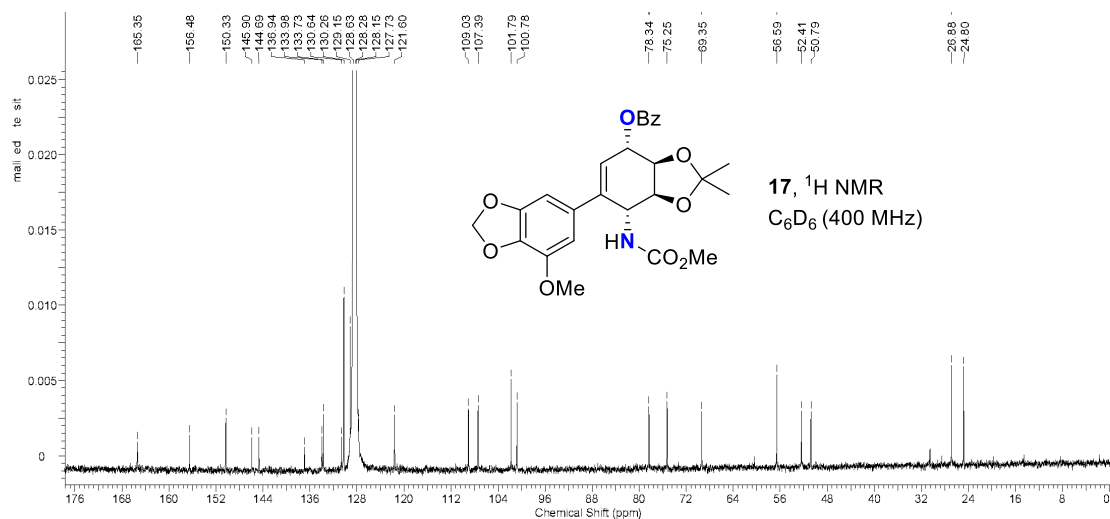



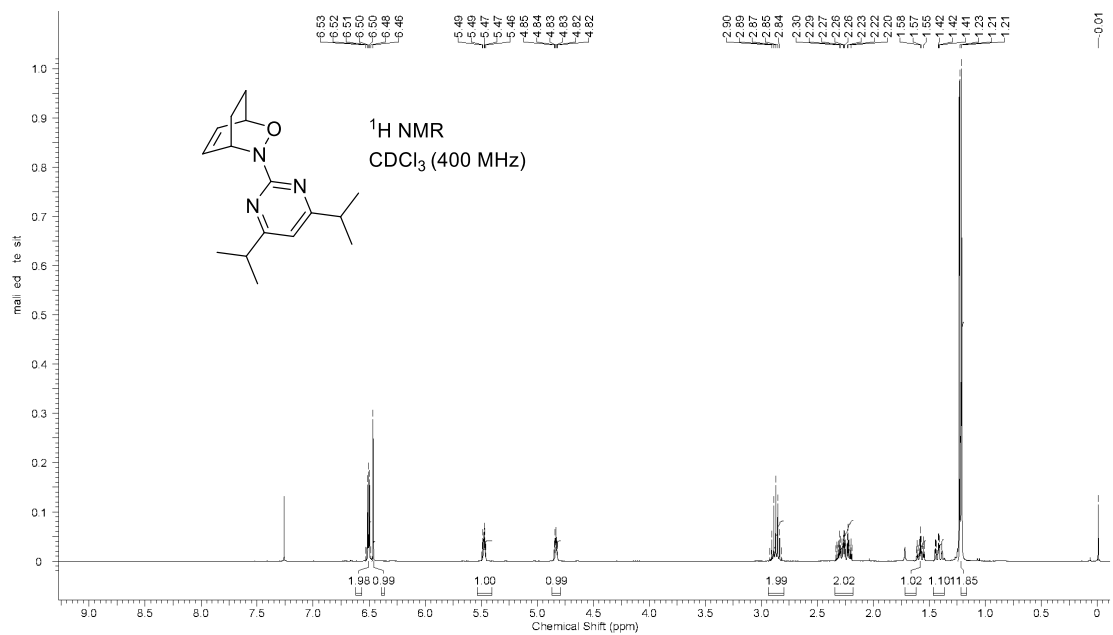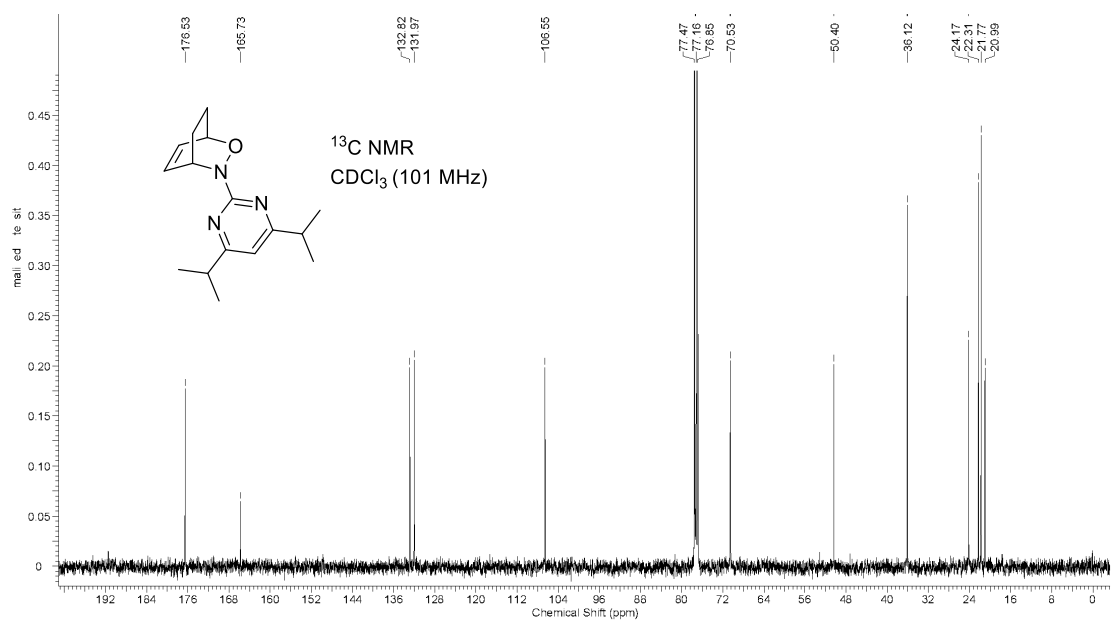

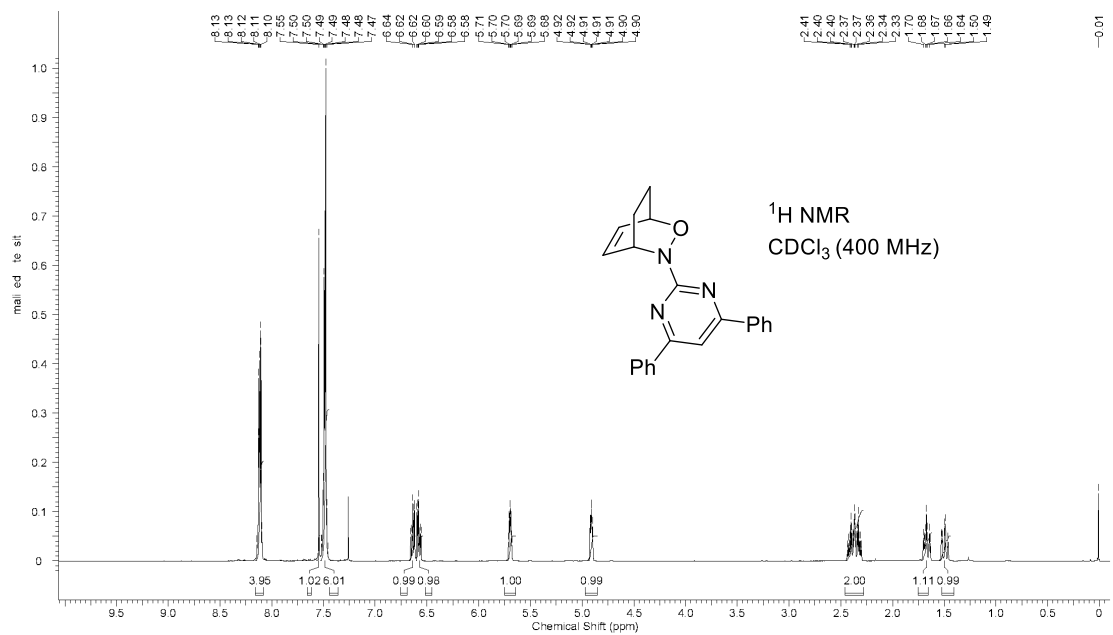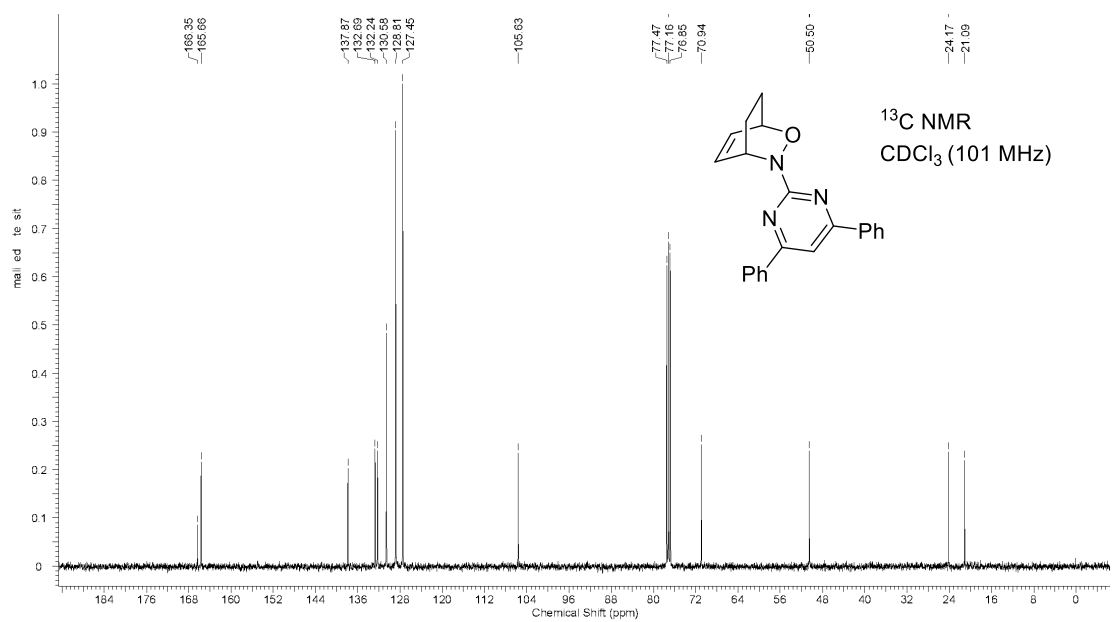

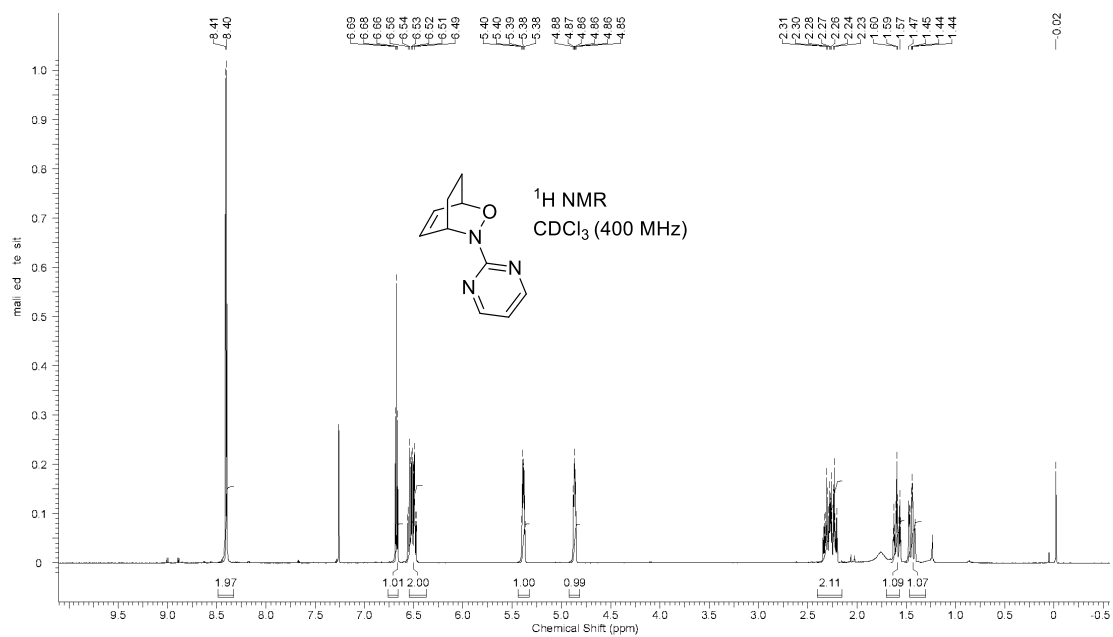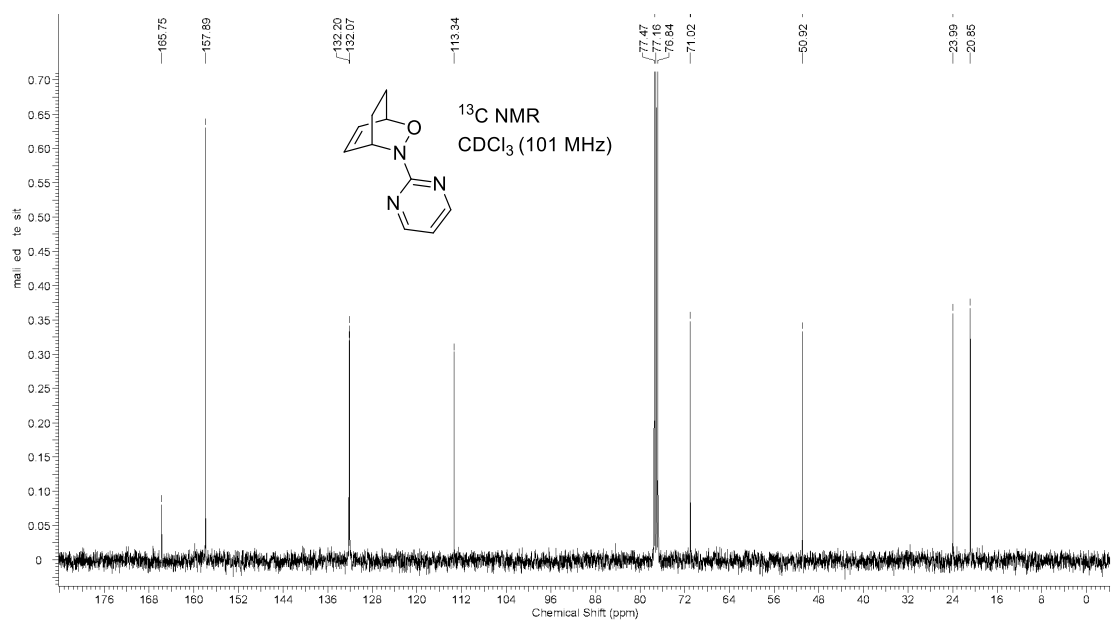

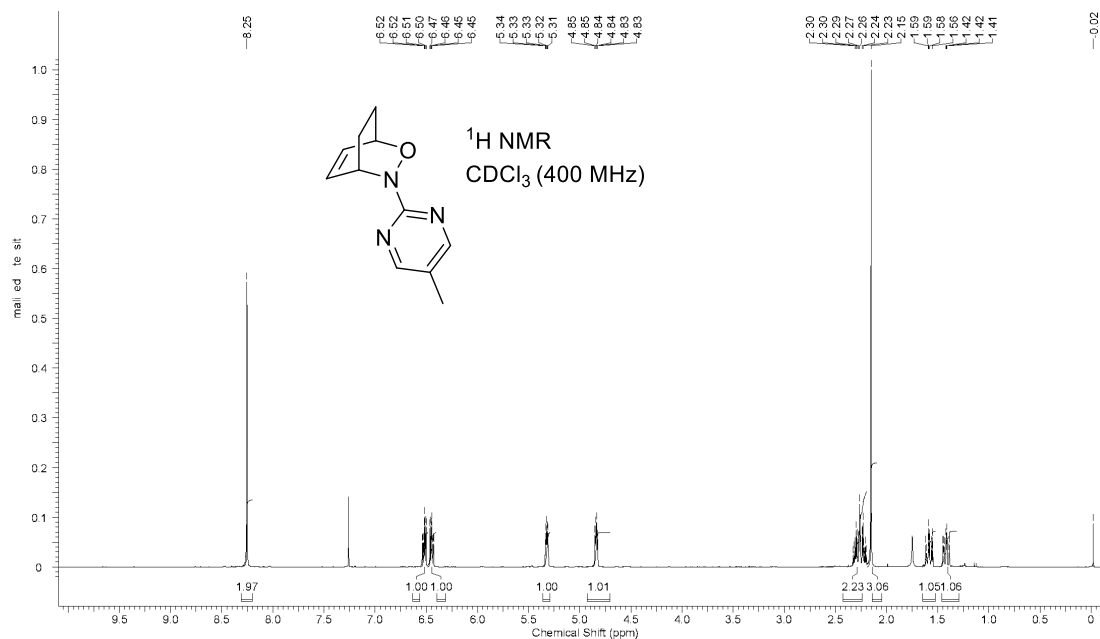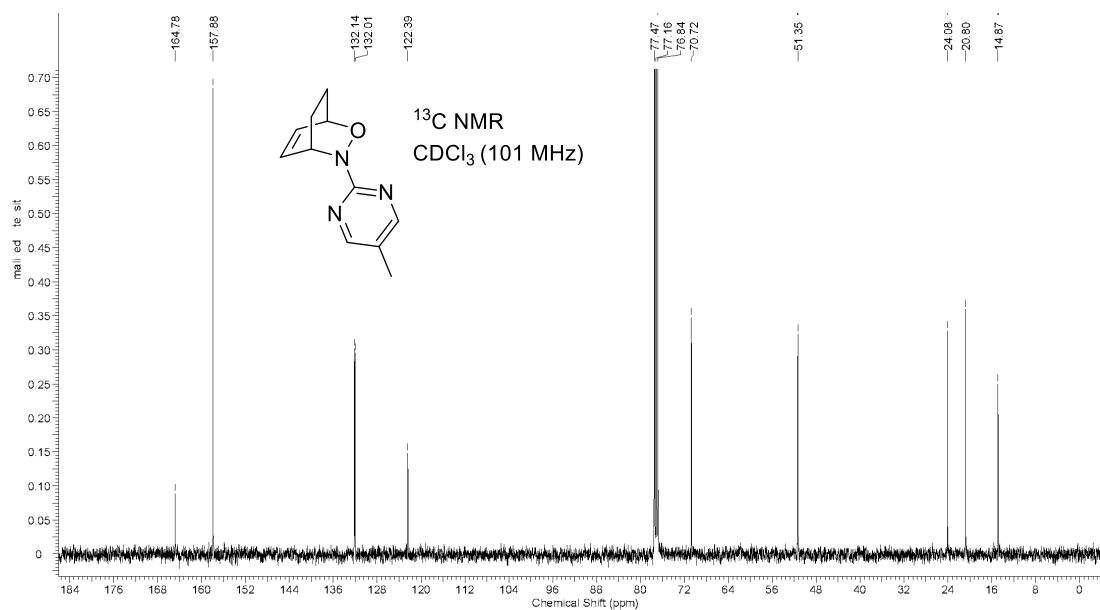

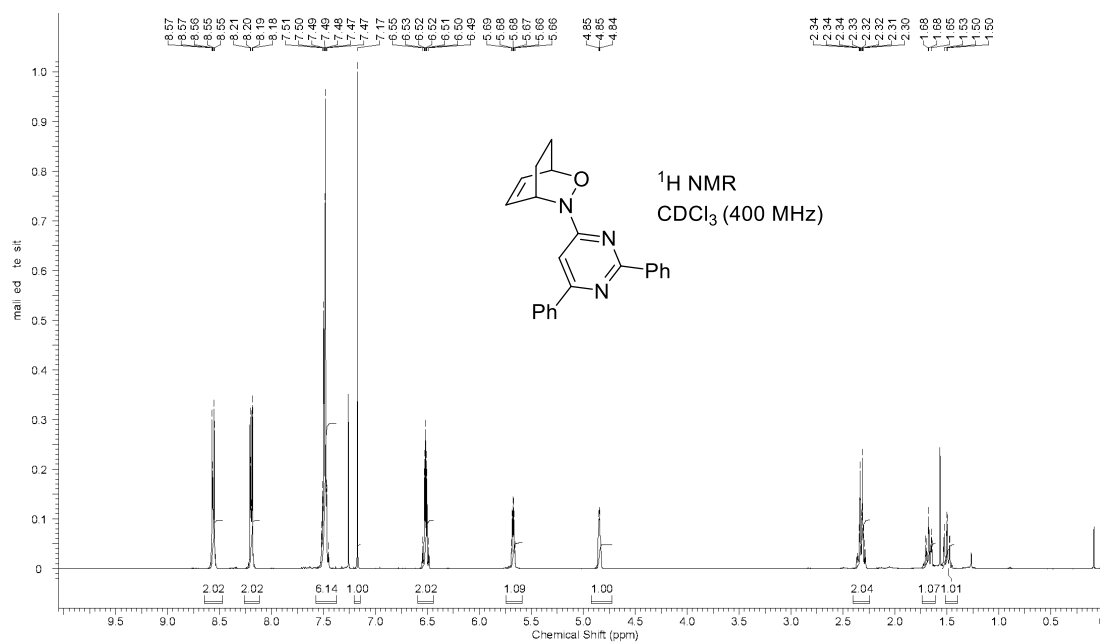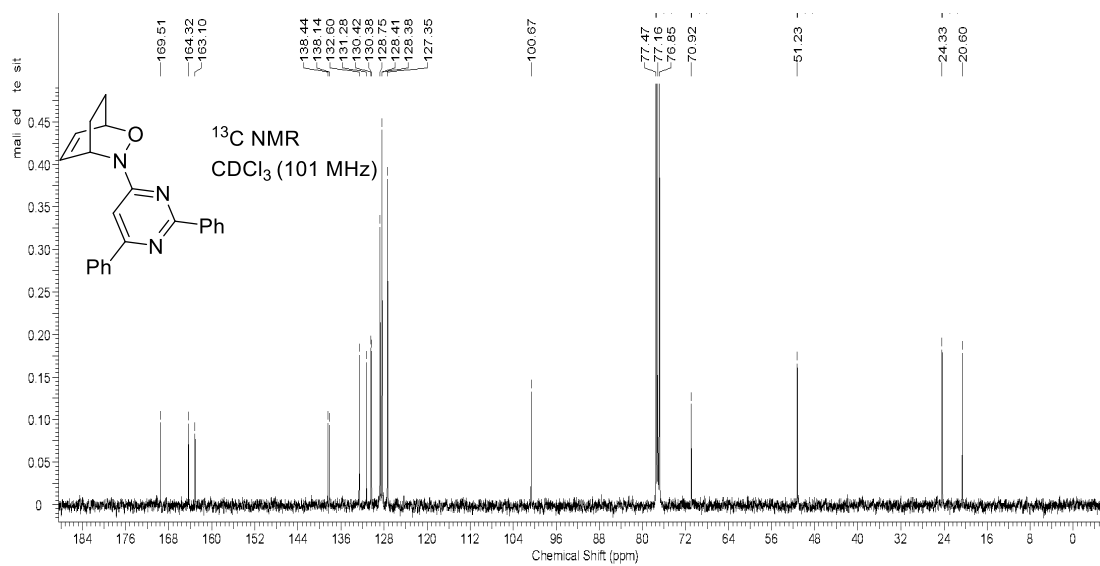

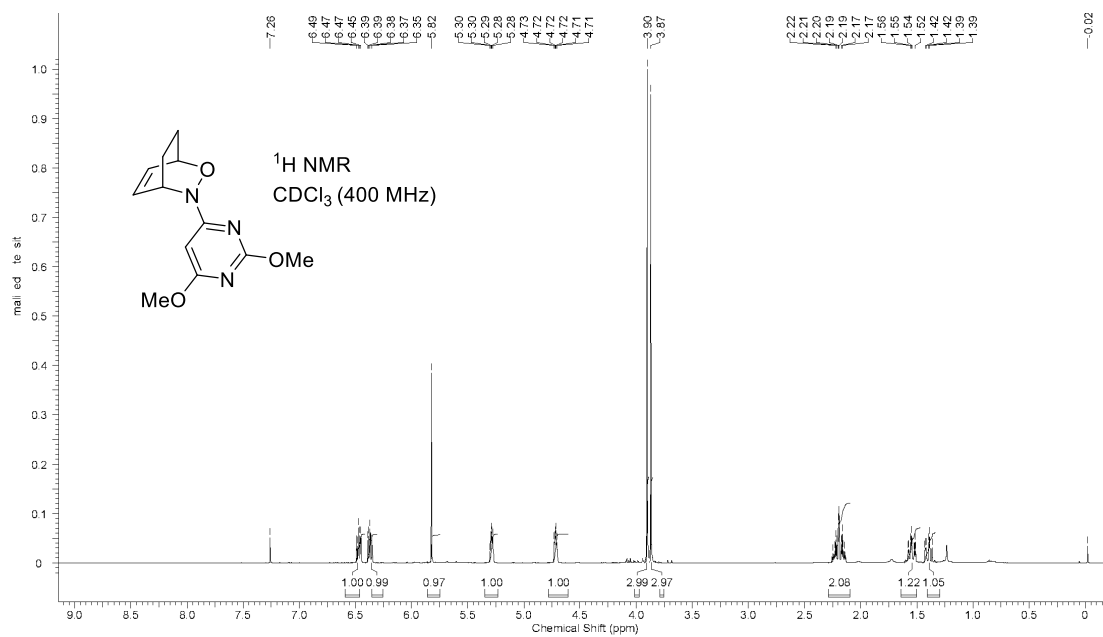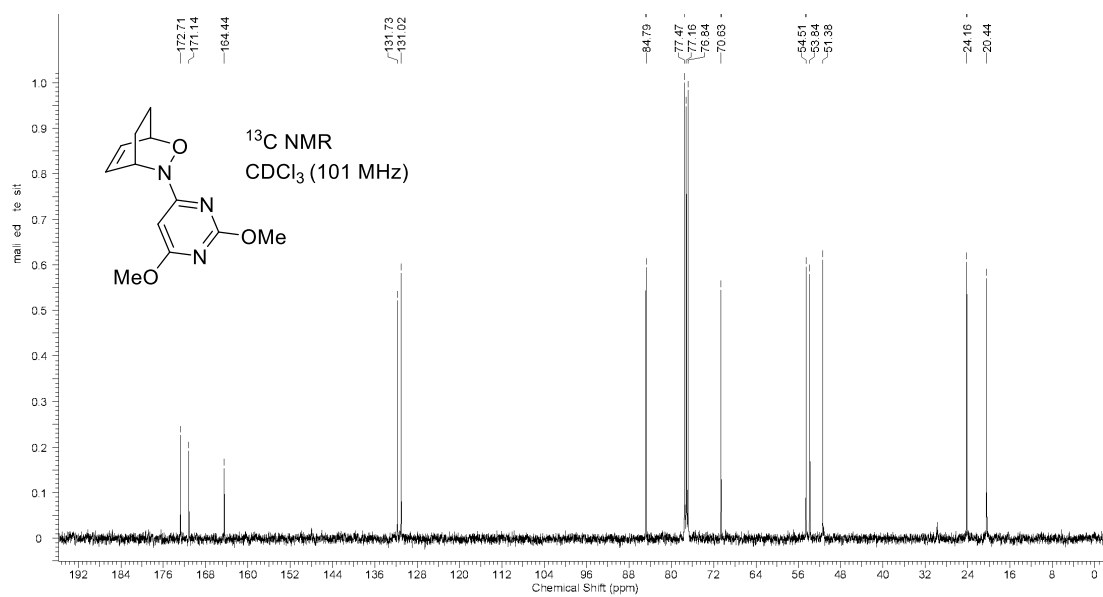

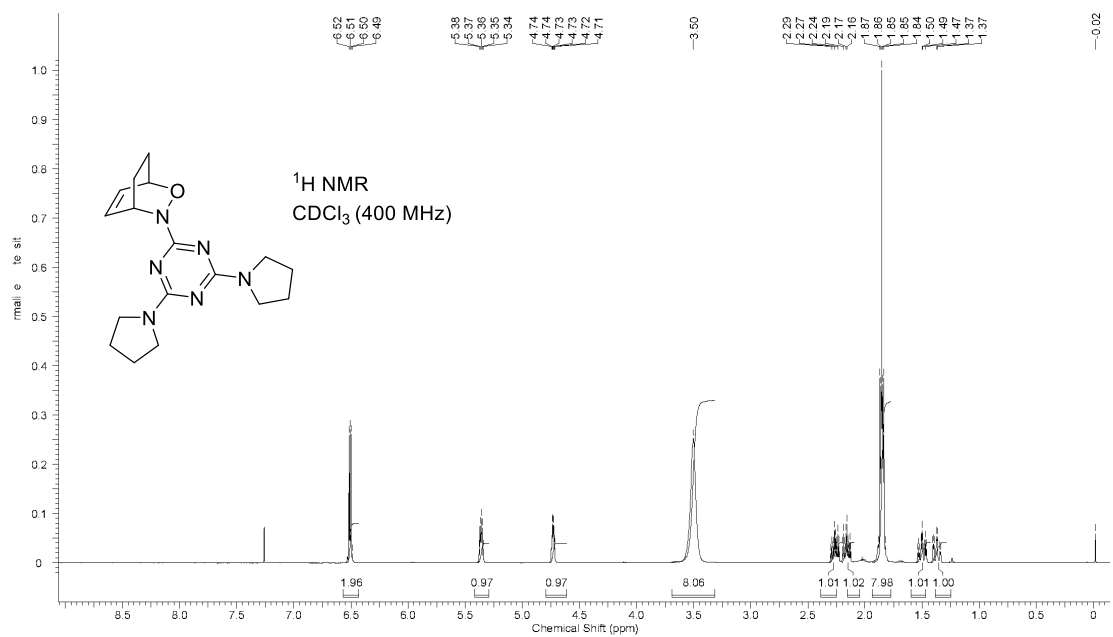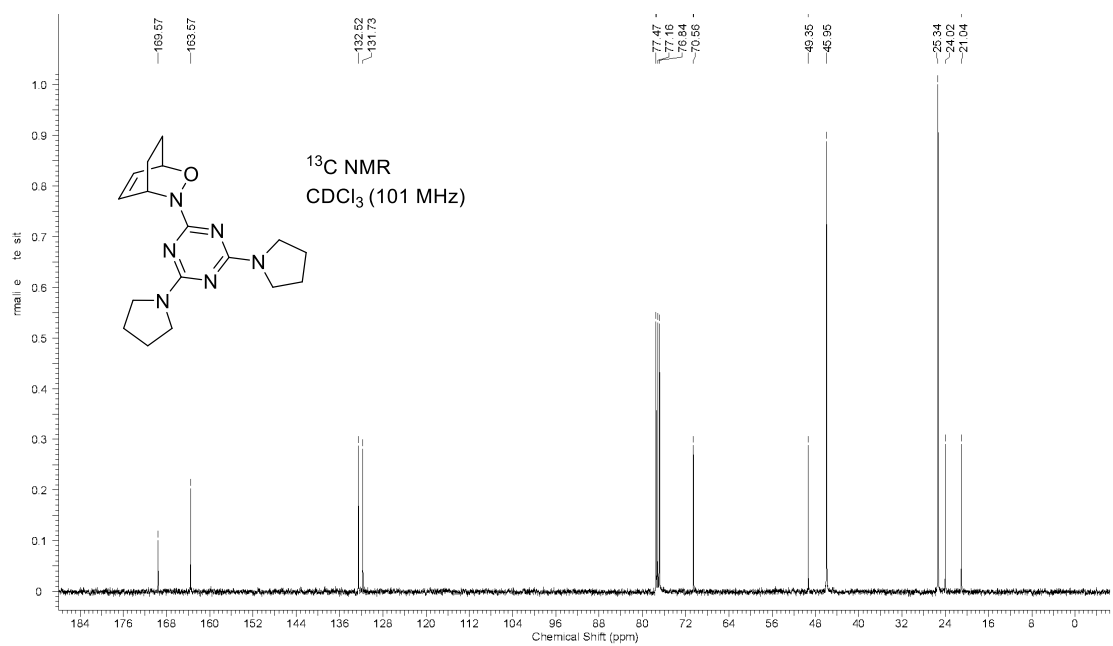

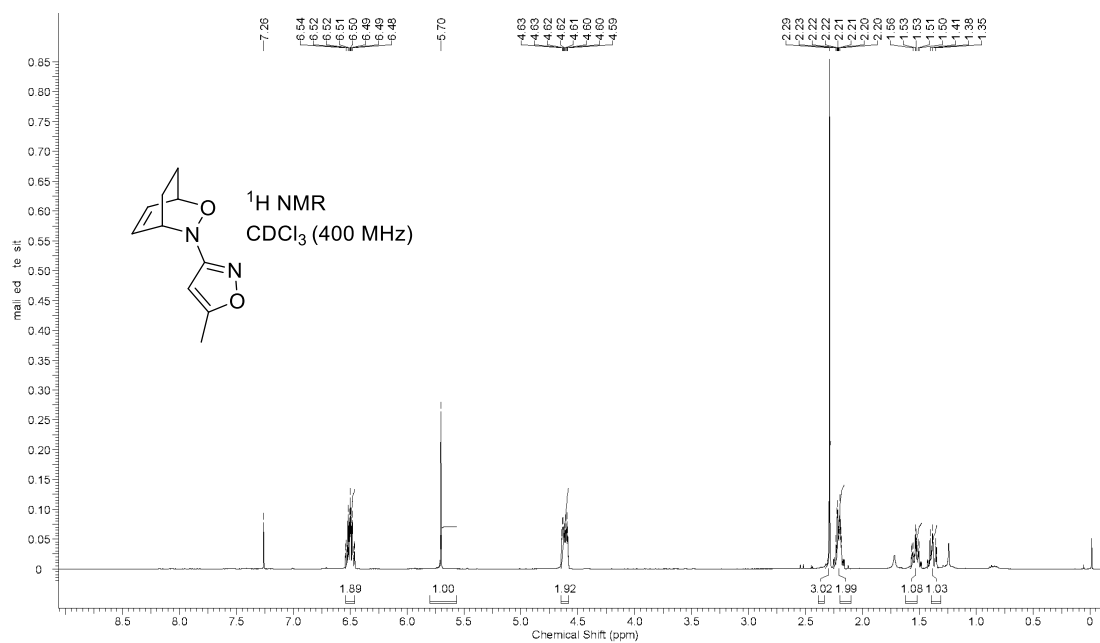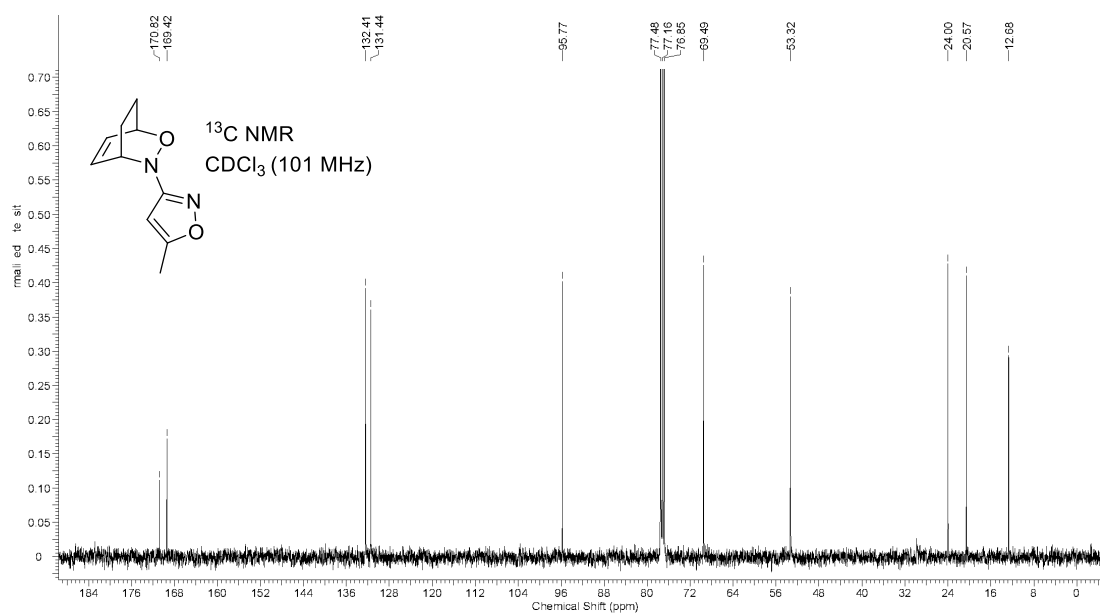



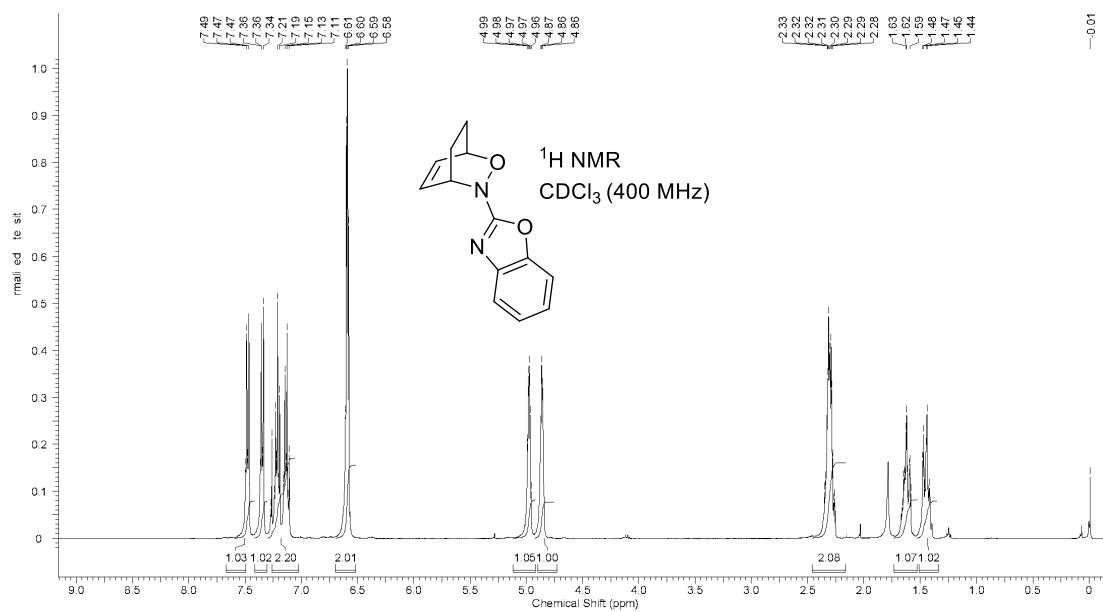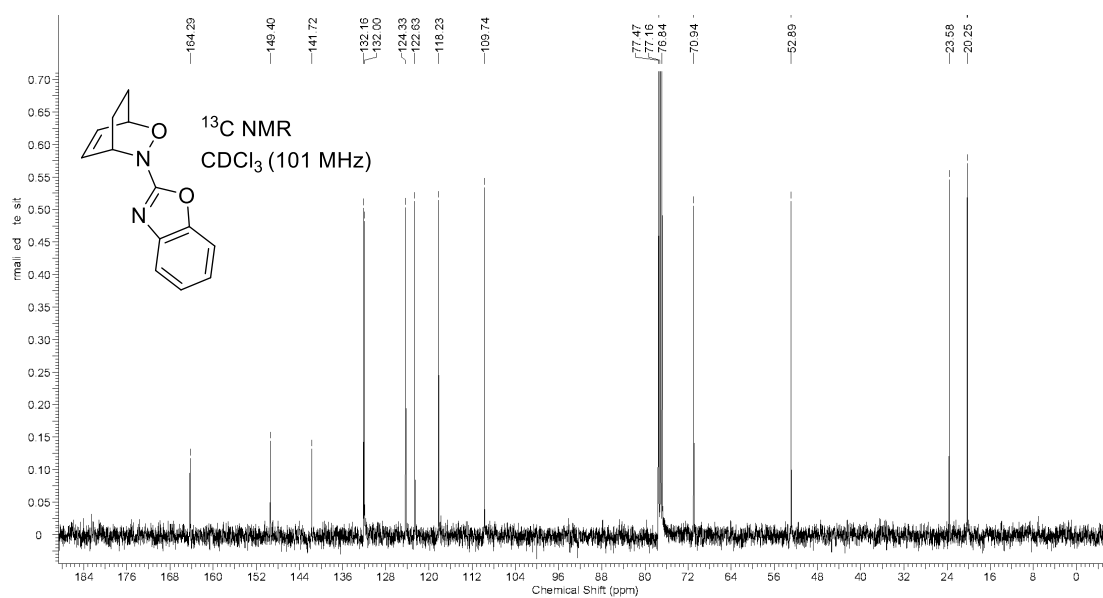

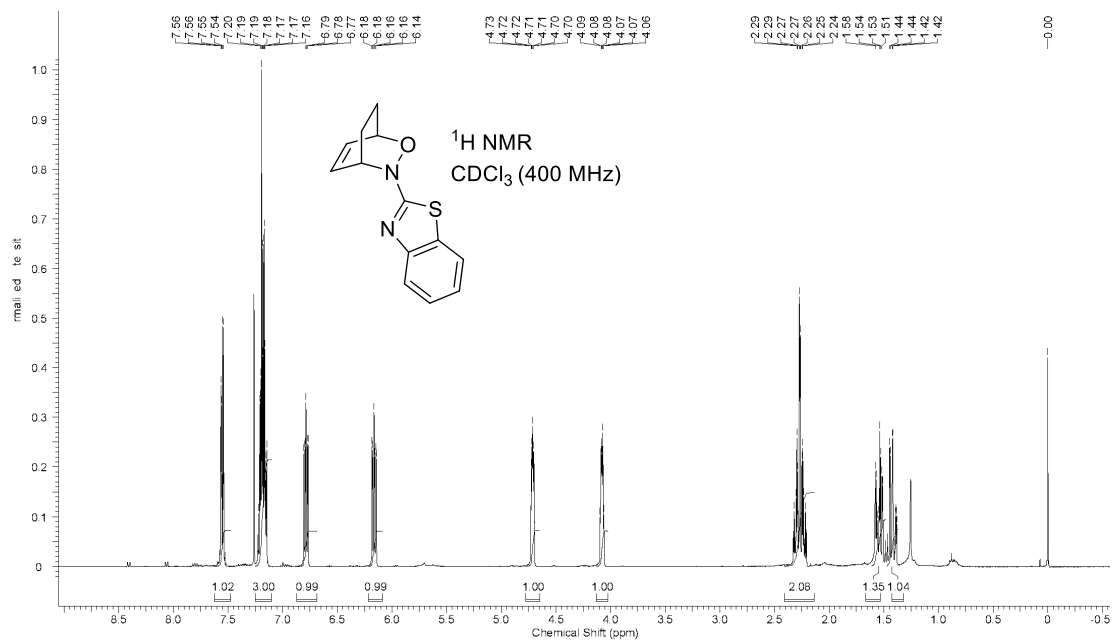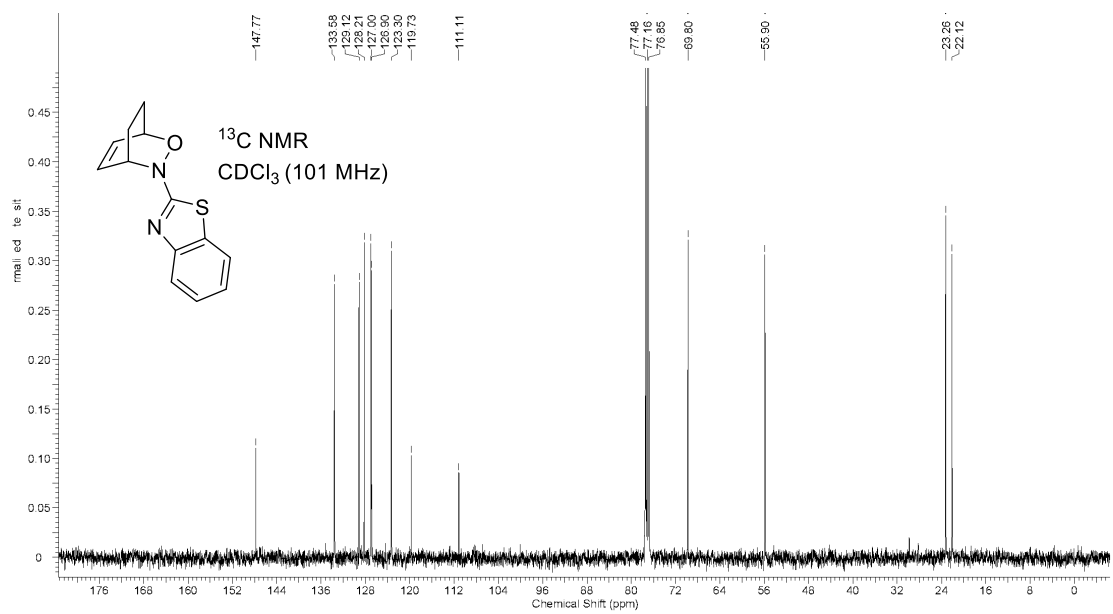

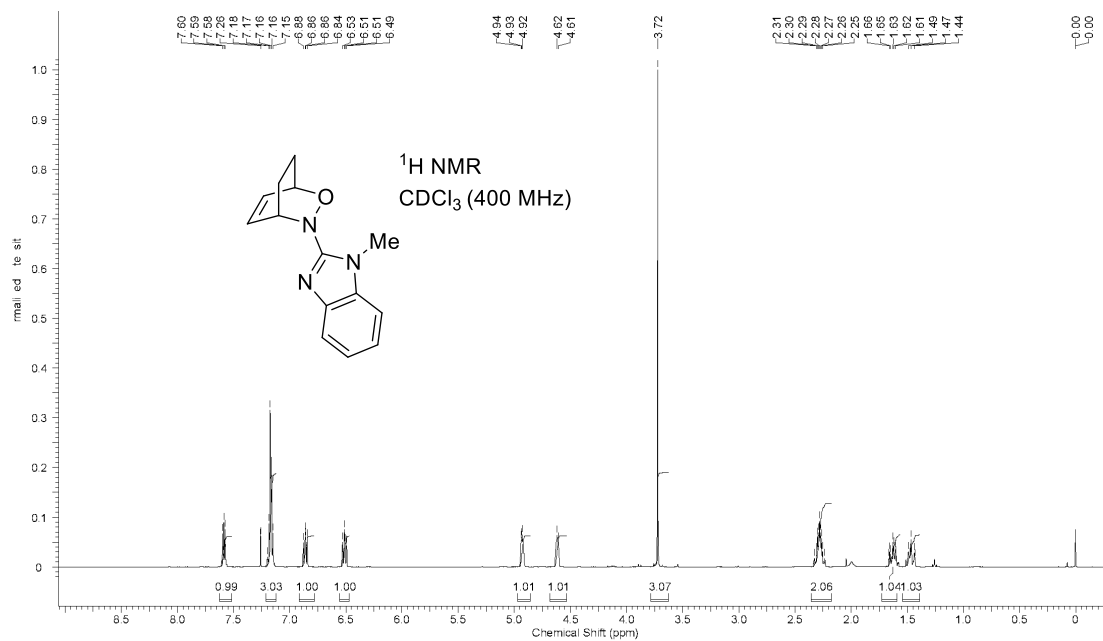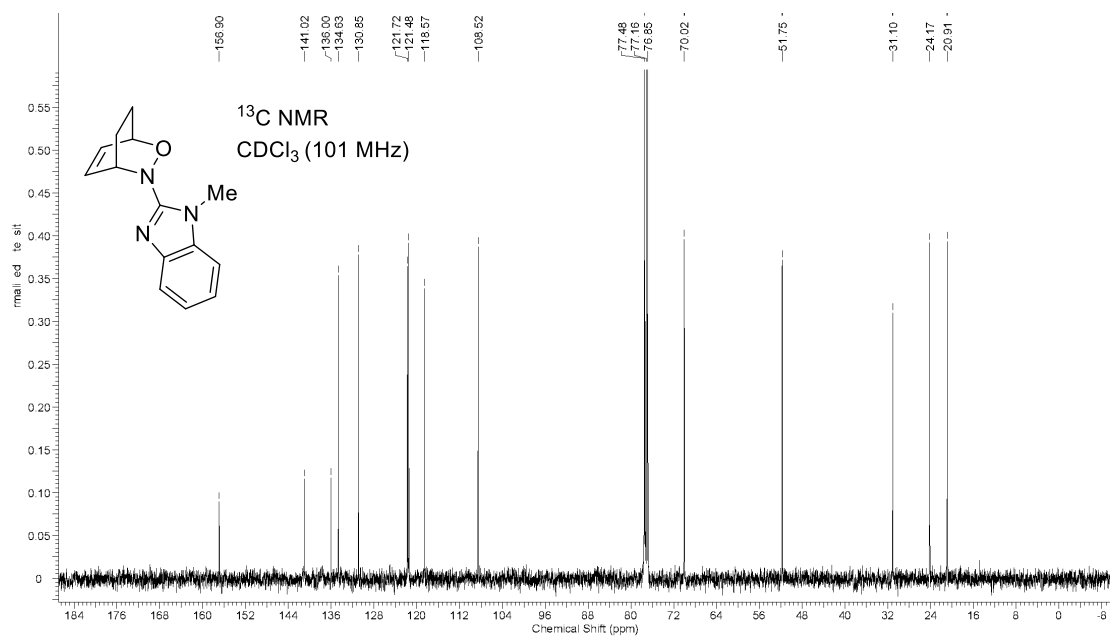

## 17. Copies HPLC chromatogram

### 3ac

Daicel Chiralpak AD-H, hexane/*i*-PrOH = 96/4, flow rate = 1.0 mL/min,  $\lambda$  = 267 nm, retention time;  $t_R$ (minor) = 16.5 min,  $t_R$ (major) = 17.4 min.

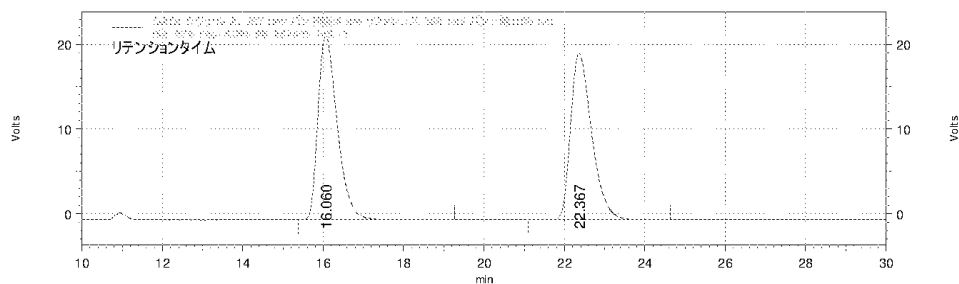

DAD: シグナル A, 267 nm/ バンド幅:4 nm リファレンス  
360 nm/ バンド幅:100 nm 結果  
リテンションタイム

|        | 面積%    |
|--------|--------|
| 16.060 | 50.282 |
| 22.367 | 49.718 |

|    |         |
|----|---------|
| 合計 | 100.000 |
|----|---------|

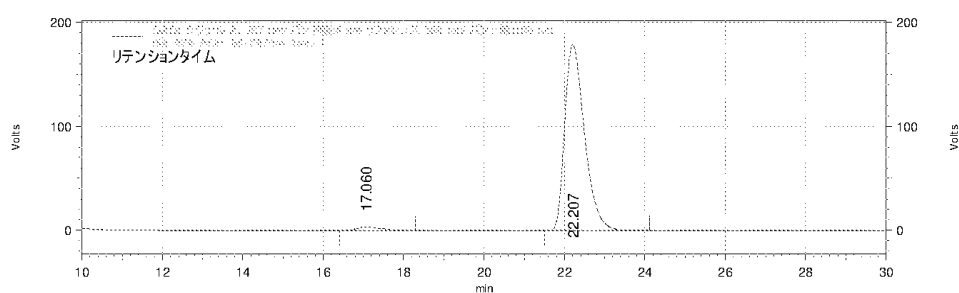

DAD: シグナル A, 267 nm/ バンド幅:4 nm リファレンス  
360 nm/ バンド幅:100 nm 結果  
リテンションタイム

|        | 面積%    |
|--------|--------|
| 17.060 | 2.378  |
| 22.207 | 97.622 |

|    |         |
|----|---------|
| 合計 | 100.000 |
|----|---------|

3aj

Daicel Chiralpak AD-H, hexane/*i*-PrOH = 96/4, flow rate = 1.0 mL/min,  $\lambda$  = 267 nm, retention time;  $t_R$ (major) = 21.8 min,  $t_R$ (minor) = 24.0 min.

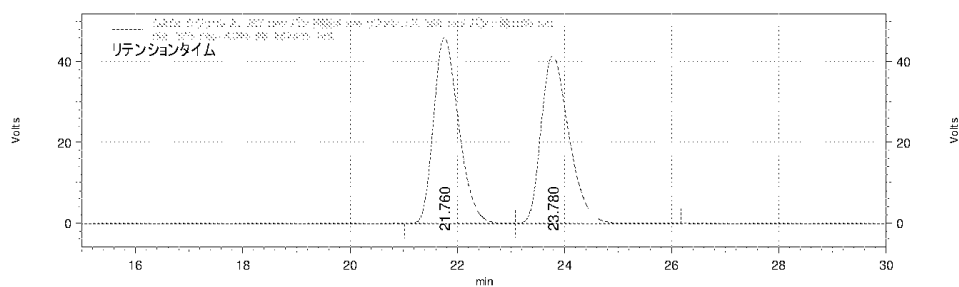

DAD: シグナル A, 267 nm/ バンド幅:4 nm リファレンス  
360 nm/ バンド幅:100 nm 結果  
リテンションタイム

|        | 面積%    |
|--------|--------|
| 21.760 | 49.930 |
| 23.780 | 50.070 |

|    |         |
|----|---------|
| 合計 | 100.000 |
|----|---------|

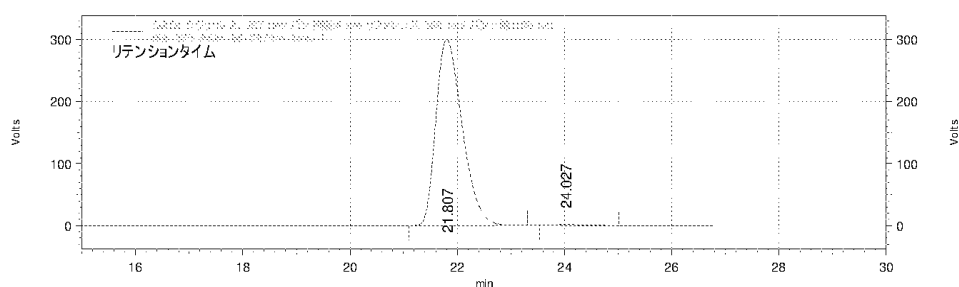

DAD: シグナル A, 267 nm/ バンド幅:4 nm リファレンス  
360 nm/ バンド幅:100 nm 結果  
リテンションタイム

|        | 面積%    |
|--------|--------|
| 21.807 | 99.343 |
| 24.027 | 0.657  |

|    |         |
|----|---------|
| 合計 | 100.000 |
|----|---------|

### 3bc

Daicel Chiralpak AD-H, hexane/*i*-PrOH = 96/4, flow rate = 1.0 mL/min,  $\lambda$  = 267 nm, retention time;  $t_R$ (minor) = 17.1 min,  $t_R$ (major) = 22.2 min.

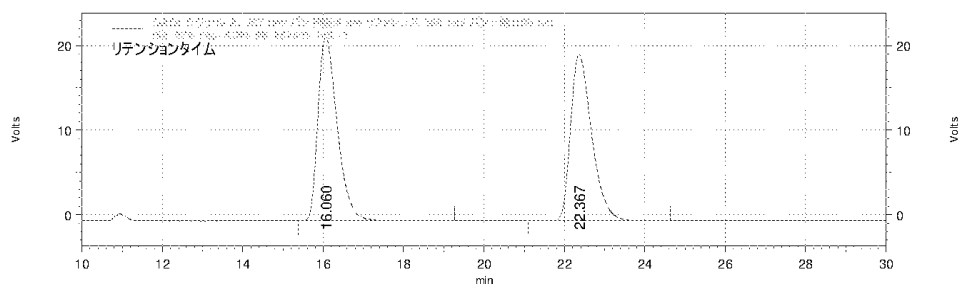

DAD: シグナル A, 267 nm/ バンド幅:4 nm リファレンス  
360 nm/ バンド幅:100 nm 結果  
リテンションタイム

|        | 面積%    |
|--------|--------|
| 16.060 | 50.282 |
| 22.367 | 49.718 |

|    |         |
|----|---------|
| 合計 | 100.000 |
|----|---------|

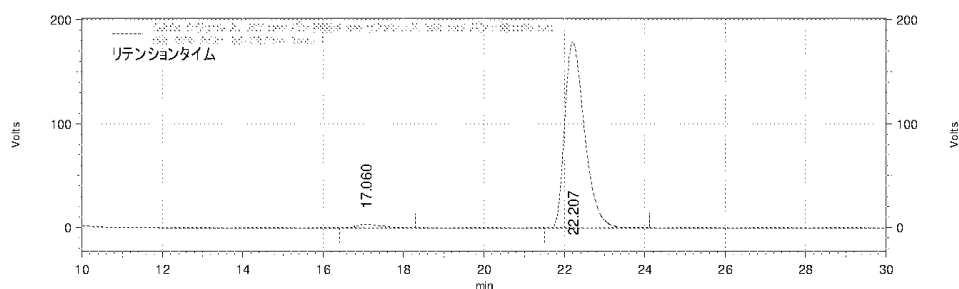

DAD: シグナル A, 267 nm/ バンド幅:4 nm リファレンス  
360 nm/ バンド幅:100 nm 結果  
リテンションタイム

|        | 面積%    |
|--------|--------|
| 17.060 | 2.378  |
| 22.207 | 97.622 |

|    |         |
|----|---------|
| 合計 | 100.000 |
|----|---------|

**3bj**

Daicel Chiralpak AD-H, hexane/*i*-PrOH = 97/3, flow rate = 1.0 mL/min,  $\lambda$  = 267 nm, retention time;  $t_R$ (major) = 26.7 min,  $t_R$ (minor) = 30.3 min.

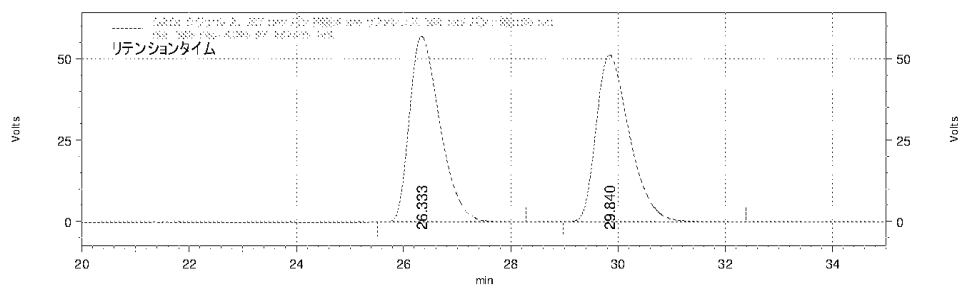

DAD: シグナル A, 267 nm/ バンド幅:4 nm リファレンス  
360 nm/ バンド幅:100 nm 結果  
リテンションタイム

|        | 面積%    |
|--------|--------|
| 26.333 | 50.531 |
| 29.840 | 49.469 |

|    |         |
|----|---------|
| 合計 | 100.000 |
|----|---------|

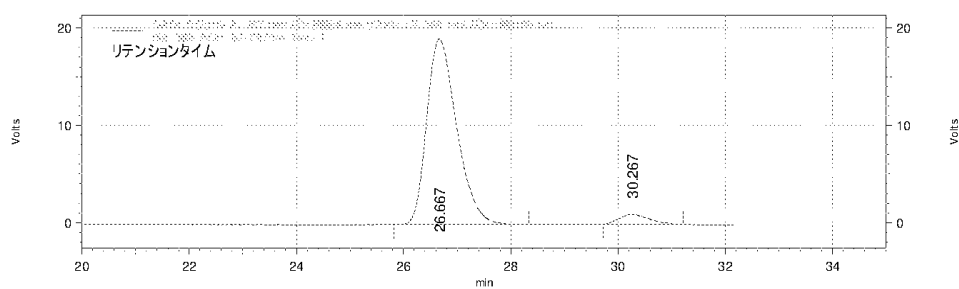

DAD: シグナル A, 267 nm/ バンド幅:4 nm リファレンス  
360 nm/ バンド幅:100 nm 結果  
リテンションタイム

|        | 面積%    |
|--------|--------|
| 26.667 | 94.965 |
| 30.267 | 5.035  |

|    |         |
|----|---------|
| 合計 | 100.000 |
|----|---------|

3cc

Daicel Chiralpak AD-H, hexane/*i*-PrOH = 96/4, flow rate = 1.0 mL/min,  $\lambda$  = 267 nm, retention time;  $t_R$ (minor) = 12.2 min,  $t_R$ (major) = 16.4 min.

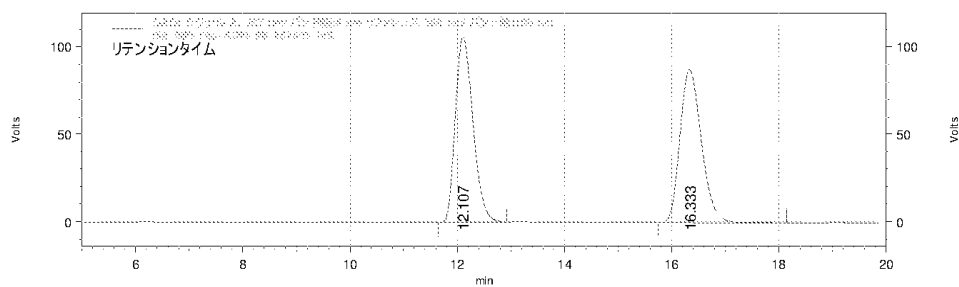

DAD: シグナル A, 267 nm/ バンド幅:4 nm リファレンス  
360 nm/ バンド幅:100 nm 結果  
リテンションタイム

|        | 面積%    |
|--------|--------|
| 12.107 | 49.887 |
| 16.333 | 50.113 |

|    |         |
|----|---------|
| 合計 | 100.000 |
|----|---------|

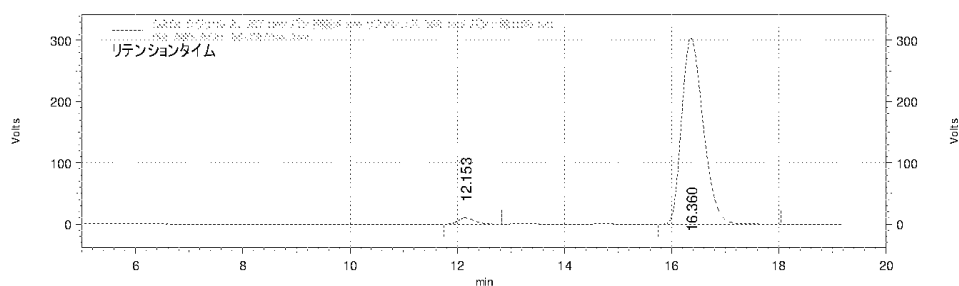

DAD: シグナル A, 267 nm/ バンド幅:4 nm リファレンス  
360 nm/ バンド幅:100 nm 結果  
リテンションタイム

|        | 面積%    |
|--------|--------|
| 12.153 | 2.550  |
| 16.360 | 97.450 |

|    |         |
|----|---------|
| 合計 | 100.000 |
|----|---------|



**3cj**

Daicel Chiralpak IB-3, hexane/*i*-PrOH = 96/4, flow rate = 1.0 mL/min,  $\lambda$  = 254 nm, retention time;  $t_R$ (major) = 29.7 min,  $t_R$ (minor) = 39.1 min.

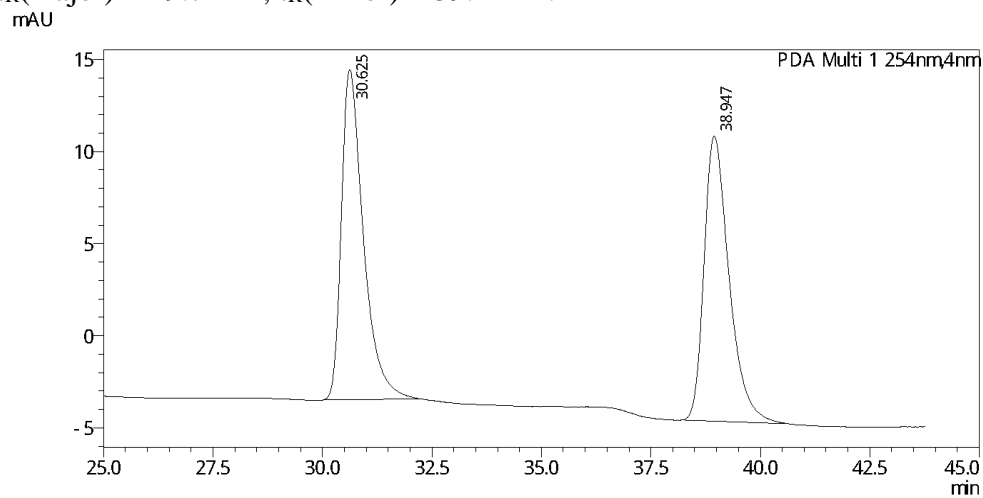

<ピークレポート>

PDA Ch1 254nm

| ピーク#  | 保持時間   | 高さ    | 面積%     |
|-------|--------|-------|---------|
| 1     | 30.625 | 17910 | 50.433  |
| 2     | 38.947 | 15472 | 49.567  |
| Total |        | 33382 | 100.000 |

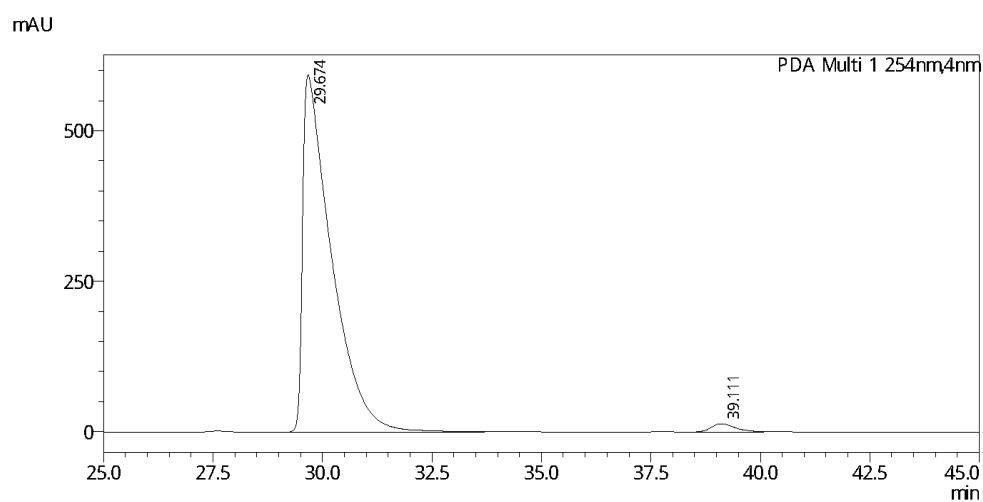

PDA Ch1 254nm

| ピーク#  | 保持時間   | 面積       | 高さ     | 面積%     |
|-------|--------|----------|--------|---------|
| 1     | 29.674 | 27212735 | 593773 | 98.064  |
| 2     | 39.111 | 537315   | 13746  | 1.936   |
| Total |        | 27750050 | 607519 | 100.000 |

### 3dc

Daicel Chiralpak AD-H, hexane/*i*-PrOH = 96/4, flow rate = 1.0 mL/min,  $\lambda$  = 267 nm, retention time;  $t_{R(\text{minor})}$  = 7.5 min,  $t_{R(\text{major})}$  = 10.2 min.

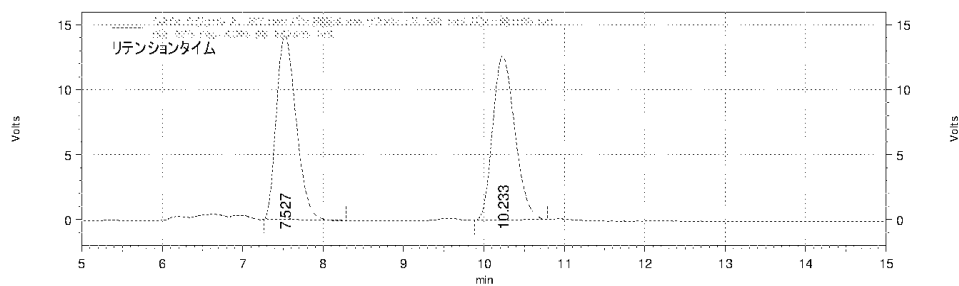

DAD: シグナル A, 267 nm/ バンド幅:4 nm リファレンス  
360 nm/ バンド幅:100 nm 結果  
リテンションタイム

|        | 面積%    |
|--------|--------|
| 7.527  | 49.949 |
| 10.233 | 50.051 |

|    |         |
|----|---------|
| 合計 | 100.000 |
|----|---------|

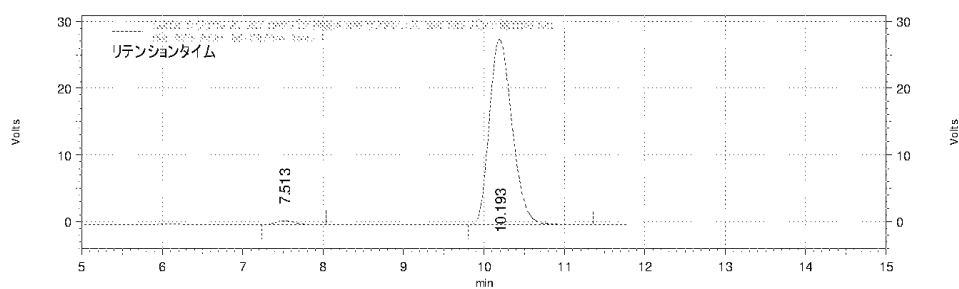

DAD: シグナル A, 267 nm/ バンド幅:4 nm リファレンス  
360 nm/ バンド幅:100 nm 結果  
リテンションタイム

|        | 面積%    |
|--------|--------|
| 7.513  | 1.991  |
| 10.193 | 98.009 |

|    |         |
|----|---------|
| 合計 | 100.000 |
|----|---------|

3dj

Daicel Chiralpak IB-3, hexane/*i*-PrOH = 96/4, flow rate = 1.0 mL/min,  $\lambda$  = 254 nm, retention time;  $t_R$ (major) = 26.4 min,  $t_R$ (minor) = 28.9 min.

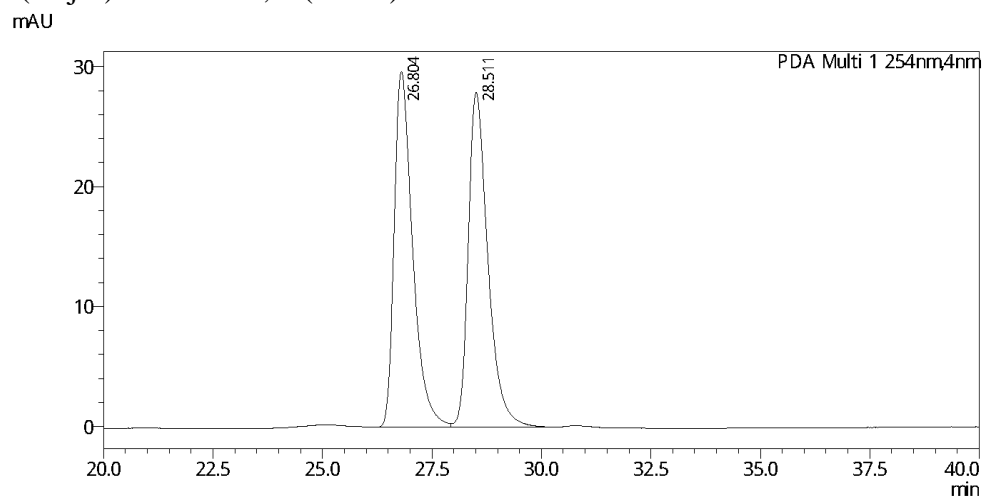

<ピークレポート>

PDA Ch1 254nm

| ピーク#  | 保持時間   | 面積      | 高さ    | 面積%     |
|-------|--------|---------|-------|---------|
| 1     | 26.804 | 872611  | 29693 | 49.965  |
| 2     | 28.511 | 873831  | 27942 | 50.035  |
| Total |        | 1746442 | 57635 | 100.000 |

mAU

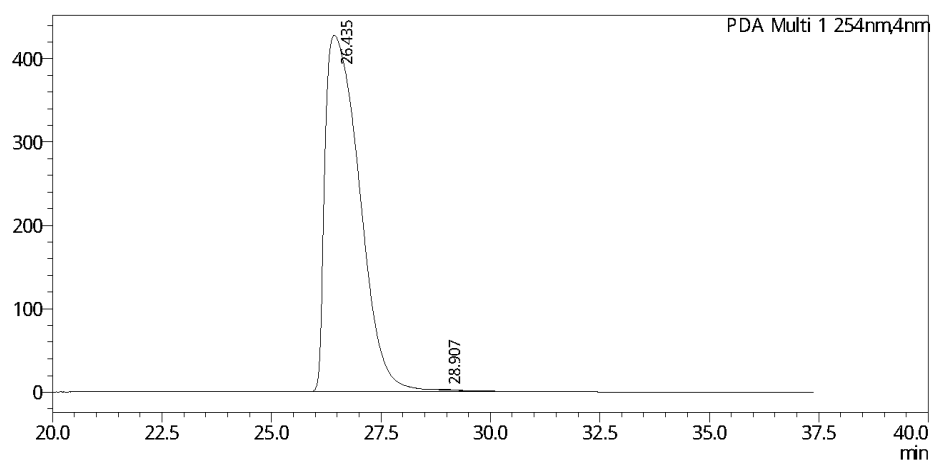

<ピークレポート>

PDA Ch1 254nm

| ピーク#  | 保持時間   | 面積       | 高さ     | 面積%     |
|-------|--------|----------|--------|---------|
| 1     | 26.435 | 23462447 | 427765 | 99.919  |
| 2     | 28.907 | 18906    | 804    | 0.081   |
| Total |        | 23481353 | 428569 | 100.000 |

3ej

Daicel Chiralpak AD-H, hexane/*i*-PrOH = 80/20, flow rate = 1.0 mL/min,  $\lambda$  = 267 nm, retention time;  $t_R$ (major) = 34.9 min,  $t_R$ (minor) = 37.8 min.

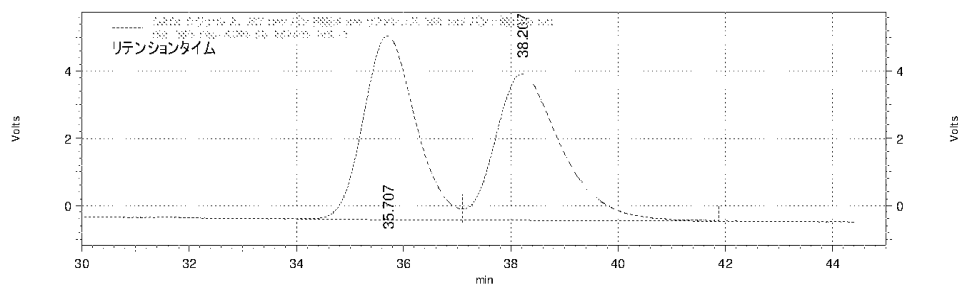

DAD: シグナル A, 267 nm/ バンド幅:4 nm リファレンス  
360 nm/ バンド幅:100 nm 結果  
リテンションタイム

|        | 面積%    |
|--------|--------|
| 35.707 | 49.942 |
| 38.207 | 50.058 |

|    |         |
|----|---------|
| 合計 | 100.000 |
|----|---------|

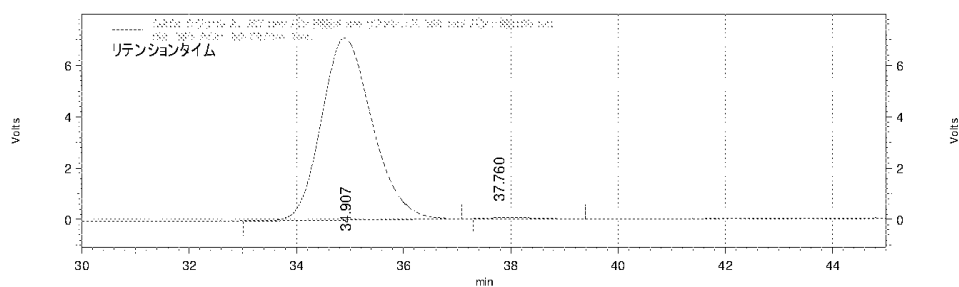

DAD: シグナル A, 267 nm/ バンド幅:4 nm リファレンス  
360 nm/ バンド幅:100 nm 結果  
リテンションタイム

|        | 面積%    |
|--------|--------|
| 34.907 | 99.444 |
| 37.760 | 0.556  |

|    |         |
|----|---------|
| 合計 | 100.000 |
|----|---------|

3fj

Daicel Chiralpak AD-H, hexane/*i*-PrOH = 85/15, flow rate = 1.0 mL/min,  $\lambda$  = 267 nm, retention time;  $t_R$ (major) = 11.1 min,  $t_R$ (minor) = 13.0 min.

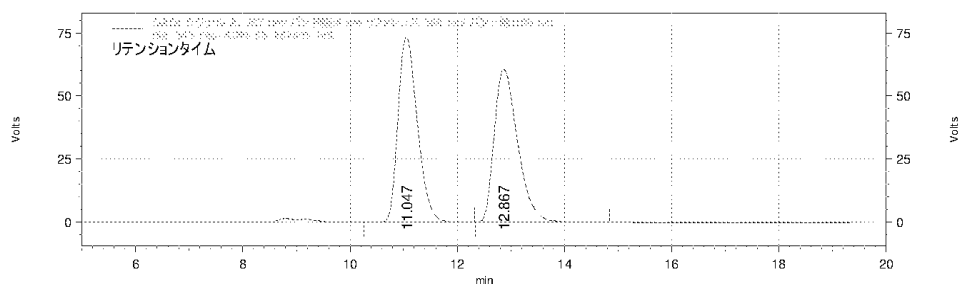

DAD: シグナル A, 267 nm/ バンド幅:4 nm リファレンス  
360 nm/ バンド幅:100 nm 結果  
リテンションタイム

|        | 面積%    |
|--------|--------|
| 11.047 | 50.103 |
| 12.867 | 49.897 |

|    |         |
|----|---------|
| 合計 | 100.000 |
|----|---------|

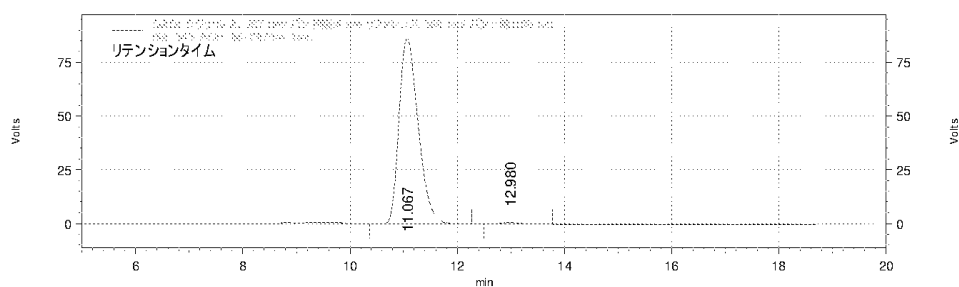

DAD: シグナル A, 267 nm/ バンド幅:4 nm リファレンス  
360 nm/ バンド幅:100 nm 結果  
リテンションタイム

|        | 面積%    |
|--------|--------|
| 11.067 | 99.035 |
| 12.980 | 0.965  |

|    |         |
|----|---------|
| 合計 | 100.000 |
|----|---------|

3gj

Daicel Chiralpak AD-H, hexane/*i*-PrOH = 95/5, flow rate = 1.0 mL/min,  $\lambda$  = 267 nm, retention time;  $t_R$ (major) = 15.7 min,  $t_R$ (minor) = 18.7 min.

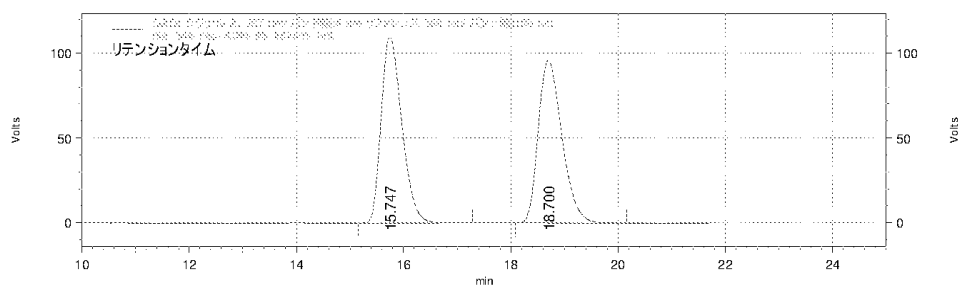

DAD: シグナル A, 267 nm/ バンド幅:4 nm リファレンス  
360 nm/ バンド幅:100 nm 結果  
リテンションタイム

|        | 面積%    |
|--------|--------|
| 15.747 | 50.032 |
| 18.700 | 49.968 |

|    |         |
|----|---------|
| 合計 | 100.000 |
|----|---------|

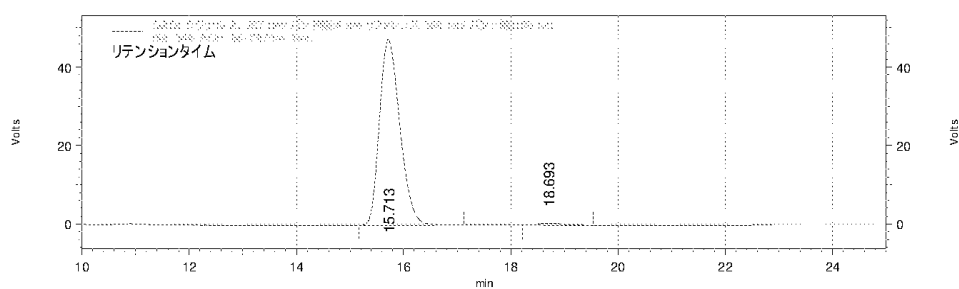

DAD: シグナル A, 267 nm/ バンド幅:4 nm リファレンス  
360 nm/ バンド幅:100 nm 結果  
リテンションタイム

|        | 面積%    |
|--------|--------|
| 15.713 | 98.658 |
| 18.693 | 1.342  |

|    |         |
|----|---------|
| 合計 | 100.000 |
|----|---------|

3hj

Daicel Chiralpak IB-3, hexane/*i*-PrOH = 93/7, flow rate = 1.0 mL/min,  $\lambda$  = 254 nm, retention time;  $t_R$ (minor) = 19.3 min,  $t_R$ (major) = 35.6 min.

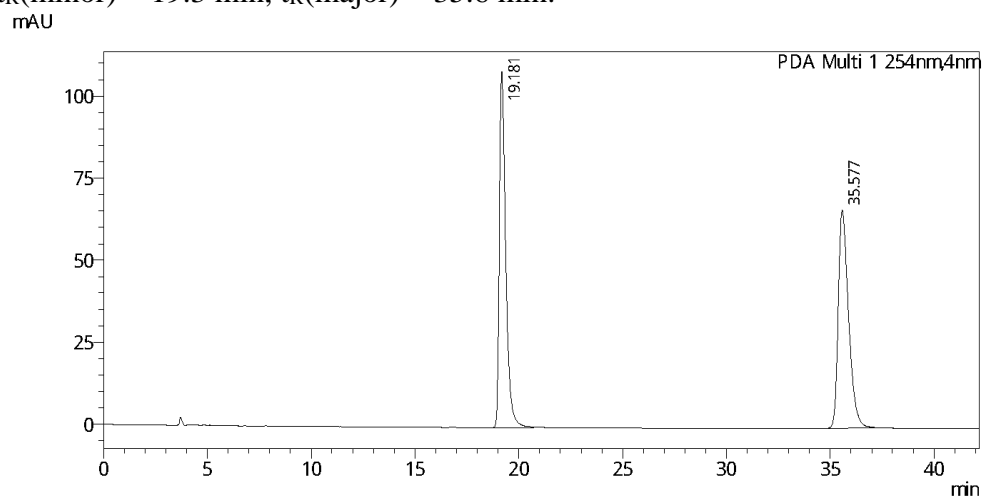

<ピークレポート>

PDA Ch1 254nm

| ピーク#  | 保持時間   | 面積      | 高さ     | 面積%     |
|-------|--------|---------|--------|---------|
| 1     | 19.181 | 2310640 | 108502 | 50.122  |
| 2     | 35.577 | 2299430 | 66476  | 49.878  |
| Total |        | 4610070 | 174978 | 100.000 |

mAU

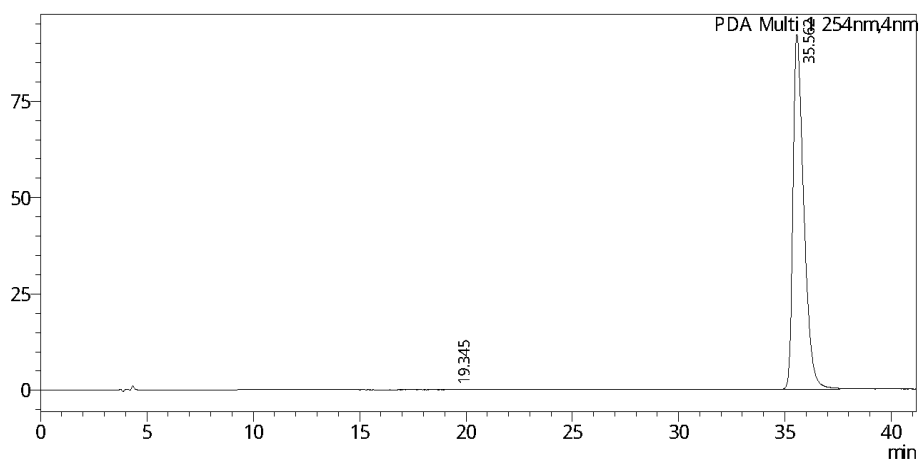

<ピークレポート>

PDA Ch1 254nm

| ピーク#  | 保持時間   | 面積      | 高さ    | 面積%     |
|-------|--------|---------|-------|---------|
| 1     | 19.345 | 3242    | 171   | 0.099   |
| 2     | 35.562 | 3267939 | 92141 | 99.901  |
| Total |        | 3271181 | 92312 | 100.000 |

3ij

Daicel Chiralpak IB-3, hexane/*i*-PrOH = 95/5, flow rate = 1.0 mL/min,  $\lambda$  = 254 nm, retention time;  $t_R$ (minor) = 18.1 min,  $t_R$ (major) = 25.3 min.

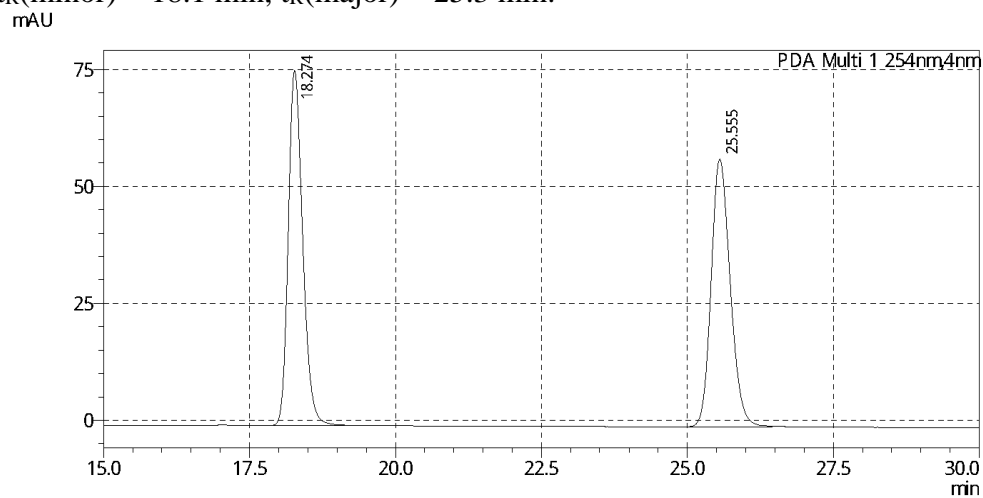

<ピークレポート>

PDA Ch1 254nm

| ピーク#  | 保持時間   | 面積      | 高さ     | 面積%     |
|-------|--------|---------|--------|---------|
| 1     | 18.274 | 1304782 | 75965  | 50.104  |
| 2     | 25.555 | 1299368 | 57218  | 49.896  |
| Total |        | 2604150 | 133183 | 100.000 |

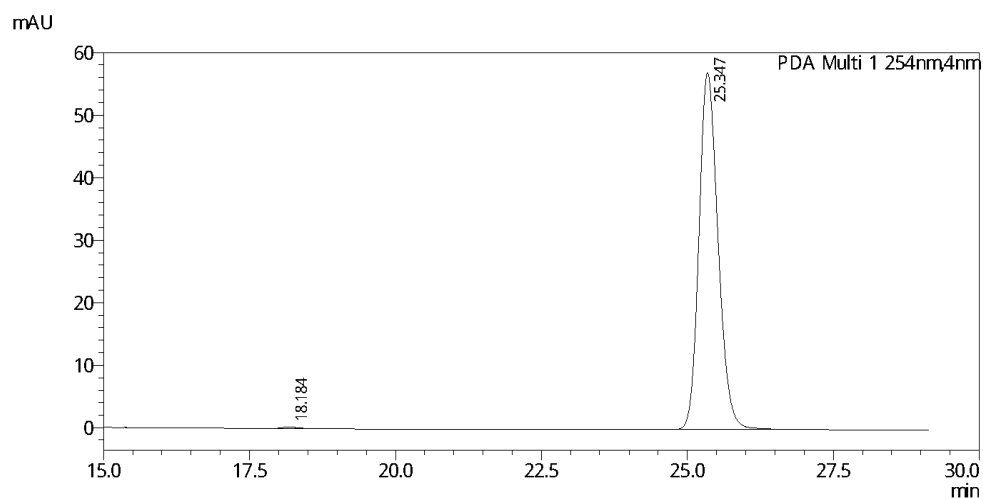

<ピークレポート>

PDA Ch1 254nm

| ピーク#  | 保持時間   | 面積      | 高さ    | 面積%     |
|-------|--------|---------|-------|---------|
| 1     | 18.184 | 4830    | 300   | 0.371   |
| 2     | 25.347 | 1297362 | 57091 | 99.629  |
| Total |        | 1302192 | 57390 | 100.000 |



3jj

Daicel Chiralpak IB-3, hexane/*i*-PrOH = 95/5, flow rate = 1.0 mL/min,  $\lambda$  = 254 nm, retention time;  $t_R$ (minor) = 21.8 min,  $t_R$ (major) = 28.7 min.

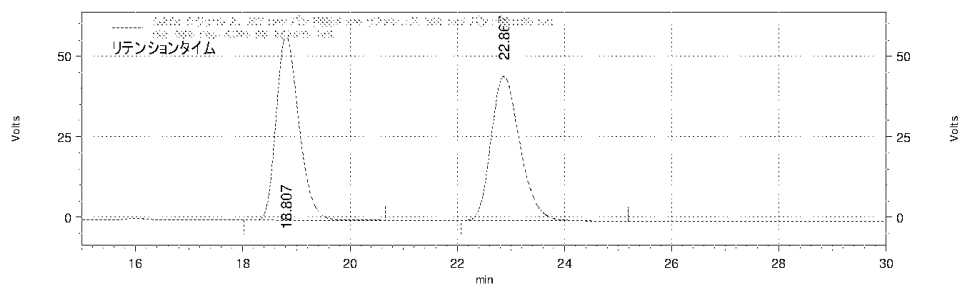

DAD: シグナル A, 267 nm/ バンド幅:4 nm リファレンス  
360 nm/ バンド幅:100 nm 結果  
リテンションタイム

|        | 面積%    |
|--------|--------|
| 18.807 | 50.142 |
| 22.867 | 49.858 |

|    |         |
|----|---------|
| 合計 | 100.000 |
|----|---------|

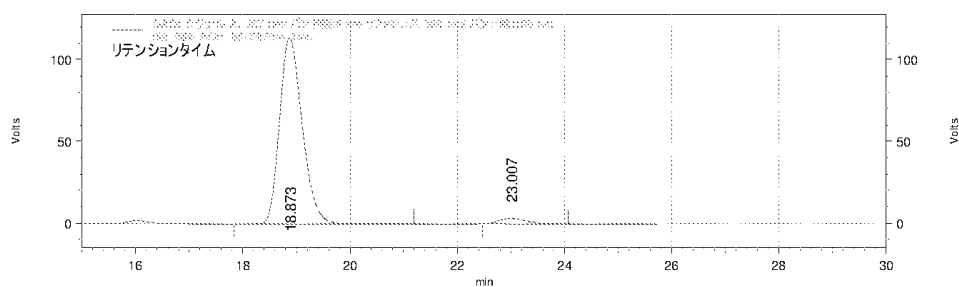

DAD: シグナル A, 267 nm/ バンド幅:4 nm リファレンス  
360 nm/ バンド幅:100 nm 結果  
リテンションタイム

|        | 面積%    |
|--------|--------|
| 18.873 | 96.560 |
| 23.007 | 3.440  |

|    |         |
|----|---------|
| 合計 | 100.000 |
|----|---------|

### 3kc

Daicel Chiralpak AD-H, hexane/*i*-PrOH = 96/4, flow rate = 1.0 mL/min,  $\lambda$  = 267 nm, retention time;  $t_R$ (major) = 18.9 min,  $t_R$ (minor) = 23.0 min.

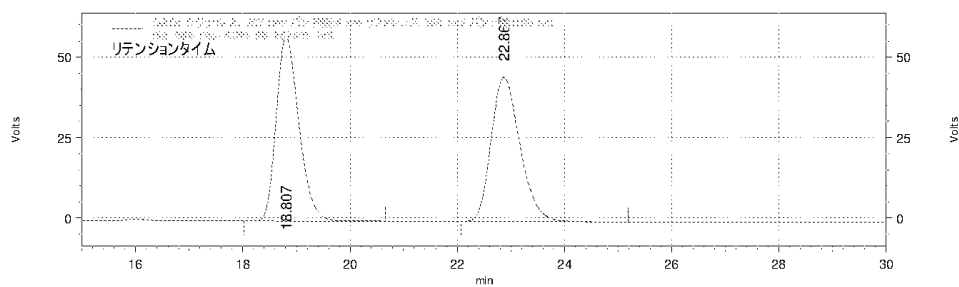

DAD: シグナル A, 267 nm/ バンド幅:4 nm リファレンス  
360 nm/ バンド幅:100 nm 結果  
リテンションタイム

|        | 面積%    |
|--------|--------|
| 18.807 | 50.142 |
| 22.867 | 49.858 |

|    |         |
|----|---------|
| 合計 | 100.000 |
|----|---------|

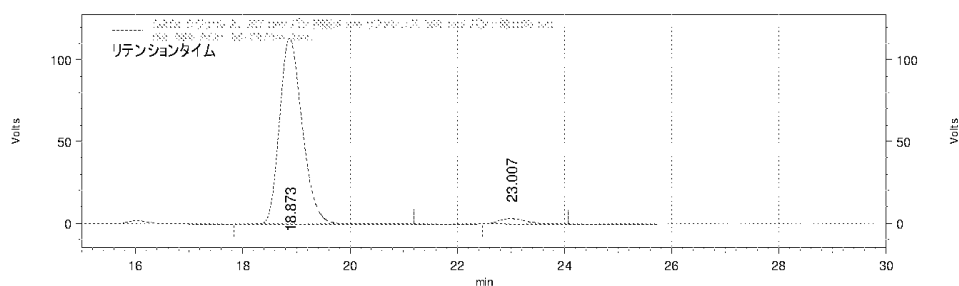

DAD: シグナル A, 267 nm/ バンド幅:4 nm リファレンス  
360 nm/ バンド幅:100 nm 結果  
リテンションタイム

|        | 面積%    |
|--------|--------|
| 18.873 | 96.560 |
| 23.007 | 3.440  |

|    |         |
|----|---------|
| 合計 | 100.000 |
|----|---------|

3kj

Daicel Chiralpak IB-3, hexane/*i*-PrOH = 96/4, flow rate = 1.0 mL/min,  $\lambda$  = 254 nm, retention time;  $t_R$ (minor) = 31.1 min,  $t_R$ (major) = 43.5 min.

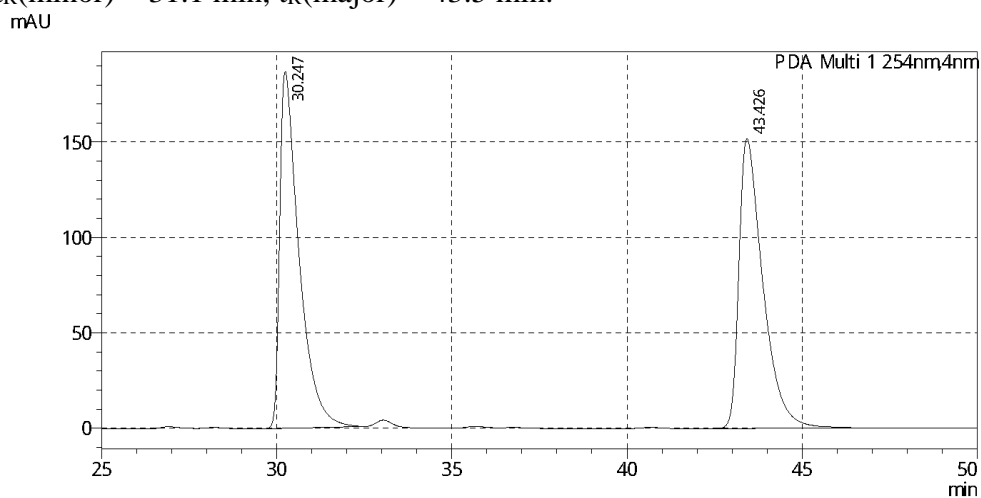

<ピークレポート>

PDA Ch1 254nm

| ピーク#  | 保持時間   | 面積       | 高さ     | 面積%     |
|-------|--------|----------|--------|---------|
| 1     | 30.247 | 7144850  | 186978 | 49.727  |
| 2     | 43.426 | 7223297  | 152007 | 50.273  |
| Total |        | 14368147 | 338985 | 100.000 |

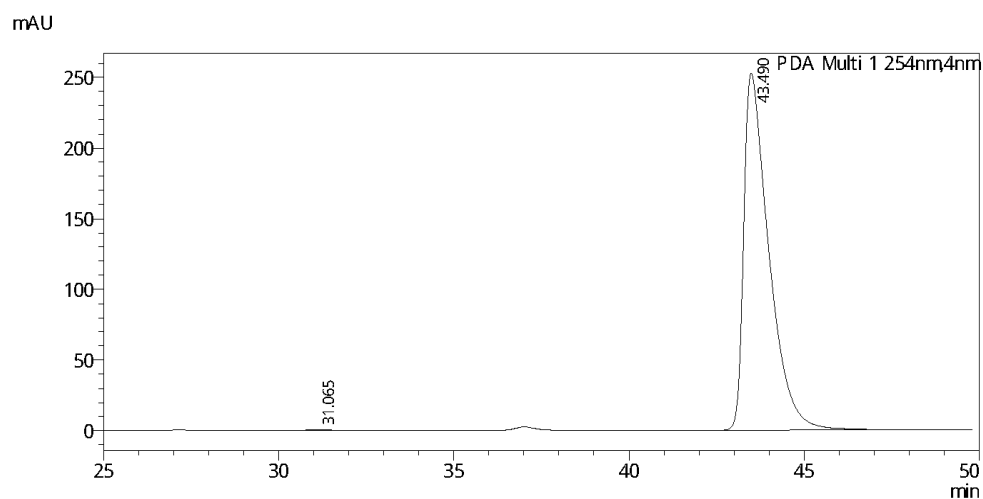

<ピークレポート>

PDA Ch1 254nm

| ピーク#  | 保持時間   | 面積       | 高さ     | 面積%     |
|-------|--------|----------|--------|---------|
| 1     | 31.065 | 13765    | 400    | 0.109   |
| 2     | 43.490 | 12571889 | 252645 | 99.891  |
| Total |        | 12585654 | 253044 | 100.000 |

**3lc**

Daicel Chiralpak AD-H, hexane/*i*-PrOH = 96/4, flow rate = 1.0 mL/min,  $\lambda$  = 267 nm, retention time;  $t_R$ (minor) = 7.0 min,  $t_R$ (major) = 7.7 min.

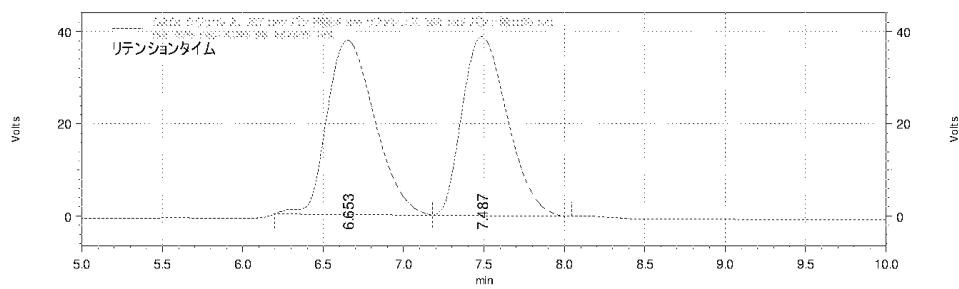

DAD: シグナル A, 267 nm/ バンド幅:4 nm リファレンス  
360 nm/ バンド幅:100 nm 結果  
リテンションタイム

|       | 面積%    |
|-------|--------|
| 6.653 | 50.558 |
| 7.487 | 49.442 |

|    |         |
|----|---------|
| 合計 | 100.000 |
|----|---------|

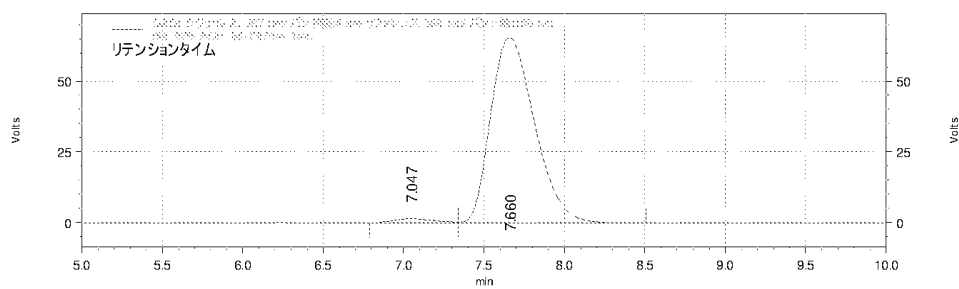

DAD: シグナル A, 267 nm/ バンド幅:4 nm リファレンス  
360 nm/ バンド幅:100 nm 結果  
リテンションタイム

|       | 面積%    |
|-------|--------|
| 7.047 | 1.926  |
| 7.660 | 98.074 |

|    |         |
|----|---------|
| 合計 | 100.000 |
|----|---------|

3lj

Daicel Chiralpak IA-3, hexane/*i*-PrOH = 97/3, flow rate = 1.0 mL/min,  $\lambda$  = 254 nm, retention time;  $t_R$ (major) = 12.5 min,  $t_R$ (minor) = 15.9 min.

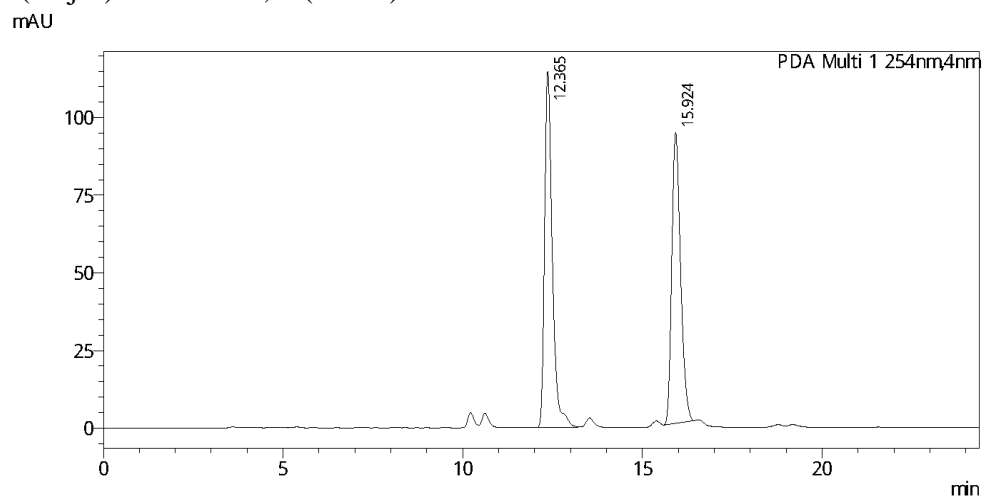

<ピークレポート>

PDA Ch1 254nm

| ピーク#  | 保持時間   | 面積      | 高さ     | 面積%     |
|-------|--------|---------|--------|---------|
| 1     | 12.365 | 1720929 | 114770 | 51.877  |
| 2     | 15.924 | 1596372 | 93682  | 48.123  |
| Total |        | 3317301 | 208452 | 100.000 |

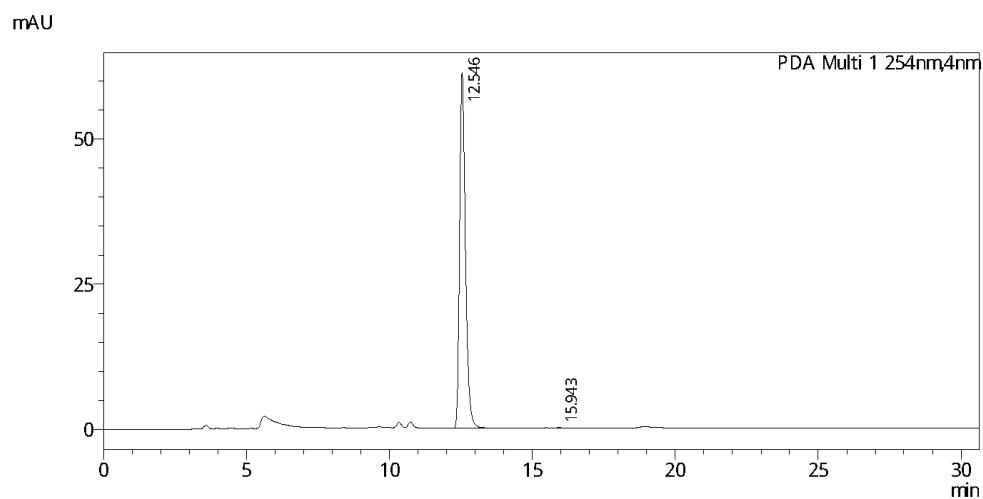

<ピークレポート>

PDA Ch1 254nm

| ピーク#  | 保持時間   | 面積     | 高さ    | 面積%     |
|-------|--------|--------|-------|---------|
| 1     | 12.546 | 869495 | 61222 | 99.868  |
| 2     | 15.943 | 1147   | 90    | 0.132   |
| Total |        | 870642 | 61312 | 100.000 |

### 3mc

Daicel Chiralpak AD-H, hexane/*i*-PrOH = 90/10, flow rate = 1.0 mL/min,  $\lambda$  = 254 nm, retention time;  $t_R$ (major) = 20.6 min,  $t_R$ (minor) = 21.9 min.

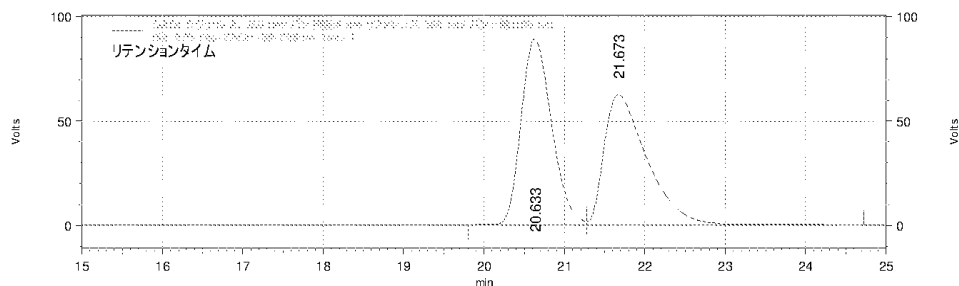

DAD: シグナル A, 259 nm/ バンド幅:4 nm リファレンス  
360 nm/ バンド幅:100 nm 結果  
リテンションタイム

|        | 面積%    |
|--------|--------|
| 20.633 | 50.472 |
| 21.673 | 49.528 |

|    |         |
|----|---------|
| 合計 | 100.000 |
|----|---------|

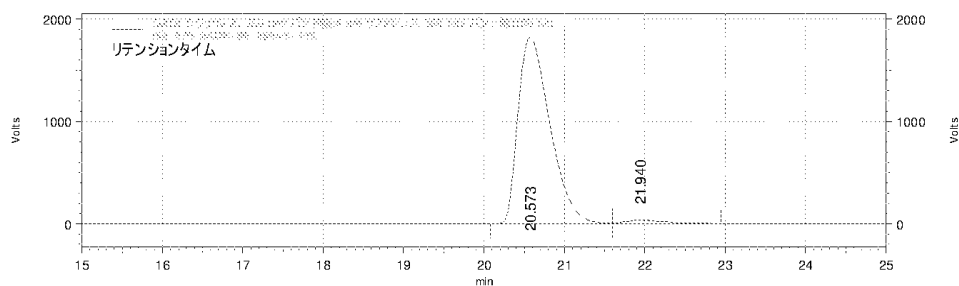

DAD: シグナル A, 259 nm/ バンド幅:4 nm リファレンス  
360 nm/ バンド幅:100 nm 結果  
リテンションタイム

|        | 面積%    |
|--------|--------|
| 20.573 | 97.834 |
| 21.940 | 2.166  |

|    |         |
|----|---------|
| 合計 | 100.000 |
|----|---------|

**3mj**

Daicel Chiralpak AD-H, hexane/*i*-PrOH = 99/1, flow rate = 1.0 mL/min,  $\lambda$  = 267 nm, retention time;  $t_R$ (major) = 15.2 min,  $t_R$ (minor) = 21.9 min.

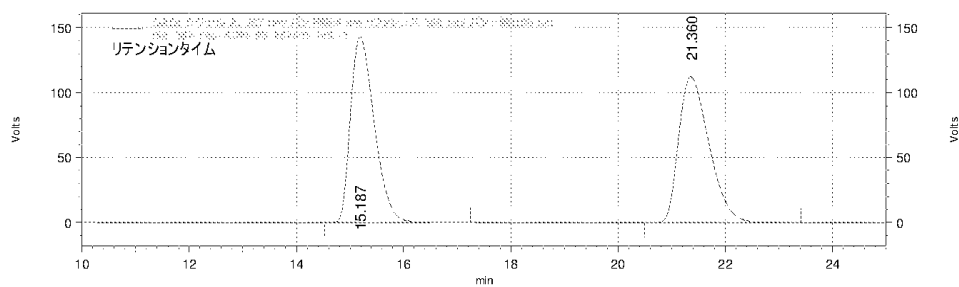

DAD: シグナル A, 267 nm/ バンド幅:4 nm リファレンス  
360 nm/ バンド幅:100 nm 結果  
リテンションタイム

|        | 面積%    |
|--------|--------|
| 15.187 | 50.134 |
| 21.360 | 49.866 |

|    |         |
|----|---------|
| 合計 | 100.000 |
|----|---------|

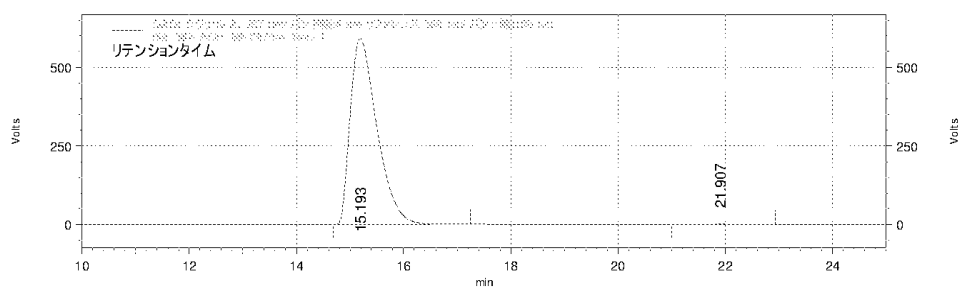

DAD: シグナル A, 267 nm/ バンド幅:4 nm リファレンス  
360 nm/ バンド幅:100 nm 結果  
リテンションタイム

|        | 面積%    |
|--------|--------|
| 15.193 | 99.884 |
| 21.907 | 0.116  |

|    |         |
|----|---------|
| 合計 | 100.000 |
|----|---------|

3nj

Daicel Chiralpak IA-3, hexane/*i*-PrOH = 99/1, flow rate = 1.0 mL/min,  $\lambda$  = 254 nm, retention time;  $t_R$ (major) = 9.3 min,  $t_R$ (minor) = 12.6 min.

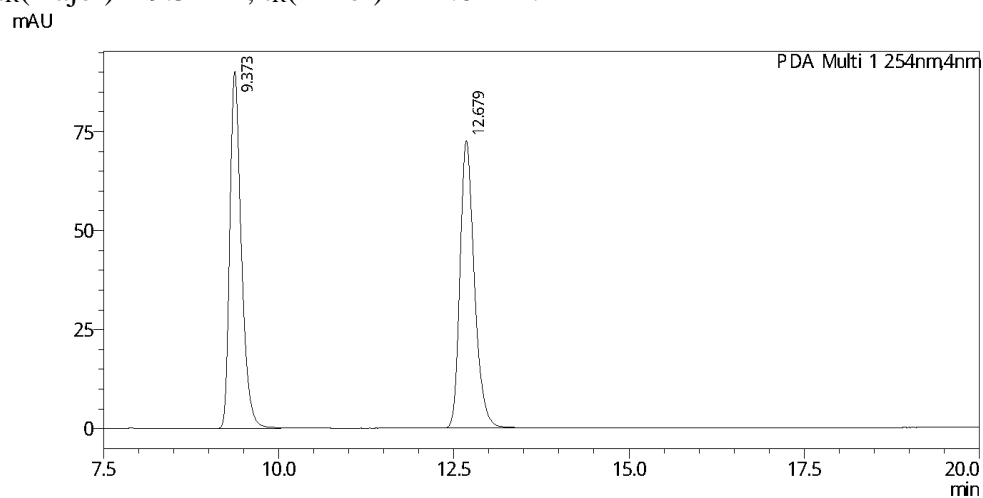

<ピークレポート>

PDA Ch1 254nm

| ピーク#  | 保持時間   | 面積      | 高さ     | 面積%     |
|-------|--------|---------|--------|---------|
| 1     | 9.373  | 1034366 | 90236  | 49.917  |
| 2     | 12.679 | 1037789 | 72675  | 50.083  |
| Total |        | 2072155 | 162910 | 100.000 |

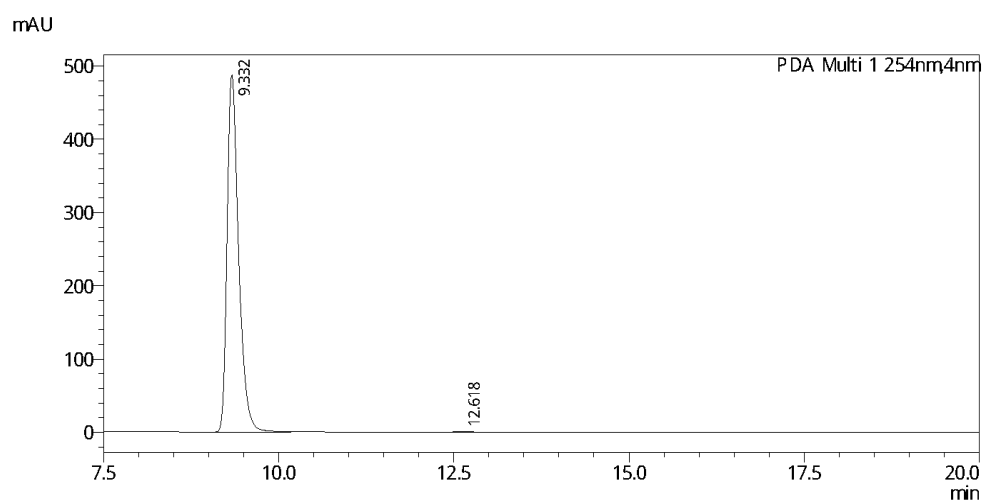

<ピークレポート>

PDA Ch1 254nm

| ピーク#  | 保持時間   | 面積      | 高さ     | 面積%     |
|-------|--------|---------|--------|---------|
| 1     | 9.332  | 5587117 | 487794 | 99.776  |
| 2     | 12.618 | 12532   | 905    | 0.224   |
| Total |        | 5599649 | 488699 | 100.000 |



3oj

Daicel Chiralpak AD-H, hexane/*i*-PrOH = 99/1, flow rate = 1.0 mL/min,  $\lambda$  = 267 nm, retention time;  $t_R$ (major) = 14.6 min,  $t_R$ (minor) = 30.7 min.

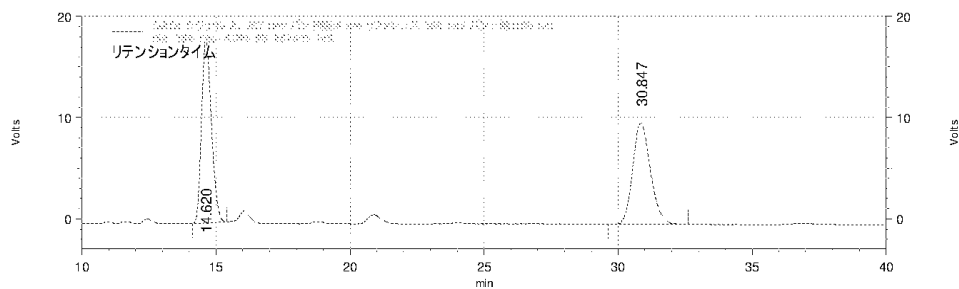

DAD: シグナル A, 267 nm/ バンド幅:4 nm リファレンス  
360 nm/ バンド幅:100 nm 結果  
リテンションタイム

|        | 面積%    |
|--------|--------|
| 14.620 | 50.237 |
| 30.847 | 49.763 |

|    |         |
|----|---------|
| 合計 | 100.000 |
|----|---------|

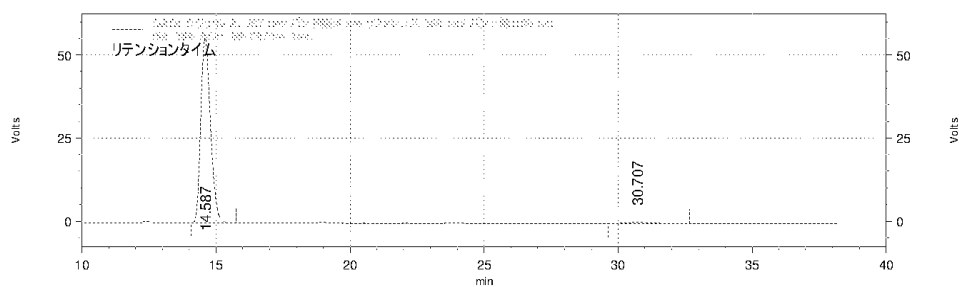

DAD: シグナル A, 267 nm/ バンド幅:4 nm リファレンス  
360 nm/ バンド幅:100 nm 結果  
リテンションタイム

|        | 面積%    |
|--------|--------|
| 14.587 | 98.490 |
| 30.707 | 1.510  |

|    |         |
|----|---------|
| 合計 | 100.000 |
|----|---------|

**3pc**

Daicel Chiralpak AD-H, hexane/*i*-PrOH = 90/10, flow rate = 1.0 mL/min,  $\lambda$  = 254 nm, retention time;  $t_R(\text{major})$  = 35.6 min,  $t_R(\text{minor})$  = 40.6 min.

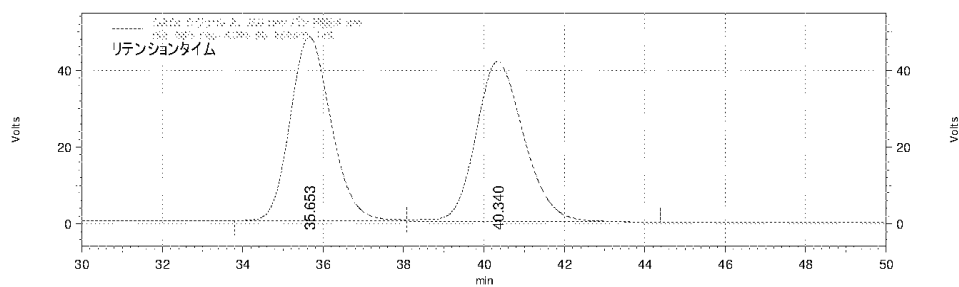

DAD: シグナル A, 250 nm/ バンド幅:4 nm 結果  
リテンションタイム

|        | 面積%    |
|--------|--------|
| 35.653 | 49.557 |
| 40.340 | 50.443 |

|    |         |
|----|---------|
| 合計 | 100.000 |
|----|---------|

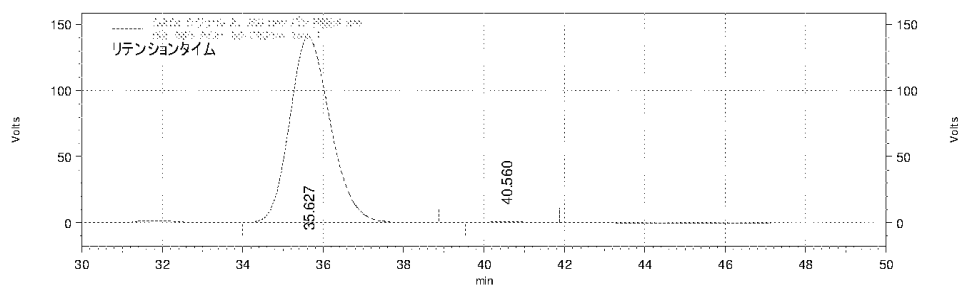

DAD: シグナル A, 260 nm/ バンド幅:4 nm 結果  
リテンションタイム

|        | 面積%    |
|--------|--------|
| 35.627 | 99.425 |
| 40.560 | 0.575  |

|    |         |
|----|---------|
| 合計 | 100.000 |
|----|---------|

3pj

Daicel Chiralpak AD-H, hexane/*i*-PrOH = 90/10, flow rate = 1.0 mL/min,  $\lambda$  = 260 nm, retention time;  $t_R$ (major) = 39.2 min,  $t_R$ (minor) = 45.4 min.

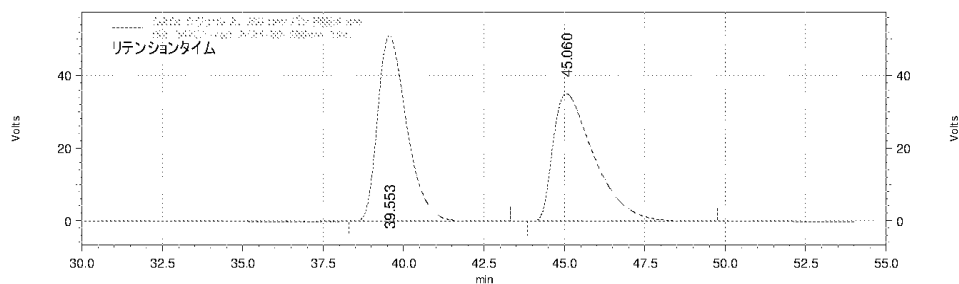

DAD: シグナル A, 260 nm/ バンド幅:4 nm 結果  
リテンションタイム

|        | 面積%     |
|--------|---------|
| 39.553 | 50.785  |
| 45.060 | 49.215  |
| 合計     | 100.000 |

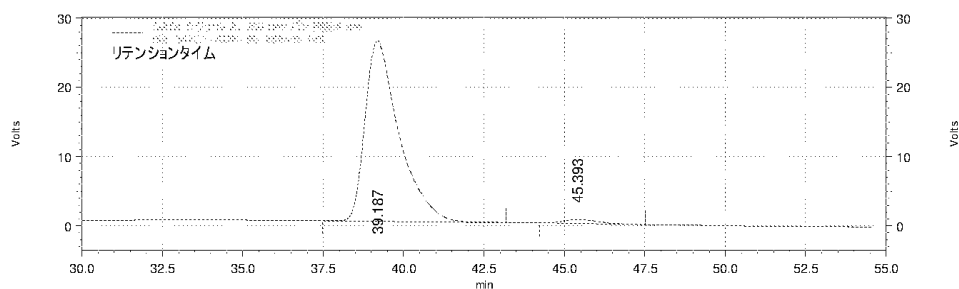

DAD: シグナル A, 260 nm/ バンド幅:4 nm 結果  
リテンションタイム

|        | 面積%     |
|--------|---------|
| 39.187 | 97.760  |
| 45.393 | 2.240   |
| 合計     | 100.000 |

3qj

Daicel Chiralpak AD-H, hexane/*i*-PrOH = 99/1, flow rate = 1.0 mL/min,  $\lambda$  = 260 nm, retention time;  $t_R$ (major) = 24.7 min,  $t_R$ (minor) = 28.7 min.

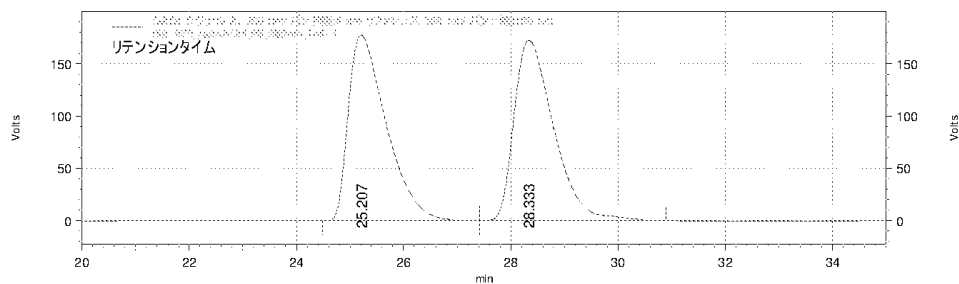

DAD: シグナル A, 260 nm/ バンド幅:4 nm リファレンス  
360 nm/ バンド幅:100 nm 結果  
リテンションタイム

|        | 面積%    |
|--------|--------|
| 25.207 | 49.651 |
| 28.333 | 50.349 |

|    |         |
|----|---------|
| 合計 | 100.000 |
|----|---------|

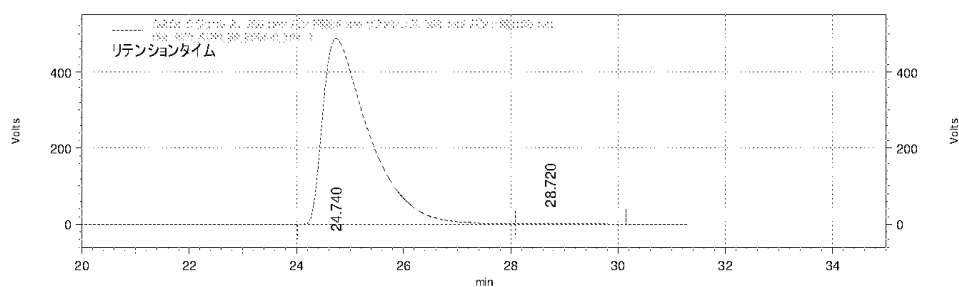

DAD: シグナル A, 260 nm/ バンド幅:4 nm リファレンス  
360 nm/ バンド幅:100 nm 結果  
リテンションタイム

|        | 面積%    |
|--------|--------|
| 24.740 | 99.641 |
| 28.720 | 0.359  |

|    |         |
|----|---------|
| 合計 | 100.000 |
|----|---------|

3rj

Daicel Chiralpak AD-H, hexane/*i*-PrOH = 99/1, flow rate = 1.0 mL/min,  $\lambda$  = 260 nm, retention time;  $t_R$ (major) = 59.2 min,  $t_R$ (minor) = 67.4 min.

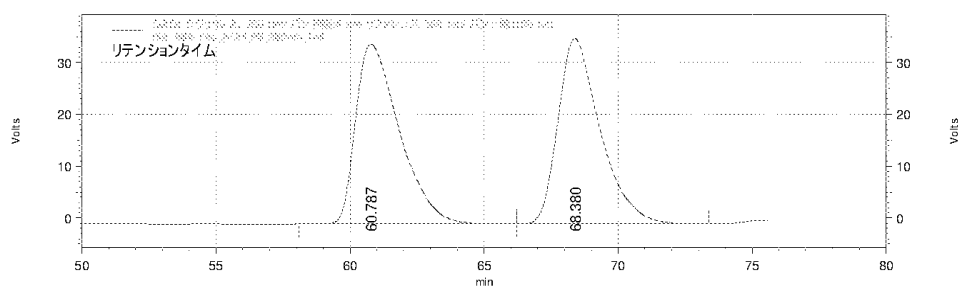

DAD: シグナル A, 260 nm/ バンド幅:4 nm リファレンス  
360 nm/ バンド幅:100 nm 結果  
リテンションタイム

|        | 面積%    |
|--------|--------|
| 60.787 | 50.050 |
| 68.380 | 49.950 |

|    |         |
|----|---------|
| 合計 | 100.000 |
|----|---------|

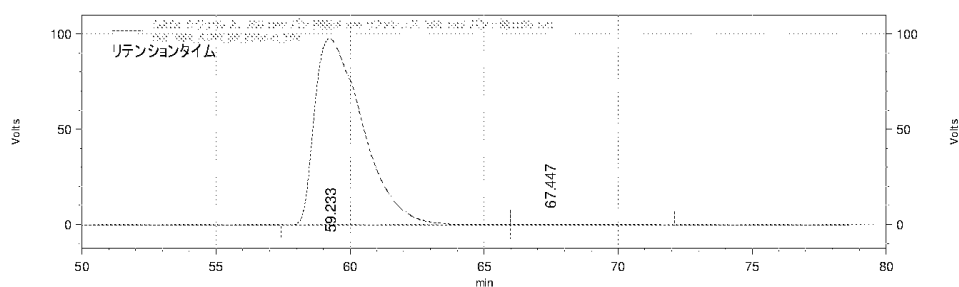

DAD: シグナル A, 260 nm/ バンド幅:4 nm リファレンス  
360 nm/ バンド幅:100 nm 結果  
リテンションタイム

|        | 面積%    |
|--------|--------|
| 59.233 | 99.659 |
| 67.447 | 0.341  |

|    |         |
|----|---------|
| 合計 | 100.000 |
|----|---------|

3sj

Daicel Chiralpak AD-H, hexane/*i*-PrOH = 99/1, flow rate = 1.0 mL/min,  $\lambda$  = 260 nm, retention time;  $t_R$ (major) = 27.2 min,  $t_R$ (minor) = 31.8 min.

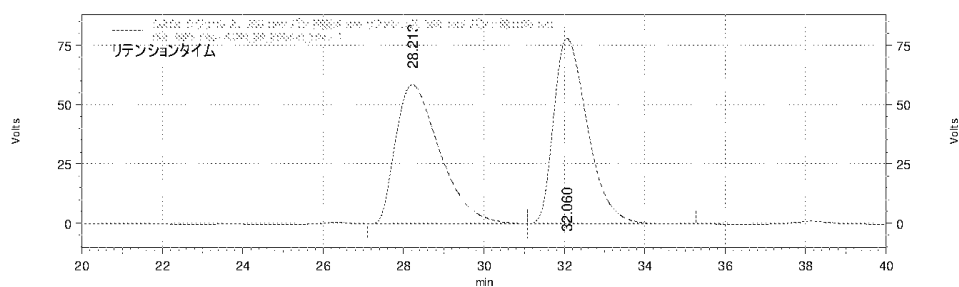

DAD: シグナル A, 260 nm/ バンド幅:4 nm リファレンス  
360 nm/ バンド幅:100 nm 結果  
リテンションタイム

|        | 面積%    |
|--------|--------|
| 28.213 | 49.572 |
| 32.060 | 50.428 |

|    |         |
|----|---------|
| 合計 | 100.000 |
|----|---------|

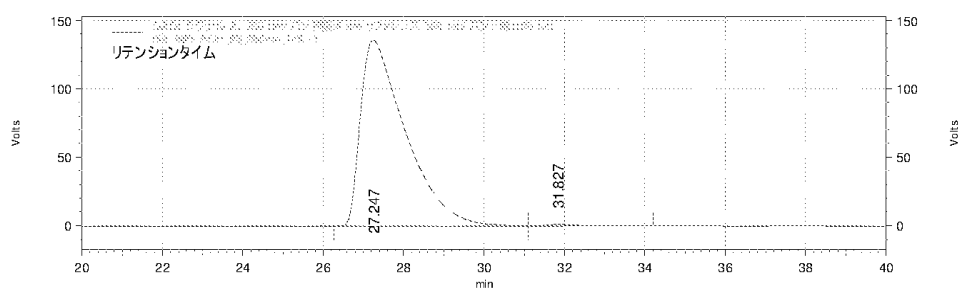

DAD: シグナル A, 260 nm/ バンド幅:4 nm リファレンス  
360 nm/ バンド幅:100 nm 結果  
リテンションタイム

|        | 面積%    |
|--------|--------|
| 27.247 | 99.320 |
| 31.827 | 0.680  |

|    |         |
|----|---------|
| 合計 | 100.000 |
|----|---------|

3tj

Daicel Chiralpak AD-H, hexane/*i*-PrOH = 99/1, flow rate = 1.0 mL/min,  $\lambda$  = 260 nm, retention time;  $t_R(\text{major})$  = 27.7 min,  $t_R(\text{minor})$  = 32.1 min.

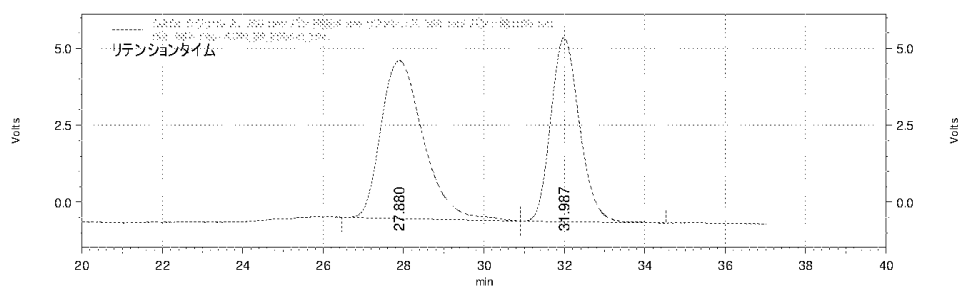

DAD: シグナル A, 260 nm/ バンド幅:4 nm リファレンス  
360 nm/ バンド幅:100 nm 結果  
リテンションタイム

|        | 面積%    |
|--------|--------|
| 27.880 | 55.852 |
| 31.987 | 44.148 |

|    |         |
|----|---------|
| 合計 | 100.000 |
|----|---------|

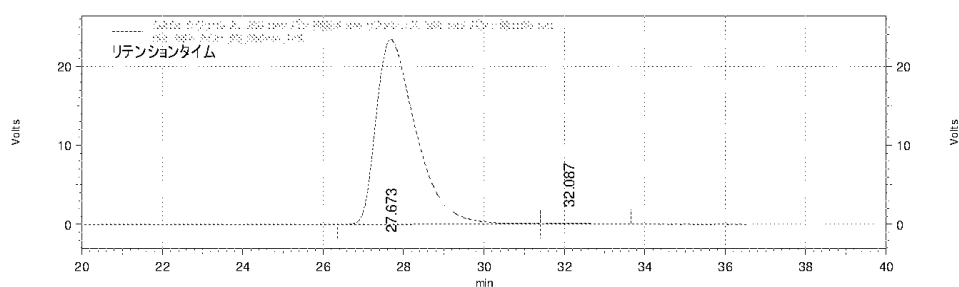

DAD: シグナル A, 260 nm/ バンド幅:4 nm リファレンス  
360 nm/ バンド幅:100 nm 結果  
リテンションタイム

|        | 面積%    |
|--------|--------|
| 27.673 | 99.490 |
| 32.087 | 0.510  |

|    |         |
|----|---------|
| 合計 | 100.000 |
|----|---------|

3uj

Daicel Chiralpak AD-H, hexane/*i*-PrOH = 99/1, flow rate = 1.0 mL/min,  $\lambda$  = 260 nm, retention time;  $t_R$ (major) = 12.6 min,  $t_R$ (minor) = 14.9 min.

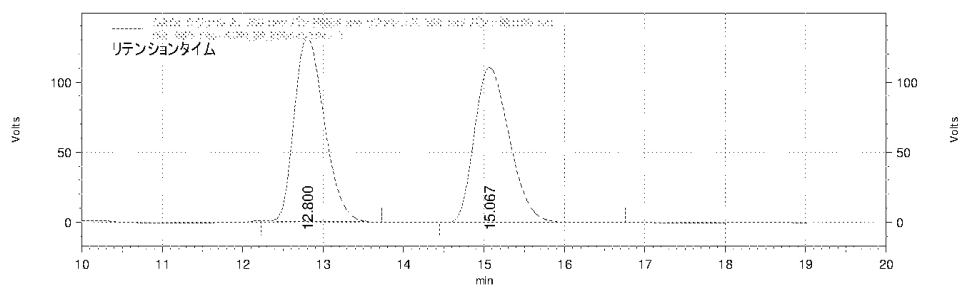

DAD: シグナル A, 260 nm/ バンド幅:4 nm リファレンス  
360 nm/ バンド幅:100 nm 結果  
リテンションタイム

|        | 面積%    |
|--------|--------|
| 12.800 | 50.364 |
| 15.067 | 49.636 |

|    |         |
|----|---------|
| 合計 | 100.000 |
|----|---------|

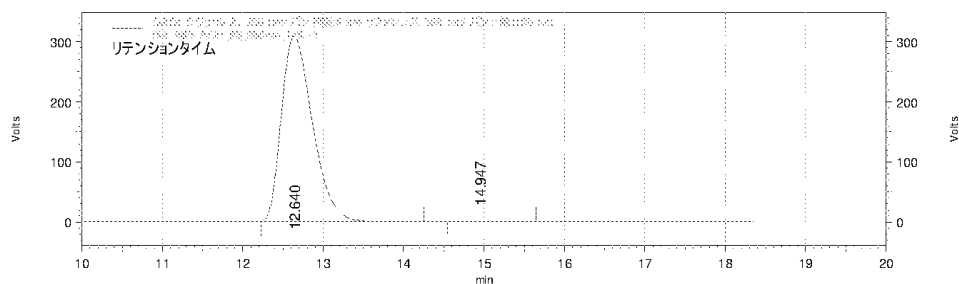

DAD: シグナル A, 260 nm/ バンド幅:4 nm リファレンス  
360 nm/ バンド幅:100 nm 結果  
リテンションタイム

|        | 面積%    |
|--------|--------|
| 12.640 | 99.867 |
| 14.947 | 0.133  |

|    |         |
|----|---------|
| 合計 | 100.000 |
|----|---------|



3vj

Daicel Chiralpak AD-H, hexane/*i*-PrOH = 80/20, flow rate = 1.0 mL/min,  $\lambda$  = 260 nm, retention time;  $t_R$ (minor) = 13.5 min,  $t_R$ (major) = 22.6 min.

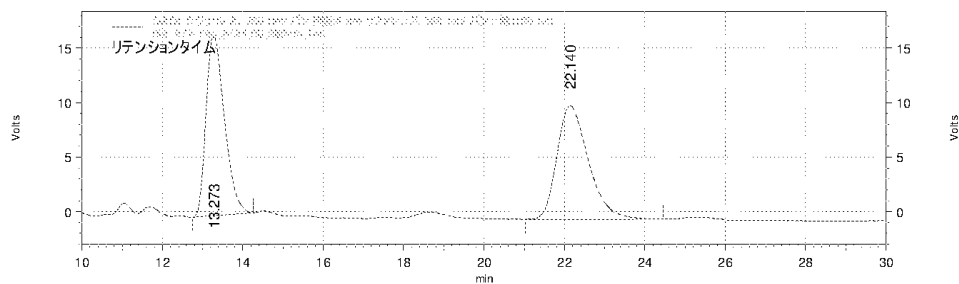

DAD: シグナル A, 260 nm/ バンド幅:4 nm リファレンス  
360 nm/ バンド幅:100 nm 結果  
リテンションタイム

|        | 面積%    |
|--------|--------|
| 13.273 | 48.034 |
| 22.140 | 51.966 |

|    |         |
|----|---------|
| 合計 | 100.000 |
|----|---------|

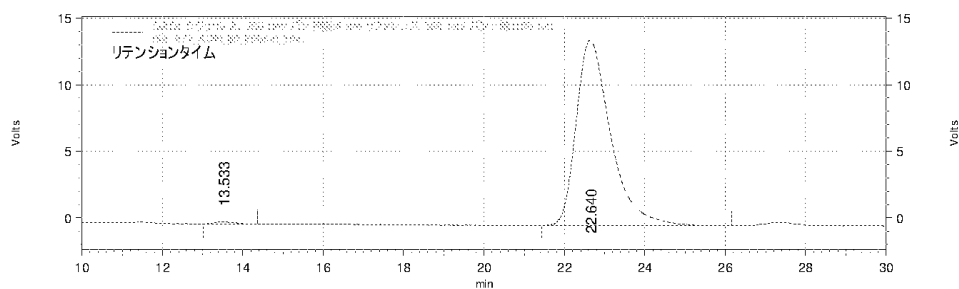

DAD: シグナル A, 260 nm/ バンド幅:4 nm リファレンス  
360 nm/ バンド幅:100 nm 結果  
リテンションタイム

|        | 面積%    |
|--------|--------|
| 13.533 | 0.647  |
| 22.640 | 99.353 |

|    |         |
|----|---------|
| 合計 | 100.000 |
|----|---------|

3wj

Daicel Chiralpak AD-H, hexane/*i*-PrOH = 80/20, flow rate = 1.0 mL/min,  $\lambda$  = 254 nm, retention time;  $t_R$ (minor) = 18.4 min,  $t_R$ (major) = 34.7 min.

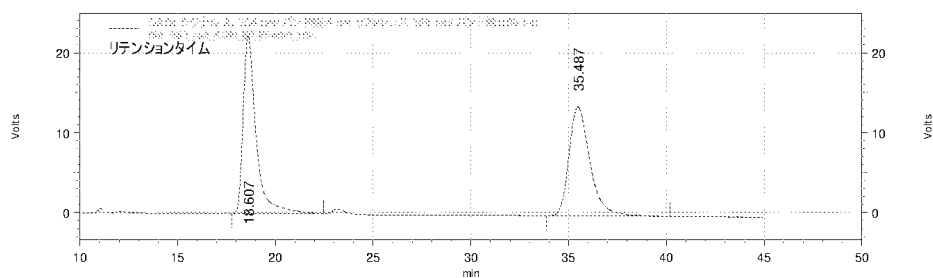

DAD: シグナル A, 254 nm/ バンド幅:4 nm リファレンス  
360 nm/ バンド幅:100 nm 結果  
リテンションタイム

|        | 面積%     |
|--------|---------|
| 18.607 | 50.095  |
| 35.487 | 49.905  |
| 合計     | 100.000 |

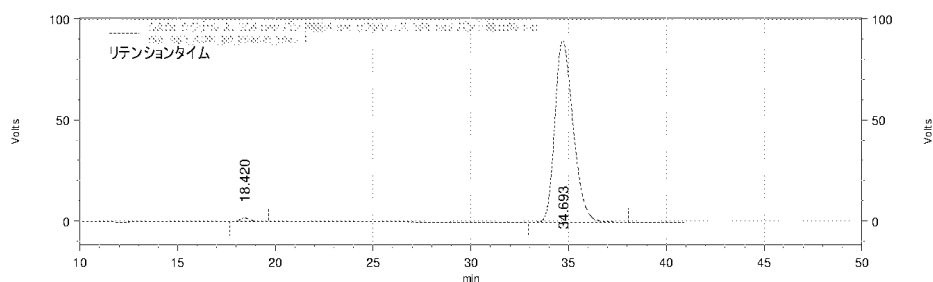

DAD: シグナル A, 254 nm/ バンド幅:4 nm リファレンス  
360 nm/ バンド幅:100 nm 結果  
リテンションタイム

|        | 面積%     |
|--------|---------|
| 18.420 | 1.230   |
| 34.693 | 98.770  |
| 合計     | 100.000 |

### 3ad

Daicel Chiralpak AD-H, hexane/*i*-PrOH = 96/4, flow rate = 1.0 mL/min,  $\lambda$  = 267 nm, retention time;  $t_R$ (minor) = 16.5 min,  $t_R$ (major) = 17.4 min.

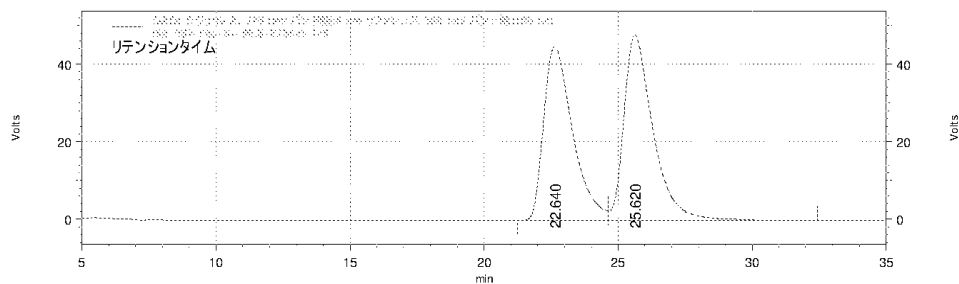

DAD: シグナル A, 275 nm/ バンド幅:4 nm リファレンス  
360 nm/ バンド幅:100 nm 結果  
リテンションタイム

|        | 面積%    |
|--------|--------|
| 22.640 | 48.186 |
| 25.620 | 51.814 |

|    |         |
|----|---------|
| 合計 | 100.000 |
|----|---------|

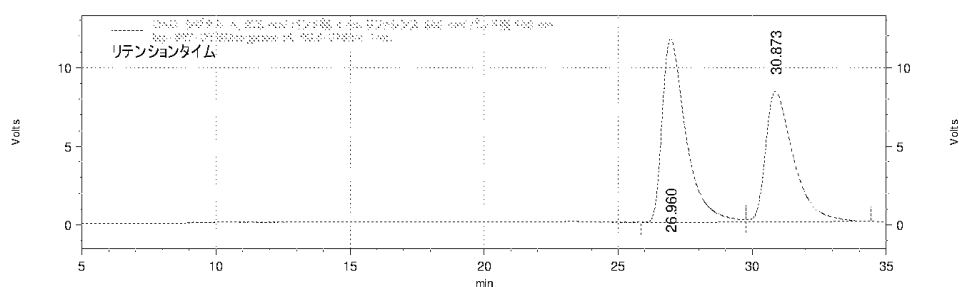

DAD: シグナル A, 275 nm/ バンド幅:4 nm リファレンス  
360 nm/ バンド幅:100 nm 結果  
リテンションタイム

|        | 面積%    |
|--------|--------|
| 26.960 | 54.599 |
| 30.873 | 45.401 |

|    |         |
|----|---------|
| 合計 | 100.000 |
|----|---------|

### 3ae

Daicel Chiralpak AD-H, hexane/*i*-PrOH = 95/5, flow rate = 1.0 mL/min,  $\lambda$  = 275 nm, retention time;  $t_R$ (major) = 20.1 min,  $t_R$ (minor) = 41.2 min.

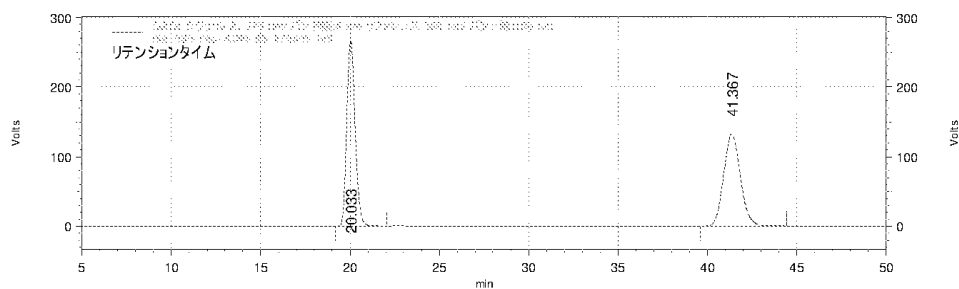

DAD: シグナル A, 275 nm/ バンド幅:4 nm リファレンス  
360 nm/ バンド幅:100 nm 結果  
リテンションタイム

|        | 面積%    |
|--------|--------|
| 20.033 | 50.117 |
| 41.367 | 49.883 |

|    |         |
|----|---------|
| 合計 | 100.000 |
|----|---------|

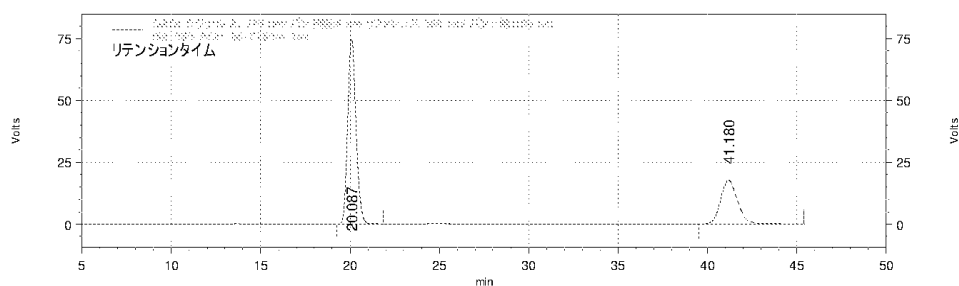

DAD: シグナル A, 275 nm/ バンド幅:4 nm リファレンス  
360 nm/ バンド幅:100 nm 結果  
リテンションタイム

|        | 面積%    |
|--------|--------|
| 20.087 | 67.634 |
| 41.180 | 32.366 |

|    |         |
|----|---------|
| 合計 | 100.000 |
|----|---------|

### 3af

Daicel Chiralpak OD-H, hexane/*i*-PrOH = 85/15, flow rate = 1.0 mL/min,  $\lambda$  = 254 nm, retention time;  $t_R$ (major) = 26.8 min,  $t_R$ (minor) = 44.1 min.

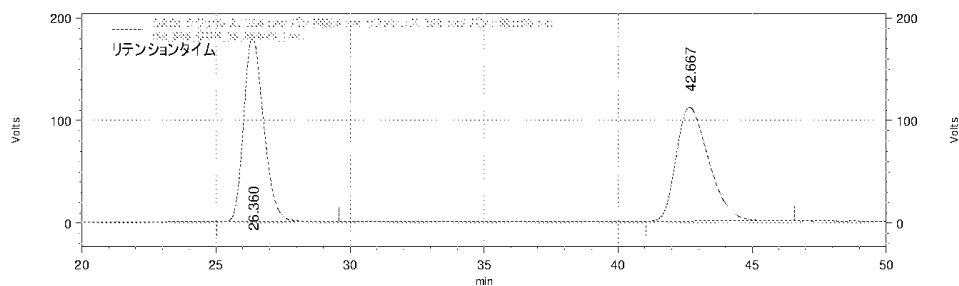

DAD: シグナル A, 254 nm/ バンド幅:4 nm リファレンス  
360 nm/ バンド幅:100 nm 結果  
リテンションタイム

|        | 面積%    |
|--------|--------|
| 26.360 | 49.933 |
| 42.667 | 50.067 |

|    |         |
|----|---------|
| 合計 | 100.000 |
|----|---------|

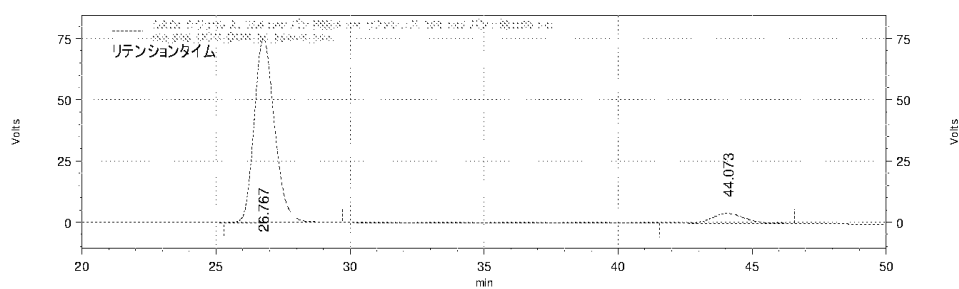

DAD: シグナル A, 254 nm/ バンド幅:4 nm リファレンス  
360 nm/ バンド幅:100 nm 結果  
リテンションタイム

|        | 面積%    |
|--------|--------|
| 26.767 | 91.916 |
| 44.073 | 8.084  |

|    |         |
|----|---------|
| 合計 | 100.000 |
|----|---------|

### 3ag

Daicel Chiralpak AD-H, hexane/*i*-PrOH = 90/10, flow rate = 1.0 mL/min,  $\lambda$  = 267 nm, retention time;  $t_R$ (minor) = 10.2 min,  $t_R$ (major) = 12.0 min.

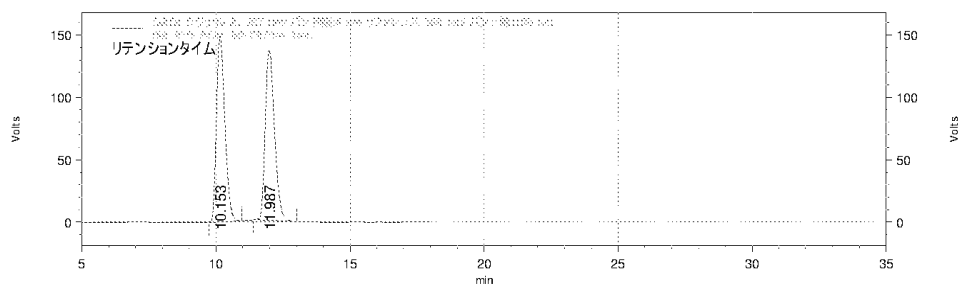

DAD: シグナル A, 267 nm/ バンド幅:4 nm リファレンス  
360 nm/ バンド幅:100 nm 結果  
リテンションタイム

|        | 面積%    |
|--------|--------|
| 10.153 | 49.716 |
| 11.987 | 50.284 |

|    |         |
|----|---------|
| 合計 | 100.000 |
|----|---------|

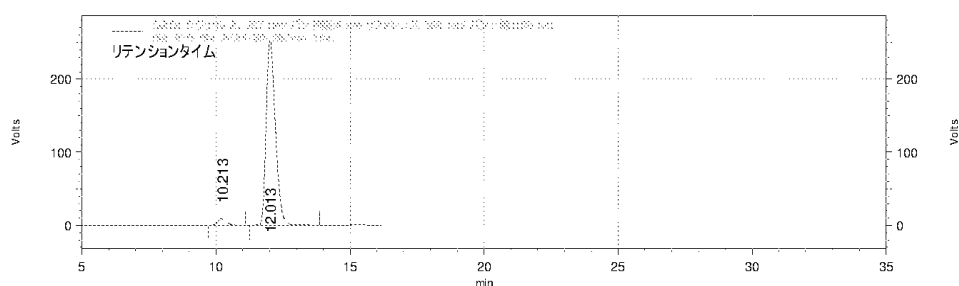

DAD: シグナル A, 267 nm/ バンド幅:4 nm リファレンス  
360 nm/ バンド幅:100 nm 結果  
リテンションタイム

|        | 面積%    |
|--------|--------|
| 10.213 | 3.058  |
| 12.013 | 96.942 |

|    |         |
|----|---------|
| 合計 | 100.000 |
|----|---------|

### 3ah

Daicel Chiralpak AD-H, hexane/*i*-PrOH = 99/1, flow rate = 1.0 mL/min,  $\lambda$  = 260 nm, retention time;  $t_R$  = 18.5 min,  $t_R$  = 26.7 min.

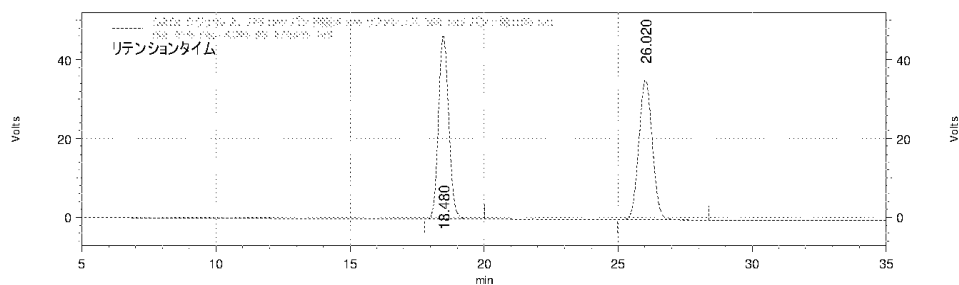

DAD: シグナル A, 275 nm/ バンド幅:4 nm リファレンス  
360 nm/ バンド幅:100 nm 結果  
リテンションタイム

|        | 面積%    |
|--------|--------|
| 18.480 | 49.931 |
| 26.020 | 50.069 |

|    |         |
|----|---------|
| 合計 | 100.000 |
|----|---------|

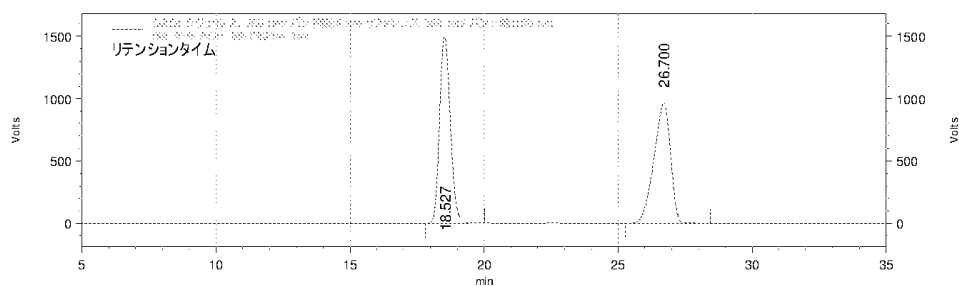

DAD: シグナル A, 260 nm/ バンド幅:4 nm リファレンス  
360 nm/ バンド幅:100 nm 結果  
リテンションタイム

|        | 面積%    |
|--------|--------|
| 18.527 | 50.126 |
| 26.700 | 49.874 |

|    |         |
|----|---------|
| 合計 | 100.000 |
|----|---------|

### 3ai

Daicel Chiralpak AD-H, hexane/*i*-PrOH = 95/5, flow rate = 1.0 mL/min,  $\lambda$  = 275 nm, retention time;  $t_R$ (minor) = 56.0 min,  $t_R$ (major) = 69.1 min.

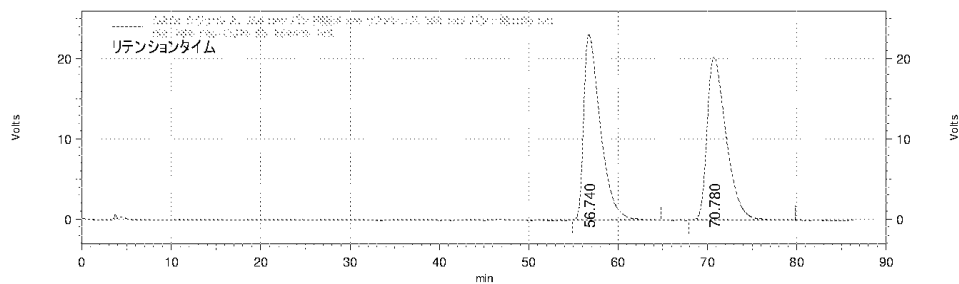

DAD: シグナル A, 254 nm/ バンド幅:4 nm リファレンス  
360 nm/ バンド幅:100 nm 結果  
リテンションタイム

|        | 面積%    |
|--------|--------|
| 56.740 | 49.833 |
| 70.780 | 50.167 |

|    |         |
|----|---------|
| 合計 | 100.000 |
|----|---------|

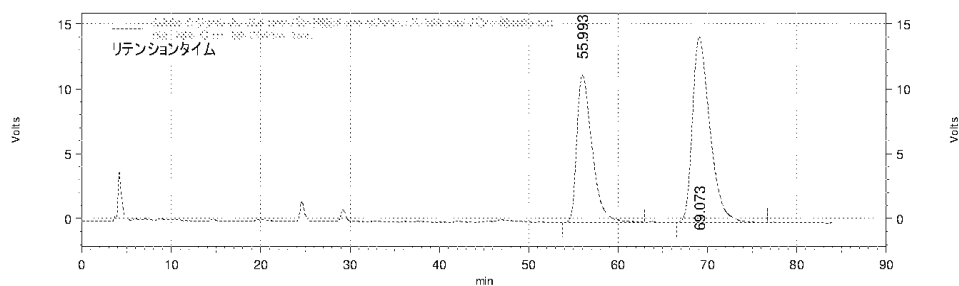

DAD: シグナル A, 254 nm/ バンド幅:4 nm リファレンス  
360 nm/ バンド幅:100 nm 結果  
リテンションタイム

|        | 面積%    |
|--------|--------|
| 55.993 | 40.909 |
| 69.073 | 59.091 |

|    |         |
|----|---------|
| 合計 | 100.000 |
|----|---------|



### 3ak

Daicel Chiralpak AD-H, hexane/*i*-PrOH = 98/2, flow rate = 1.0 mL/min,  $\lambda$  = 267 nm, retention time;  $t_R$ (major) = 21.1 min,  $t_R$ (minor) = 25.0 min.

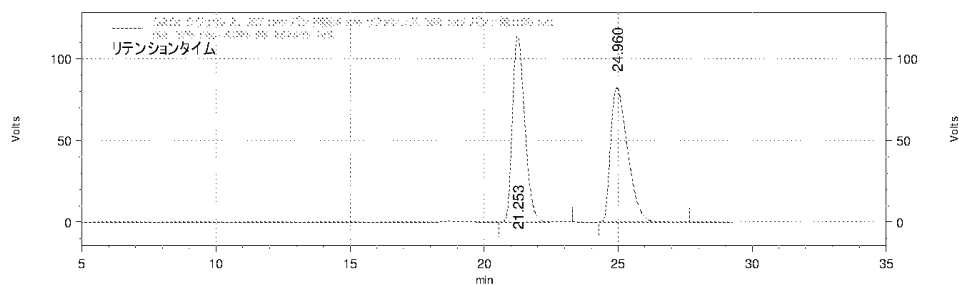

DAD: シグナル A, 267 nm/ バンド幅:4 nm リファレンス  
360 nm/ バンド幅:100 nm 結果  
リテンションタイム

|        | 面積%    |
|--------|--------|
| 21.253 | 50.156 |
| 24.960 | 49.844 |

|    |         |
|----|---------|
| 合計 | 100.000 |
|----|---------|

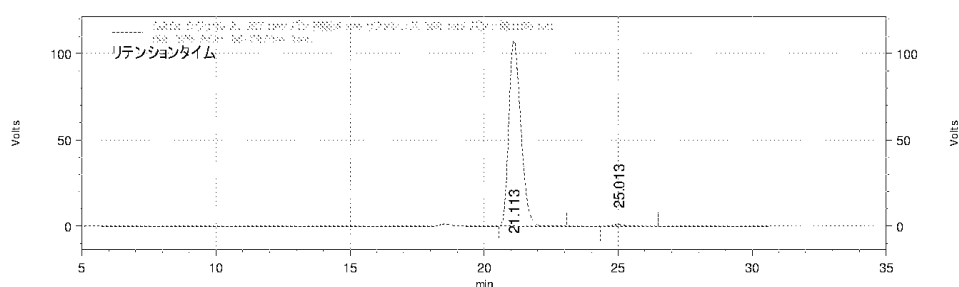

DAD: シグナル A, 267 nm/ バンド幅:4 nm リファレンス  
360 nm/ バンド幅:100 nm 結果  
リテンションタイム

|        | 面積%    |
|--------|--------|
| 21.113 | 98.907 |
| 25.013 | 1.093  |

|    |         |
|----|---------|
| 合計 | 100.000 |
|----|---------|

### 3am

Daicel Chiralpak OD-H, hexane/*i*-PrOH = 90/10, flow rate = 1.0 mL/min,  $\lambda$  = 254 nm, retention time;  $t_R$ (major) = 13.3 min,  $t_R$ (minor) = 20.5 min.

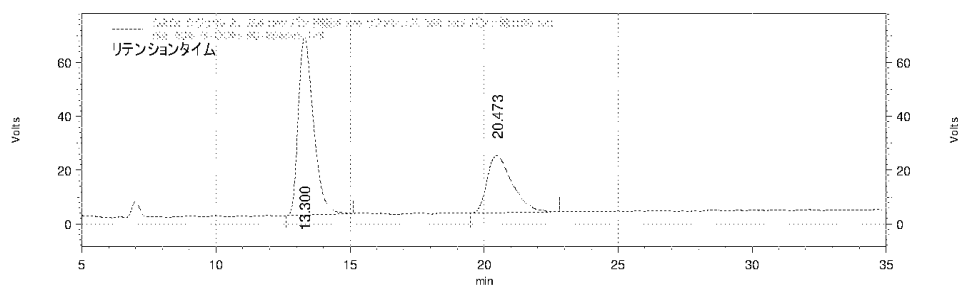

DAD: シグナル A, 254 nm/ バンド幅:4 nm リファレンス  
360 nm/ バンド幅:100 nm 結果  
リテンションタイム

|        | 面積%     |
|--------|---------|
| 13.300 | 65.408  |
| 20.473 | 34.592  |
| 合計     | 100.000 |

### 3an

Daicel Chiralpak AS-H, hexane/*i*-PrOH = 98/2, flow rate = 1.0 mL/min,  $\lambda$  = 254 nm, retention time;  $t_R$ (major) = 15.4 min,  $t_R$ (minor) = 22.6 min.

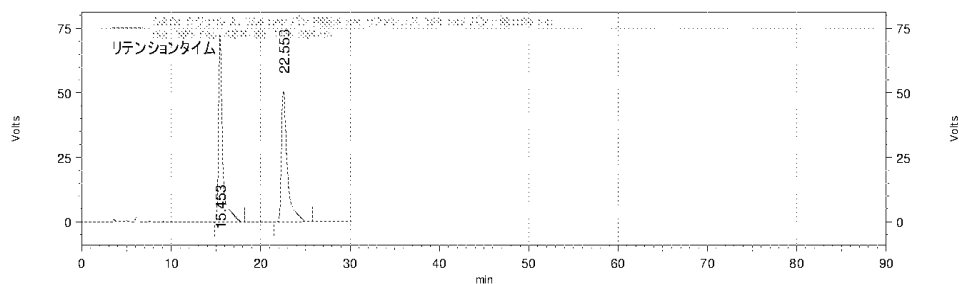

DAD: シグナル A, 254 nm/ バンド幅:4 nm リファレンス  
360 nm/ バンド幅:100 nm 結果  
リテンションタイム

|        | 面積%     |
|--------|---------|
| 15.453 | 49.892  |
| 22.553 | 50.108  |
| 合計     | 100.000 |

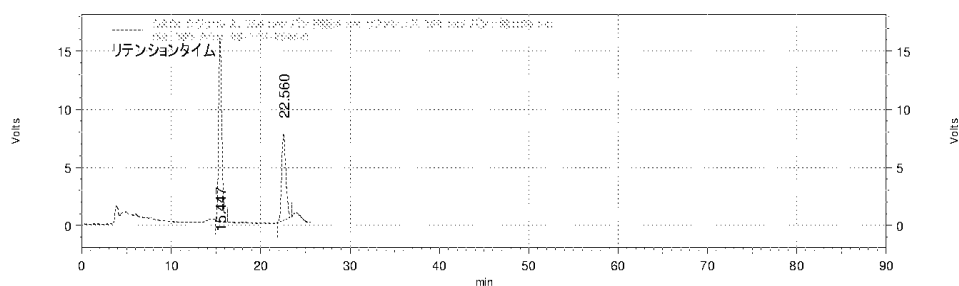

DAD: シグナル A, 254 nm/ バンド幅:4 nm リファレンス  
360 nm/ バンド幅:100 nm 結果  
リテンションタイム

|        | 面積%     |
|--------|---------|
| 15.447 | 61.942  |
| 22.560 | 38.058  |
| 合計     | 100.000 |

3ao

Daicel Chiralpak AD-H, hexane/*i*-PrOH = 98/2, flow rate = 1.0 mL/min,  $\lambda$  = 254 nm, retention time;  $t_R$  = 25.8 min,  $t_R$  = 28.9 min.

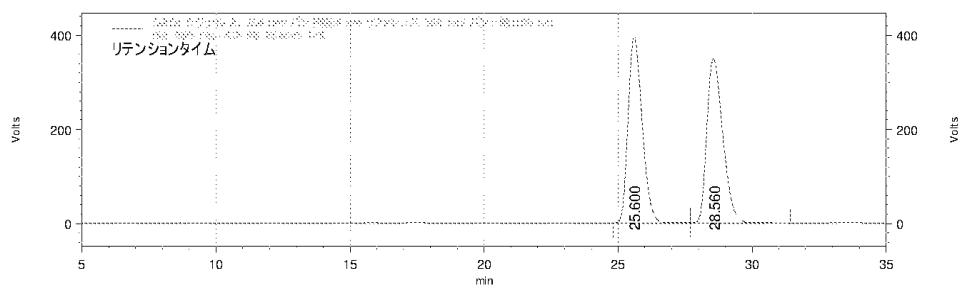

DAD: シグナル A, 254 nm/ バンド幅:4 nm リファレンス  
360 nm/ バンド幅:100 nm 結果  
リテンションタイム

|        | 面積%    |
|--------|--------|
| 25.600 | 50.009 |
| 28.560 | 49.991 |

|    |         |
|----|---------|
| 合計 | 100.000 |
|----|---------|

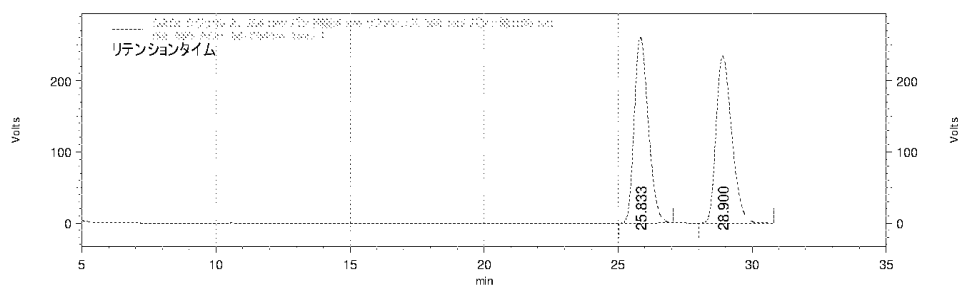

DAD: シグナル A, 254 nm/ バンド幅:4 nm リファレンス  
360 nm/ バンド幅:100 nm 結果  
リテンションタイム

|        | 面積%    |
|--------|--------|
| 25.833 | 49.867 |
| 28.900 | 50.133 |

|    |         |
|----|---------|
| 合計 | 100.000 |
|----|---------|

### 3ap

Daicel Chiralpak AD-H, hexane/*i*-PrOH = 99/1, flow rate = 1.0 mL/min,  $\lambda$  = 254 nm, retention time;  $t_R$  = 13.9 min,  $t_R$  = 16.7 min.

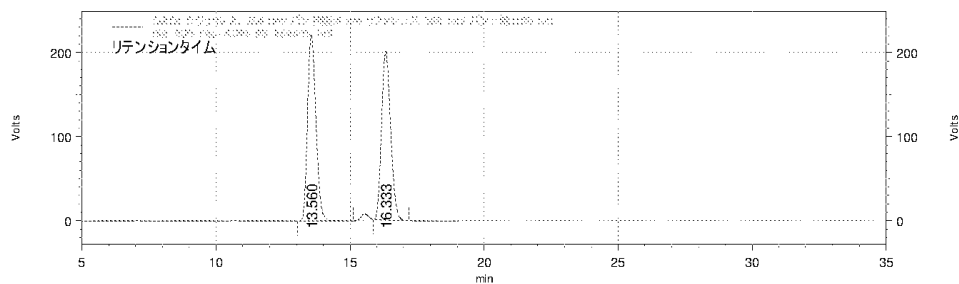

DAD: シグナル A, 254 nm/ バンド幅:4 nm リファレンス  
360 nm/ バンド幅:100 nm 結果  
リテンションタイム

|        | 面積%    |
|--------|--------|
| 13.560 | 50.406 |
| 16.333 | 49.594 |

|    |         |
|----|---------|
| 合計 | 100.000 |
|----|---------|

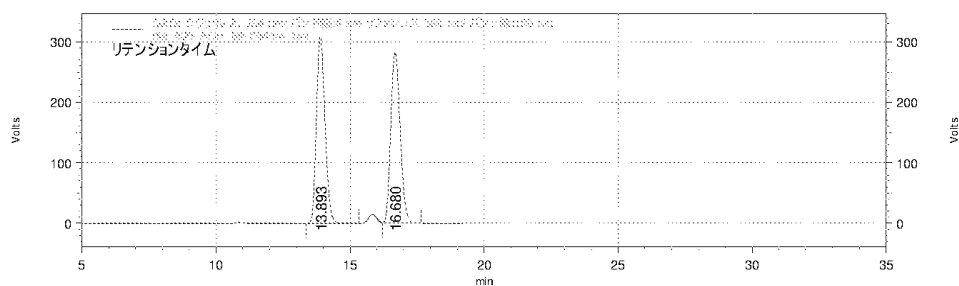

DAD: シグナル A, 254 nm/ バンド幅:4 nm リファレンス  
360 nm/ バンド幅:100 nm 結果  
リテンションタイム

|        | 面積%    |
|--------|--------|
| 13.893 | 50.296 |
| 16.680 | 49.704 |

|    |         |
|----|---------|
| 合計 | 100.000 |
|----|---------|

### 3aq

Daicel Chiralpak AD-H, hexane/*i*-PrOH = 98/2, flow rate = 1.0 mL/min,  $\lambda$  = 254 nm, retention time;  $t_R$  = 18.1 min,  $t_R$  = 19.7 min.

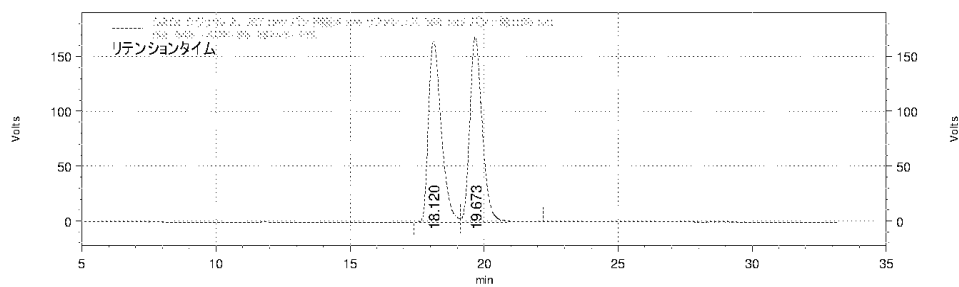

DAD: シグナル A, 267 nm/ バンド幅:4 nm リファレンス  
360 nm/ バンド幅:100 nm 結果  
リテンションタイム

|        | 面積%    |
|--------|--------|
| 18.120 | 50.061 |
| 19.673 | 49.939 |

|    |         |
|----|---------|
| 合計 | 100.000 |
|----|---------|

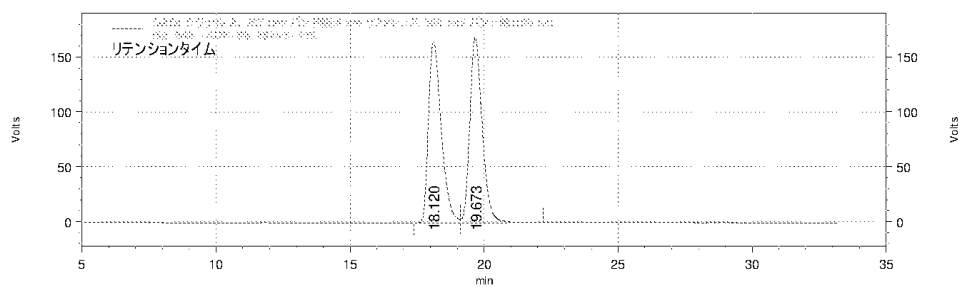

DAD: シグナル A, 267 nm/ バンド幅:4 nm リファレンス  
360 nm/ バンド幅:100 nm 結果  
リテンションタイム

|        | 面積%    |
|--------|--------|
| 18.120 | 50.061 |
| 19.673 | 49.939 |

|    |         |
|----|---------|
| 合計 | 100.000 |
|----|---------|
